1  
2  
3 **Viral-mediated ubiquitination impacts**  
4  
5 **interactions of host proteins with viral RNA**  
6  
7 **and promotes viral RNA processing**  
8  
9

10 Christin Herrmann<sup>1,2</sup>, Joseph M. Dybas<sup>1,3,4</sup>, Jennifer C. Liddle<sup>1,4</sup>,  
11 Alexander M Price<sup>1,4</sup>, Katharina E. Hayer<sup>3</sup>, Richard Lauman<sup>5,6</sup>, Caitlin E. Purman<sup>1,4</sup>,  
12 Matthew Charman<sup>1,4</sup>, Eui Tae Kim<sup>1,4</sup>, Benjamin A Garcia<sup>5,7</sup>,  
13 and Matthew D Weitzman<sup>1,4,5,\*</sup>

14  
15 <sup>1</sup> *Division of Protective Immunity and Division of Cancer Pathobiology,*  
16 *The Children's Hospital of Philadelphia, Philadelphia, PA 19104, USA*

17 <sup>2</sup> *Cell & Molecular Biology Graduate Group,*

18 *University of Pennsylvania, Philadelphia, PA 19104, USA*

19 <sup>3</sup> *Department of Biomedical and Health Informatics,*

20 *The Children's Hospital of Philadelphia, Philadelphia, PA 19104, USA*

21 <sup>4</sup> *Department of Pathology and Laboratory Medicine,*

22 *Perelman School of Medicine, University of Pennsylvania, Philadelphia, PA 19104, USA*

23 <sup>5</sup> *Epigenetics Institute,*

24 *Perelman School of Medicine, University of Pennsylvania, Philadelphia, PA 19104, USA*

25 <sup>6</sup> *Graduate Group in Biochemistry and Biophysics,*

26 *Perelman School of Medicine, University of Pennsylvania, Philadelphia, PA 19104, USA*

27 <sup>7</sup> *Department of Biochemistry and Biophysics,*

28 *Perelman School of Medicine, University of Pennsylvania, Philadelphia, PA 19104, USA*

29  
30  
31 **Keywords:** Adenovirus; ubiquitin ligase; proteomics; RNA processing

32 \* corresponding author E-mail: [weitzmanm@email.chop.edu](mailto:weitzmanm@email.chop.edu)

33 **ABSTRACT**

34 Viruses promote infection by hijacking host ubiquitin machinery to counteract or redirect  
35 cellular processes. Adenovirus encodes two early proteins, E1B55K and E4orf6, that  
36 together co-opt a cellular ubiquitin ligase complex to overcome host defenses and  
37 promote virus production. Adenovirus mutants lacking E1B55K or E4orf6 display defects  
38 in viral RNA processing and protein production, but previously identified substrates of the  
39 redirected ligase do not explain these phenotypes. Here we used a quantitative  
40 proteomics approach to identify substrates of E1B55K/E4orf6-mediated ubiquitination  
41 that facilitate RNA processing. While all currently known cellular substrates of  
42 E1B55K/E4orf6 are degraded by the proteasome, we uncovered RNA-binding proteins  
43 (RBPs) as high-confidence substrates which are not decreased in overall abundance.  
44 We focused on two RBPs, RALY and hnRNP-C, which we confirm are ubiquitinated  
45 without degradation. Knockdown of RALY and hnRNP-C increased levels of viral RNA  
46 splicing, protein abundance, and progeny production during infection with E1B55K-  
47 deleted virus. Furthermore, infection with virus deleted for E1B55K resulted in increased  
48 interaction of hnRNP-C with viral RNA, and attenuation of viral RNA processing. These  
49 data suggest viral-mediated ubiquitination of RALY and hnRNP-C relieves a restriction  
50 on viral RNA processing, revealing an unexpected role for non-degradative ubiquitination  
51 in manipulation of cellular processes during virus infection.

52

## 53 INTRODUCTION

54 Viruses have evolved mechanisms to alter cellular pathways to promote infection  
55 and inactivate host defenses. One way this can be achieved is through viral factors that  
56 redirect host post-translational protein modification such as ubiquitination, in order to  
57 regulate protein function and turnover. Viruses interface with the host ubiquitin system  
58 by encoding their own ubiquitin ligases, redirecting cellular ubiquitin ligases, or altering  
59 ubiquitin removal by deubiquitinating enzymes<sup>1-3</sup>. Ubiquitin can be employed as a signal  
60 for diverse outcomes, including proteasome-mediated degradation, protein localization,  
61 and regulating interactions with other proteins or nucleic acids<sup>4-7</sup>. This diversity of function  
62 makes hijacking the host ubiquitin machinery an attractive approach for viruses to  
63 manipulate multiple cellular pathways.

64 The nuclear-replicating Adenovirus (Ad) encodes two early proteins (E1B55K and  
65 E4orf6) which integrate into an existing host ubiquitin ligase complex containing Elongin  
66 B and C, Cullin5, and RBX1<sup>8,9</sup>. The cellular ligase is recruited through E4orf6, and the  
67 E1B55K protein is involved in substrate recognition to redirect the ligase activity<sup>9</sup>. The  
68 importance of hijacking the host ubiquitin machinery for productive virus infection has  
69 been demonstrated using Ad deletion mutants or expression of dominant negative  
70 Cullin5, which all severely limit virus production<sup>10-18</sup>. Several cellular proteins have been  
71 identified as targets for proteasomal degradation mediated by the Ad serotype 5 (Ad5)  
72 E1B55K/E4orf6 complex, including MRE11, RAD50, NBS1, DNA Ligase IV, BLM, Integrin  
73  $\alpha$ 3, and the tumor suppressor p53<sup>8,19-23</sup>. Degradation of these proteins represses DNA  
74 damage signaling and apoptosis during infection<sup>24-26</sup>. However, the E1B55K/E4orf6  
75 complex also stimulates export of viral late mRNAs and synthesis of viral late proteins<sup>11-</sup>  
76 <sup>16</sup>. Viral mutants defective for either E1B55K or E4orf6 exhibit reduced viral late RNA,  
77 late protein abundance, and progeny production but show little impact on early stages of  
78 virus infection<sup>11-16</sup>. The mutant virus phenotype was mapped to a nuclear step of viral  
79 late RNA processing. None of the known substrates fully explain these deficiencies, since  
80 mutant viruses still show lower late protein levels in cells deficient in p53 or lacking a  
81 functional DNA damage response<sup>10-16</sup>.

82 In this study, we used an unbiased global proteomics approach to identify new  
83 cellular substrates of ubiquitination mediated by the Ad5 E1B55K/E4orf6 complex. We

84 used antibody-based di-glycine remnant enrichment combined with profiling by mass  
85 spectrometry (K- $\epsilon$ -GG)<sup>27,28</sup> to quantify changes in the cellular ubiquitinome induced upon  
86 expression of E1B55K and E4orf6. The K- $\epsilon$ -GG approach allows for direct identification  
87 of peptides modified as a result of E1B55K/E4orf6 expression. Furthermore, we  
88 examined the impact of ubiquitination on protein abundance by employing whole cell  
89 proteomics (WCP). This combined approach enabled us to identify many potential targets  
90 of the E1B55K/E4orf6 complex, and classify these proteins as predicted degraded or non-  
91 degraded substrates. Our analysis suggests that the E1B55K/E4orf6 complex can  
92 facilitate different types of ubiquitination, and reveals that the majority of cellular  
93 substrates are ubiquitinated without significant changes in their protein abundance.  
94 Among the cellular substrates predicted to be ubiquitinated without degradation, we found  
95 an enrichment for cellular RNA-binding proteins (RBPs). We further validated the  
96 importance of the highly ubiquitinated RBPs RALY and hnRNP-C as two host proteins  
97 modified by the virus to overcome restriction of viral late transcript production. We identify  
98 the first substrates that provide a mechanistic link between E1B55K/E4orf6-mediated  
99 ubiquitination and the known roles of the complex in Ad5 viral RNA processing.  
100 Furthermore, these studies highlight a viral approach to exploit ubiquitination without  
101 degradation as a strategy to manipulate host pathways.

102

## 103 **RESULTS**

104 **Functional Ad E1B55K/E4orf6 complex is required for viral late RNA splicing.** We  
105 hypothesized that ubiquitination mediated by the E1B55K/E4orf6 complex can either  
106 target cellular proteins for proteasomal degradation, as seen for all currently known  
107 substrates including MRE11, RAD50, and BLM<sup>20,23</sup>, or could impact function without  
108 affecting protein abundance (**Fig. 1a**). We assessed the role of E1B55K/E4orf6-mediated  
109 ubiquitination on RNA processing and late protein accumulation by inactivating the  
110 complex through deletion of the E1B55K gene or chemical inhibition of Cullin5 ubiquitin  
111 ligase activity<sup>29</sup>. Infection with an E1B55K mutant virus ( $\Delta$ E1B) resulted in decreased  
112 levels of viral late proteins (hexon, penton, fiber and protein VII) but had minimal impact  
113 on viral early protein production (DBP) when compared to wild-type (WT) Ad5 infection  
114 (**Fig. 1b; Supplementary Fig. 1a**). Cullin ubiquitin ligases require post-translational

115 modification by the ubiquitin-like protein NEDD8 to form a functional ubiquitin ligase  
116 complex<sup>30,31</sup>. We hypothesized that inhibition of the Cullin5 complex hijacked by  
117 E1B55K/E4orf6 would mimic  $\Delta$ E1B virus infection. We used a small molecule inhibitor of  
118 the neddylation activating enzyme (NEDDi; MLN4924<sup>29</sup>) to block Cullin-mediated  
119 ubiquitination during infection. Inhibition of Cullin neddylation was confirmed by  
120 decreased abundance of the slower-migrating modified Cullin5 (**Fig. 1b**). Inhibition of the  
121 ubiquitin ligase activity of the viral E1B55K/E4orf6 complex was confirmed by blocking of  
122 MRE11 and BLM degradation. NEDDi treatment during WT Ad5 infection substantially  
123 decreased levels of viral late proteins (hexon, penton, fiber and protein VII) but only  
124 marginally decreased production of the viral early protein DBP (**Fig. 1b; Supplementary**  
125 **Fig. 1a**). Furthermore, NEDDi treatment did not further alter the late protein defect  
126 observed with E1B55K deletion (**Fig. 1b**). The increase of E1B55K levels upon NEDDi  
127 treatment is likely caused by inhibition of auto-ubiquitination, which is common among  
128 ubiquitin ligases<sup>32</sup>. We then assessed several steps of viral RNA processing during  
129 inhibition of ubiquitination or E1B55K deletion. We observed decreased accumulation of  
130 viral late mRNA for transcripts containing the major late promoter (MLP) and fiber gene  
131 during NEDDi treatment of WT Ad5 infection, similar to decreases detected with E1B55K  
132 deletion (**Fig. 1c**). These lower mRNA levels could be caused by defects in different  
133 steps of RNA processing: transcription, splicing, or decay. We assessed transcription  
134 and RNA turnover in WT and  $\Delta$ E1B infection using 4sU-labeling of nascent RNA  
135 (**Supplementary Fig. 1b**). Our analysis revealed that deletion of E1B55K does not  
136 negatively impact transcription or RNA decay of viral early (E1A and E4) or viral late  
137 (MLP) RNA. Furthermore, we analyzed RNA decay by blocking transcription with  
138 Actinomycin D and measuring viral early (E1A) and late (MLP) RNA levels over a time  
139 course, comparing WT and  $\Delta$ E1B infection (**Supplementary Fig. 1c**). This experiment  
140 confirmed that turnover of spliced viral RNA does not decrease in the absence of E1B55K.  
141 We used quantitative reverse transcription PCR (RT-qPCR) to determine the ratio of  
142 spliced:unspliced transcript as a measure for splicing efficiency (**Supplementary Fig.**  
143 **1d**). This analysis revealed that both NEDDi treatment and E1B55K deletion decreased  
144 splicing efficiency of viral late transcripts (MLP and fiber), compared to untreated WT,  
145 without negatively impacting the early E1A transcript (**Fig. 1d; Supplementary Fig. 1e**

146 and **1f**). We also examined cytoplasmic RNA accumulation by fluorescence *in situ*  
147 hybridization (FISH) for fiber transcripts. This experiment demonstrated that less fiber  
148 RNA reaches the cytoplasm upon E1B55K deletion, which was recapitulated by NEDDi  
149 inhibition (**Fig. 1e**; **Supplementary Fig. 1g**). Failure to splice transcripts correctly causes  
150 retention in the nucleus and subsequent degradation of the unspliced RNA<sup>33,34</sup>. Incorrect  
151 splicing could explain the observed RNA export defect and decrease in RNA levels  
152 observed for late viral transcripts. These data demonstrate that chemical inhibition of  
153 Cullin ligases recapitulates the effects of E1B55K deletion, highlighting that  
154 E1B55K/E4orf6-mediated ubiquitination of substrates is important for RNA splicing, RNA  
155 export, and protein production of viral late transcripts during Ad5 infection. None of the  
156 previously identified cellular substrates of E1B55K/E4orf6-mediated ubiquitination explain  
157 these phenotypes.

158

159 **Proteomics reveals enrichment of RNA-binding proteins among cellular substrates**  
160 **of the E1B55K/E4orf6 complex.** To identify cellular substrates of the Ad5  
161 E1B55K/E4orf6 complex that could explain the RNA processing defect of the  $\Delta$ E1B virus,  
162 we conducted global remnant profiling of the ubiquitinome (K- $\epsilon$ -GG) and associated whole  
163 cell proteome (WCP) over a time course of transduction of HeLa cells with viral vectors  
164 encoding Ad5 E1B55K and E4orf6<sup>19,35</sup> (**Fig. 2a**; **Supplementary Fig. 2**). Using non-  
165 replicating viral vectors allowed us to identify substrates specific to the activity of the viral  
166 E1B55K/E4orf6 complex outside the context of Ad5 infection. We assayed the  
167 degradation kinetics of known cellular substrates (BLM, MRE11, RAD50, and NBS1) by  
168 immunoblotting to determine when proteins were most likely to be modified but still  
169 detectable (**Supplementary Fig. 2a**). We subsequently performed K- $\epsilon$ -GG analysis for  
170 ubiquitin modification at 0, 6, 8, and 10 hours post-transduction (hpt), and WCP at 0 and  
171 10 hpt for protein abundance<sup>27,28</sup> (**Fig. 2a**).

172 Ubiquitin is covalently attached to its substrate and upon proteolytic cleavage with  
173 trypsin the C-terminal glycine residues of ubiquitin remain attached to the modified lysine  
174 residue (K- $\epsilon$ -GG). We enriched for peptides containing these di-glycine remnants using  
175 an antibody<sup>27</sup> and identified modified peptides by mass spectrometry. We performed  
176 three replicates for each timepoint and identified a similar number of peptides in

177 untransduced cells (2,050 peptides quantified in at least two replicates) and those  
178 transduced by E1B55K/E4orf6 at 6, 8, and 10 hours (2,132; 2,010; and 2,154 peptides  
179 respectively) (**Supplementary Fig. 2b; Supplementary Table 1**). The identified K- $\epsilon$ -GG  
180 peptides corresponded to 1,164 proteins overall. Changes in peptide modification were  
181 then normalized to changes in total protein abundance. Expression of E1B55K/E4orf6  
182 induced a significant increase in ubiquitination ( $p < 0.05$  and  $\log_2$  fold-change  $> 1$ ) for 39  
183 peptides (**Fig. 2b**). Additionally, 51 peptides were ubiquitinated upon expression of  
184 E1B55K/E4orf6 but were not identified as ubiquitinated in untransduced cells, and  
185 therefore do not have a calculated fold-change or associated p-value. Peptides uniquely  
186 ubiquitinated during transduction are defined as those not quantified in any mock cell  
187 samples but found in 2-3 replicates from transduced cells. Since these unique peptides  
188 were not identified in mock conditions, they therefore do not have quantification values.  
189 The lack of quantification values precludes calculation of associated fold changes or p-  
190 values since both of these calculations require numerical values for both compared  
191 conditions. Therefore, in these cases, we used z-scores to assess abundance of  
192 ubiquitination during expression of E1B55K/E4orf6, and for downstream analysis to  
193 define the most highly ubiquitinated proteins. Peptides that exhibited increased or unique  
194 ubiquitination upon E1B55K/E4orf6 expression included known protein substrates  
195 MRE11 (4 peptides) and RAD50 (5 peptides).

196 A similar number of proteins were quantified in the WCP of untransduced cells  
197 (6,213 proteins identified in at least 2 replicates) and cells transduced by E1B55K/E4orf6  
198 (6,241 proteins identified in at least 2 replicates in 10 hour timepoint) (**Supplementary**  
199 **Fig. 2c; Supplementary Table 1**). The WCP data show that E1B55K/E4orf6 expression  
200 induced significant changes in protein abundance, with 46 proteins significantly  
201 decreased at the 10 hour timepoint ( $\log_2$  fold change  $\leq -1$  and  $p < 0.05$  or unique  
202 identification at 0 hour timepoint). Consistent with previous studies, we observed  
203 significant decreases for the known substrates MRE11, NBS1, RAD50, and LIG4 upon  
204 E1B55K/E4orf6 expression (**Fig. 2b**).

205 To compare K- $\epsilon$ -GG and WCP datasets, the peptide-level K- $\epsilon$ -GG data were  
206 transformed into protein-based K- $\epsilon$ -GG abundance changes by calculating the  
207 abundance-weighted average of the K- $\epsilon$ -GG peptide  $\log_2$  fold-changes for all modified

208 peptides detected for the respective protein. Resulting protein-based K- $\epsilon$ -GG log<sub>2</sub> fold-  
209 changes were plotted against their associated WCP fold-changes (**Fig. 2c**). We  
210 implemented a threshold for protein-based K- $\epsilon$ -GG increase of > 2 fold and identified 120  
211 host proteins as putative substrates of the Ad5 ubiquitin ligase. Proteins that were  
212 ubiquitinated and also decreased in abundance by more than 1 standard deviation (s.d.)  
213 from the mean proteome change were predicted to be degraded substrates of the  
214 E1B55K/E4orf6 complex (**Fig. 2c** and **2d**, red; **Supplementary Table 2**). The degraded  
215 substrates (25 proteins) include known targets MRE11 and RAD50. Conversely, proteins  
216 that were ubiquitinated and exhibited abundance changes within 1 s.d. of the mean WCP  
217 abundance change were predicted to be ubiquitinated as a result of the E1B55K/E4orf6  
218 complex but not subsequently degraded (91 proteins) (**Fig. 2c** and **2d**, blue;  
219 **Supplementary Table 2**). These data provide the first evidence that the Ad5  
220 E1B55K/E4orf6 complex facilitates non-degradative ubiquitination, and suggest that the  
221 majority of potential substrates of the viral complex fall into this category.

222 Gene ontology analysis of predicted substrates for the E1B55K/E4orf6 complex  
223 revealed significant enrichment of “poly(A) RNA binding” and “RNA-binding” GO  
224 annotations (**Fig. 2e**; **Supplementary Table 3**). Since E1B55K deletion has been shown  
225 to induce RNA processing defects, we focused on the 26 proteins included within the  
226 RNA-binding GO terms (**Supplementary Fig. 3a**). There were 7 RBPs predicted to be  
227 ubiquitinated only in the presence of E1B55K/E4orf6, of which RALY stands out as the  
228 RBP with the highest abundance of ubiquitination at 10 hpt. Additionally, hnRNP-C is an  
229 interaction partner of RALY which had the largest number of sites that increase in  
230 ubiquitination among RBPs (**Fig. 2f**; **Supplementary Fig. 3b**). We used the Reactome<sup>36</sup>  
231 protein-protein interaction database to analyze interactions among all predicted  
232 substrates of the E1B55K/E4orf6 complex, and found RALY and hnRNP-C together in an  
233 interaction module with other RBPs (**Fig. 2g**; **Supplementary Fig. 4 and Table 3**). A  
234 literature search revealed that 11 of the 17 proteins in this module have reported  
235 association with viral infection (**Fig. 2g**; **Supplementary Table 4**). Both RALY and  
236 hnRNP-C are expressed at high levels in all tissues<sup>37</sup> and are implicated in multiple steps  
237 of RNA processing, including RNA splicing and export<sup>38-43</sup>. Additionally, it has been  
238 reported that hnRNP-C binds to Ad transcripts encoding late proteins<sup>44</sup>. We therefore



239 chose to further validate RALY and hnRNP-C as cellular substrates of the E1B55K/E4orf6  
240 complex and to characterize their impact on Ad5 biology.

241

242 **RALY and hnRNP-C are ubiquitinated but not degraded upon E1B55K/E4orf6**  
243 **expression.** RALY and hnRNP-C are ~43% homologous, with the highest homology  
244 (63%) in the coiled-coil (CC) domain, which contains all the lysine residues that show  
245 increased ubiquitination upon E1B55K/E4orf6 expression (**Fig. 3a; Supplementary Fig.**  
246 **5**). The lysine residue of hnRNP-C that shows the highest increase in ubiquitination  
247 (K204) is analogous to the only detected ubiquitination site in RALY (K198). Since  
248 E1B55K is the substrate recognition component of the ligase assembled with the Ad  
249 complex, we examined interaction of E1B55K with the two host RBPs during Ad5 virus  
250 infection (**Fig. 3b**). We performed immunoprecipitation (IP) of E1B55K, RALY and  
251 hnRNP-C for mock, Ad5 WT, and  $\Delta$ E1B infection conditions followed by immunoblotting  
252 for viral and host proteins. IP of E1B55K isolated RALY and hnRNP-C from cells infected  
253 with WT virus but not the  $\Delta$ E1B mutant (**Fig. 3b**). In the reciprocal experiment, E1B55K  
254 was detected upon IP of either RALY or hnRNP-C during WT virus infection, confirming  
255 interaction between the E1B55K/E4orf6 complex and the two host RBPs (**Fig. 3b**). The  
256 cellular hnRNP-C and RALY proteins interact in reciprocal IPs, as reported previously<sup>45</sup>,  
257 and this association was not impacted by virus infection. To confirm ubiquitination of  
258 RALY and hnRNP-C induced by viral proteins, we expressed Flag-tagged RALY or  
259 hnRNP-C, HA-tagged ubiquitin, and E4orf6 by transfection of HEK293 cells (this cell line  
260 contains a genomic integration of Ad5 E1B55K<sup>46</sup>). IP for the HA epitope and  
261 immunoblotting for Flag revealed an increase in high molecular weight ubiquitin-  
262 complexes of RALY and hnRNP-C in the presence of E4orf6 (**Fig. 3c; Supplementary**  
263 **Fig. 6a**). hnRNP-C2, an alternative isoform of hnRNP-C, is also ubiquitinated in the  
264 presence of the E1B55K/E4orf6 complex (**Supplementary Fig. 6b**). The overall  
265 stoichiometry for ubiquitination is low relative to the total protein abundance of RALY and  
266 hnRNP-C, as is the case with many post-translational protein modifications. To  
267 demonstrate that activated Cullin complexes are involved in ubiquitination of RALY and  
268 hnRNP-C by the Ad5 complex, we performed experiments with NEDDi treatment. The  
269 elevated ubiquitination of RALY and hnRNP-C detected by expression of E4orf6 and HA-

270 ubiquitin was decreased upon NEDDi treatment (**Fig. 3d; Supplementary Fig. 6c**).  
271 Inhibition of NEDDylation appeared to reduce endogenous ubiquitination of hnRNP-C but  
272 not RALY. These data suggest that a Cullin ubiquitin ligase may ubiquitinate hnRNP-C  
273 but not RALY in the absence of the viral proteins, consistent with the K- $\epsilon$ -GG data where  
274 hnRNP-C modification was increased from the mock condition but RALY was uniquely  
275 modified during infection. We also verified that hnRNP-C was ubiquitinated during  
276 infection with Ad5 WT but not with the  $\Delta$ E1B mutant (**Fig. 3e**). The RALY antibody quality  
277 precluded our ability to detect endogenous protein in this assay. Our WCP analysis  
278 showed that RALY and hnRNP-C are not decreased in abundance during infection  
279 (**Supplementary Fig. 3a**). Lack of degradation was confirmed by immunoblot analysis  
280 which showed stable abundance of RALY and hnRNP-C protein levels over a time course  
281 of Ad5 WT infection or transduction with E1B55K/E4orf6 vectors (**Fig. 3f; Supplementary**  
282 **Fig. 6d**). RALY and hnRNP-C levels were also stable during transduction of A549 and  
283 U2OS cells with E1B55K/E4orf6 vectors, as well as transfection of HEK293 cells with an  
284 E4orf6 expression vector (**Supplementary Fig. 6e**). RALY and hnRNP-C protein levels  
285 remained relatively stable during infection in the presence of cycloheximide, further  
286 supporting that turnover is not increased by infection (**Fig. 3g**). Finally, mRNA levels for  
287 RALY and hnRNP-C as measured by RT-qPCR, remain stable during a time course of  
288 Ad WT infection (**Supplementary Fig. 6f**). We hypothesize that the E1B55K/E4orf6  
289 complex facilitates ubiquitination that induces degradative and non-degradative  
290 outcomes, depending on the substrate. To test this hypothesis, we investigated  
291 differences in ubiquitination of MRE11, RAD50, RALY, and hnRNP-C mediated by the  
292 E1B55K/E4orf6 complex. Proteasome inhibition by drugs such as MG132 leads to  
293 accumulation of ubiquitinated proteins that would otherwise be degraded. Ubiquitination  
294 assays were performed by transfection of HEK293 cells with and without MG132-  
295 mediated proteasome inhibition (**Fig. 3h**). Expression of E4orf6 increased ubiquitination  
296 of MRE11 which was further increased by proteasome inhibition, consistent with MRE11  
297 being a known degraded substrate of the viral complex. In contrast, expression of E4orf6  
298 increased ubiquitination of RALY and hnRNP-C but there was no further increase upon  
299 treatment with MG132. The fact that MG132 treatment did not alter ubiquitination of RALY  
300 and hnRNP-C suggests that ubiquitination of these substrates does not result in

301 degradation by the proteasome. Since the effect of proteasomal inhibition varies between  
302 substrates of the E1B55K/E4orf6 complex, we examined the ubiquitin chains attached to  
303 RALY and hnRNP-C as compared to MRE11 and RAD50. The ubiquitin linkage most  
304 commonly associated with proteasomal degradation is K48. To determine whether K48-  
305 linked ubiquitin is attached to MRE11, RAD50, RALY, or hnRNP-C we performed native  
306 IPs of HA-ubiquitin, expressed in HEK293 cells together with E4orf6, and then compared  
307 the degree of ubiquitination after treatment with deubiquitinating enzymes (DUBs) that  
308 cleave either all ubiquitin linkages (DUB<sup>Pan</sup>) or only K48-linked ubiquitin chains (DUB<sup>K48</sup>)<sup>47</sup>  
309 **(Fig. 3i; Supplementary Fig. 6g)**. MRE11 and RAD50 showed a clear decrease of high  
310 molecular weight ubiquitin chains upon treatment with both DUBs, indicating that K48-  
311 linked ubiquitin is attached to these substrates to induce proteasomal degradation. In  
312 contrast, ubiquitination of RALY and hnRNP-C decreased with the DUB<sup>Pan</sup> but not the  
313 more specific DUB<sup>K48</sup>. This suggests that RALY and hnRNP-C are substrates for non-  
314 K48 linked ubiquitination, distinct from the K48-linked ubiquitin chains on degraded  
315 substrates MRE11 and RAD50. Our data support a non-degradative role for  
316 ubiquitination of hnRNP-C and RALY, although it is possible that degradation occurs  
317 within a sub-population too small to distinguish by this global analysis. Together, these  
318 data validate RALY and hnRNP-C as the first non-degraded cellular substrates identified  
319 for the E1B55K/E4orf6 Ad5 ligase complex.

320

321 **RALY and hnRNP-C are detrimental for viral late RNA processing.** To determine  
322 whether RALY and hnRNP-C impact Ad infection, we used siRNA to knockdown these  
323 host proteins in HeLa and primary-like HBEC3-KT cells, and then infected with WT Ad5  
324 and  $\Delta$ E1B viruses **(Fig. 4)**. Although RALY and hnRNP-C are not degraded during  
325 infection, this approach allowed us to determine whether these RBPs are beneficial or  
326 detrimental to virus infection. Knockdown of RALY and hnRNP-C did not affect viral  
327 protein levels during WT Ad5 infection, suggesting that in the context of infection with a  
328 fully competent virus their presence does not have a significant impact. Infection with  
329  $\Delta$ E1B virus generated reduced viral late protein levels as compared to WT Ad5 **(Fig. 4a)**.  
330 Depletion of RALY and hnRNP-C rescued this viral late protein defect almost to the level  
331 observed in WT Ad5 **(Fig. 4a; Supplementary Fig. 7a and 7b)**. We examined whether

332 knockdown of RALY and hnRNP-C also affects progeny production of the  $\Delta$ E1B virus  
333 (**Fig. 4b**). There was no difference between WT Ad5 and  $\Delta$ E1B at 8 hours post-infection  
334 (hpi), before production of new infectious virions, confirming comparable virus input and  
335 entry. By 24 hpi the  $\Delta$ E1B virus produced > 100-fold fewer viral particles than WT Ad5.  
336 Knockdown of RALY and hnRNP-C had no effect on WT Ad5, but significantly increased  
337 progeny production for the mutant virus (**Fig. 4b**). Similar rescue of the  $\Delta$ E1B virus was  
338 observed with RALY and hnRNP-C knockdown prior to infection in HBEC3-KT cells (**Fig.**  
339 **4b**). These data suggest that RALY and hnRNP-C are detrimental to Ad infection and  
340 that E1B55K/E4orf6-mediated ubiquitination relieves their restriction on virus production.  
341 Since RALY and hnRNP-C are involved in RNA splicing and export, we hypothesized that  
342 their depletion selectively increases late RNA processing without affecting DNA  
343 replication and viral early RNAs. We therefore examined viral DNA replication by  
344 quantifying genome accumulation using qPCR (**Fig. 4c**). There was a modest decrease  
345 (2-fold) in DNA replication for the  $\Delta$ E1B virus as compared to WT Ad5, in agreement with  
346 prior reports<sup>48</sup>. Viral DNA accumulation for both WT Ad5 and  $\Delta$ E1B was not significantly  
347 affected by depletion of RALY and hnRNP-C (**Fig. 4c**), confirming that their effects are  
348 mediated at a step after viral genome replication. We then quantified RNA levels of both  
349 viral early (E1A) and late (MLP and fiber) transcripts (**Fig. 4d**). Levels of late but not early  
350 transcripts decreased upon infection with  $\Delta$ E1B virus, which shows qualitative correlation  
351 with the decrease in late proteins shown in in **Fig. 1b**. Depletion of RALY and hnRNP-C  
352 rescued mRNA levels for MLP and fiber at both 18 hpi and 24 hpi during infection with  
353  $\Delta$ E1B virus, to levels observed in WT Ad5 (**Fig. 4d**) without impacting the E1A transcript  
354 (**Supplementary Fig. 7c**). Splicing efficiency of MLP and fiber was reduced in the  $\Delta$ E1B  
355 virus and was rescued to WT Ad5 levels upon knockdown of RALY and hnRNP-C (**Fig.**  
356 **4e; Supplementary Fig. 7c**). We also used FISH to examine the effect of RALY and  
357 hnRNP-C depletion on export of fiber mRNA into the cytoplasm. siRNA treatment  
358 increased the amount of cytoplasmic fiber RNA visible in  $\Delta$ E1B infection, while not  
359 impacting WT Ad5 (**Fig. 4f**). Depletion of either RALY or hnRNP-C by itself increased  
360 viral late protein, RNA levels, and splicing efficiency of the mutant virus, with hnRNP-C  
361 knockdown having a more dramatic effect than RALY knockdown (**Supplementary Fig.**  
362 **7e-g**). To connect the impact of RALY and hnRNP-C depletion on late stages of Ad

363 infection with Cullin-dependent ubiquitination by the E1B55K/E4orf6 complex, we  
364 combined siRNA-mediated knockdown with NEDDi treatment during WT Ad5 infection.  
365 The NEDDi treatment decreased viral late RNA levels, splicing efficiency, and protein  
366 production (**Fig. 4g-i**). Knockdown of RALY and hnRNP-C completely rescued the defect  
367 caused by inhibition of Cullin function without impacting viral early proteins or RNA (**Fig.**  
368 **4g-i; Supplementary Fig. 7h-j**). These data suggest that RALY and hnRNP-C are  
369 detrimental to the late stages of Ad5 infection and that ubiquitination or depletion can  
370 overcome this defect.

371

372 **Infection causes global changes to hnRNP-C RNA binding.** Our data suggest that  
373 viral-mediated ubiquitination of RALY and hnRNP-C relieves a restriction on viral late  
374 RNA processing without the need for proteasomal degradation. Non-degradative  
375 ubiquitination has been reported to alter protein localization, for example by obscuring  
376 nuclear localization sequences and preventing nuclear import<sup>49</sup>. We examined  
377 localization of RALY and hnRNP-C by immunofluorescence (IF) in untreated HeLa cells  
378 and during infection with either WT Ad5 or  $\Delta$ E1B virus (**Supplementary Fig. 8a**). Both  
379 RALY and hnRNP-C showed a diffuse nuclear pattern in uninfected HeLa cells, in  
380 accordance with the reported localization of both proteins<sup>37</sup>. Upon infection, both proteins  
381 were excluded from viral replication centers marked by DBP or USP7 in a pattern that  
382 matches viral RNA and other RBPs<sup>50,51</sup>. However, there was no obvious difference in  
383 localization between WT Ad5 and  $\Delta$ E1B infection, suggesting that viral-induced  
384 ubiquitination does not specifically change their cellular localization. Since both RALY  
385 and hnRNP-C are ubiquitinated within the coiled-coil domain that is involved in  
386 multimerization and protein-RNA interaction (**Fig. 3a**), we examined whether overall  
387 protein complex formation is affected by treating HeLa cells with disuccinimidyl suberate  
388 (DSS) at various concentrations during mock, WT Ad5 or  $\Delta$ E1B infection  
389 (**Supplementary Fig. 8b**). DSS is a cell-permeable crosslinker that forms stable amide  
390 bonds between lysine residues in close proximity (less than 11.4 Å), crosslinking protein  
391 complexes. DSS treatment caused a mobility shift of hnRNP-C and RALY, consistent  
392 with previous reports of multimerization<sup>52</sup>. During WT Ad5 or  $\Delta$ E1B infections these  
393 patterns did not change, suggesting that viral-induced ubiquitination does not significantly

394 affect overall protein complex formation of hnRNP-C or RALY. Next, we employed  
395 targeted proteomic identification of RNA-binding regions (RBR-ID)<sup>53,54</sup> for hnRNP-C  
396 (**Supplementary Fig. 8c; Supplementary Table 5**). We compared in triplicate SILAC-  
397 labeled<sup>55</sup> HeLa cells that were uninfected or infected with Ad5 WT or  $\Delta$ E1B. At 24 hpi we  
398 performed 4sU-mediated protein-RNA photo-crosslinking of heavy-labeled cells, followed  
399 by hnRNP-C IP, nuclease treatment and proteolytic cleavage. Peptides in the crosslinked  
400 condition that bound RNA will retain RNA adducts, which causes a mass shift and loss of  
401 signal when compared to peptides from non-crosslinked conditions. Signal loss thus  
402 identifies which regions of a protein had direct contact with RNA *in vivo*. In addition, the  
403 non-crosslinked data give insight into the hnRNP-C interactome and potential changes  
404 upon Ad infection. In mock conditions, the most dramatic loss of signal was detected at  
405 the RNA-recognition motif (RRM) within hnRNP-C (**Fig. 5a**). The RRM is the most well-  
406 characterized RNA-binding domain in hnRNP-C and provides specificity for the poly-U  
407 motif identified as the preferred binding site<sup>56</sup>. Surprisingly, upon both WT and  $\Delta$ E1B  
408 infection the RRM interaction with RNA was dramatically decreased, while RNA  
409 interactions within the coiled-coil domain increased (**Fig. 5a**). Approximately ~20 amino  
410 acids downstream of the ubiquitination sites, we detected an RNA binding peak in mock  
411 samples that was decreased in WT Ad5 but increased in the mutant virus (**Fig. 5a**). This  
412 observation highlights a region of hnRNP-C potentially impacted by Ad-mediated  
413 ubiquitination. Since these two RBPs interact strongly, we were also able to analyze RNA  
414 binding for RALY from the hnRNP-C IP. Similar to hnRNP-C, we saw infection-mediated  
415 changes in the interaction of the RRM with RNA, and potential ubiquitin-mediated  
416 differences between WT and  $\Delta$ E1B infection close to the ubiquitination site  
417 (**Supplementary Fig. 8d**). In contrast to the large differences observed for the RNA-  
418 binding analysis, we only observed minimal differences in the hnRNP-C interactome  
419 when comparing mock, WT, and  $\Delta$ E1B infection (**Supplementary Fig. 8e;**  
420 **Supplementary Tables 6**). A global comparison of the interacting protein abundances  
421 across conditions revealed a Pearson correlation coefficient of >0.8. In addition, the 20  
422 most abundant hnRNP-C interactors did not show marked differences in interaction  
423 abundance between mock, WT, and  $\Delta$ E1B infection, with the only exception being viral  
424 proteins absent in mock (**Supplementary Fig. 8f**). In summary, RBR-ID revealed major

425 changes to RNA binding of hnRNP-C during infection and a potential ubiquitin-mediated  
426 difference between Ad5 WT and  $\Delta$ E1B infections.

427

428 **Interaction of hnRNP-C and RALY with viral late RNA is increased when Ad-**  
429 **mediated ubiquitination is disrupted.** RBR-ID identifies sites of RNA binding within a  
430 protein sequence but does not identify the RNA sequence that is bound. To determine  
431 the impact of Ad-mediated ubiquitination on interaction of hnRNP-C with viral RNA we  
432 performed crosslinking-immunoprecipitation (CLIP) followed by RT-qPCR for viral and  
433 cellular transcripts (**Supplementary Fig. 9a and 9b**). The hnRNP-C transcript itself  
434 served as a positive control for immunoprecipitation, while GAPDH RNA was a negative  
435 control<sup>57</sup>. All viral late transcripts were detected above background under WT Ad5  
436 conditions, however, there was a 2 to 4-fold increase in the amount of late RNA detected  
437 during  $\Delta$ E1B infection. There was however no dramatic difference in the level of early  
438 RNAs detected between WT Ad5 and mutant virus. This indicates that viral-induced  
439 ubiquitination of hnRNP-C specifically decreases the interaction with viral late transcripts.  
440 Since the overall stoichiometry for ubiquitination is low relative to the total protein  
441 abundance, this could indicate that ubiquitination either has a dominant negative impact  
442 on the overall protein pool or that the effect is localized. This approach showed linearity  
443 over a ten-fold dilution of input material, and displayed the same trend of increased  
444 binding to viral late RNA upon  $\Delta$ E1B infection (**Supplementary Fig. 9c**). In contrast,  
445 hnRNP-C CLIP-qPCR without UV-crosslinking or a CLIP with an IgG control precipitated  
446 minimal RNA (**Supplementary Fig. 9d and 9e**). Commercially available antibodies for  
447 RALY were not suitable for this technique. Therefore, we created an inducible RALY-  
448 Flag cell line and performed CLIP-qPCR by Flag immunoprecipitation. This demonstrated  
449 that similarly to hnRNP-C, RALY interacts more with viral late RNA in  $\Delta$ E1B infections,  
450 while binding to early RNA is unchanged or even decreased (**Supplementary Fig. 9f**).  
451 To support the idea that differences in hnRNP-C interaction with viral RNA are caused by  
452 ubiquitination, we repeated the hnRNP-C CLIP-qPCR with inhibition of Cullin-dependent  
453 ubiquitination during WT Ad5 infection (**Fig. 5c, Supplementary Fig. 9g**). Following the  
454 trend with  $\Delta$ E1B infection, the interaction of hnRNP-C with viral late transcripts increased  
455 at least 2-fold upon treatment with NEDDi, while there were only minor differences for

456 viral early and cellular transcripts. This experiment reinforces that hnRNP-C interaction  
457 with viral late RNAs increases in the absence of the functional viral ubiquitin ligase  
458 complex.

459 To determine whether hnRNP-C binding changes in an ubiquitin-mediated manner  
460 during infection, we performed a global analysis of hnRNP-C binding sites comparing  
461 mock, Ad5 WT, and  $\Delta$ E1B infection using enhanced CLIP followed by sequencing  
462 (eCLIP-Seq<sup>58</sup>) (**Fig. 5d**; **Supplementary Fig. 9h** and **9i**). We observed a dramatic  
463 reduction of hnRNP-C binding to host RNAs upon infection (**Fig. 5e**; **Supplementary Fig.**  
464 **9j**). More than 24,000 peaks were unique to mock condition, with only ~3,000 identified  
465 in all 3 conditions. Analysis of binding motifs revealed the known poly-U/poly-T binding  
466 motif of hnRNP-C among common and mock specific peaks (**Fig. 5f**). We also detected  
467 hnRNP-C peaks in host RNA that were only identified during WT and  $\Delta$ E1B infection,  
468 suggesting a potential role for ubiquitination in manipulating binding of hnRNP-C to  
469 cellular transcripts (**Supplementary Fig. 9k**). The hnRNP-C poly-U motif was lacking in  
470 these virus-specific peaks, supporting the RBR-ID data which show decrease of RNA  
471 binding for the hnRNP-C RRM upon infection (**Fig. 5a**). We also analyzed hnRNP-C  
472 binding sites on viral transcripts (**Fig. 5g** and **5h**). The number and location of hnRNP-C  
473 peaks were different between WT and  $\Delta$ E1B infection. Analyzing peaks unique to WT or  
474 mutant virus revealed that deletion of E1B55K increased hnRNP-C binding mainly in viral  
475 late transcripts (**Fig. 5i**). Differences were especially pronounced in the L3-L5 region of  
476 the major late transcription unit (**Fig. 5g**), which encodes viral hexon protein. These  
477 results were consistent with our CLIP-qPCR data (**Fig. 5b**). In addition, there are several  
478 hnRNP-C binding sites in viral late RNA regions such as MLP and fiber that are unique  
479 to  $\Delta$ E1B infection (**Fig. 5g**). Finally, we analyzed motifs present at hnRNP-C binding sites  
480 on viral transcripts. We saw no evidence of the canonical hnRNP-C poly-U motif  
481 observed on host transcripts (**Fig. 5j**). The most prominent motif for infection-specific  
482 hnRNP-C binding sites within both host and viral transcripts is very similar, suggesting a  
483 potential shift to a new hnRNP-C recognition motif caused by Ad5 infection. In summary,  
484 the RBR-ID and eCLIP-Seq data highlight major changes in hnRNP-C interaction with  
485 RNA caused by infection. Together, these results support a mode in which ubiquitination  
486 of hnRNP-C and RALY induced by the E1B55K/E4orf6 complex leads to reduced



487 interaction of these host RBPs with viral late RNA, thereby overcoming a detrimental  
488 effect on viral RNA processing (**Fig. 6**).

489  
490 **DISCUSSION**

491 Viruses commonly adapt cellular regulatory mechanisms towards efficient viral  
492 production. The E1B55K/E4orf6 complex is known to interact with the cellular Cullin5  
493 ubiquitin ligase to redirect ubiquitination and to stimulate viral late mRNA nuclear export  
494 and late protein synthesis. Prior studies identified binding partners of the complex and a  
495 limited number of substrates<sup>8,9,19-23,59-62</sup>, however, these studies did not enrich for proteins  
496 specifically ubiquitinated by the E1B55K/E4orf6 complex or explicitly link potential cellular  
497 substrates to effects on viral RNA processing. Here we employed a systematic  
498 proteomics approach to identify cellular ubiquitination substrates of the viral  
499 E1B55K/E4orf6 complex by combining quantification and analysis of the ubiquitinome  
500 and the associated whole cell proteome upon expression of E1B55K/E4orf6. We  
501 identified 119 potential substrates, with specific enrichment of RBPs that may be involved  
502 in viral RNA processing. In addition to RNA processing, functional analysis of the  
503 predicted substrates highlighted other host pathways that may be manipulated by Ad5-  
504 mediated ubiquitination: ubiquitin machinery and de-ubiquitinating enzymes, antigen  
505 presentation, protein folding, cellular transport, and cell signaling (**Supplementary Fig.**  
506 **4a**). We focused on two of the most highly ubiquitinated RBPs, RALY and hnRNP-C,  
507 which we demonstrated to be the first non-degraded ubiquitination substrates of the Ad5  
508 complex. We demonstrated differential interaction of hnRNP-C and RALY with viral late  
509 transcripts in the presence of an active E1B55K/E4orf6 complex, supporting a model in  
510 which RALY and hnRNP-C ubiquitination results in altered binding to viral late  
511 ribonucleoprotein (RNP) complexes, to promote efficient processing of late RNA (**Fig. 6**).  
512 Since hnRNP-C has reported roles in alternative splicing<sup>38,40,41</sup>, we propose that  
513 ubiquitination by the Ad5-induced complex results in exclusion from viral RNP complexes  
514 to promote splicing of late viral RNAs. Substrates of the E1B55K/E4orf6 complex can  
515 vary across human Ad serotypes, although some target proteins fall within the same  
516 cellular pathway<sup>63,64</sup>. It will be interesting to determine whether RBPs are similarly  
517 modified between serotypes or whether effects on RNA processing are achieved through

518 different substrates. There is a precedent for post-translational modification regulating  
519 hnRNP-C affinity for RNA, with conjugation of the ubiquitin-like protein SUMO decreasing  
520 the affinity of hnRNP-C for RNA<sup>65</sup>. Ubiquitin and related proteins have emerging roles in  
521 regulating splicing by altering the properties and dynamics of spliceosomal complexes  
522 through altered protein-protein interactions<sup>66</sup>. It is likely that RBPs such as RALY and  
523 hnRNP-C are also functionally regulated through ubiquitination by cellular ubiquitin  
524 ligases. Correlating changes to host splicing induced as a result of the impact of  
525 ubiquitination during Ad infection may provide insights into host pathways that are altered  
526 by ubiquitination of these RBPs. In addition to the ubiquitin-mediated changes in  
527 interaction of hnRNP-C and RALY with viral late RNA, we also observed global changes  
528 in the RNA-binding of hnRNP-C during infection, independent of the Ad ubiquitin ligase  
529 complex (**Fig. 5**). Understanding how Ad induces the reduction of RNA-binding by the  
530 hnRNP-C RRM and the associated changes in binding motif, may provide novel insights  
531 into regulation of RBP function.

532         Manipulation of the host ubiquitin machinery during virus infection has traditionally  
533 been studied in the context of proteasomal degradation and there are very few known  
534 examples of viruses directing ubiquitin towards cellular substrates that are not  
535 subsequently degraded<sup>1-3</sup>. This has been true for the Cullin5 ligase redirected by Ad  
536 E1B55K/E4orf6 which was previously shown to induce degradation of proteins involved  
537 in the cellular DNA damage response and apoptosis<sup>8,19-21,23</sup>. Our observation that the  
538 majority of potential cellular substrates of the E1B55K/E4orf6 complex appear to be  
539 ubiquitinated without significant decrease in abundance suggests that a major aspect of  
540 the activity of the viral assembled ligase is non-degradative ubiquitination. This finding  
541 highlights the need to combine ubiquitinome analysis together with whole cell proteome  
542 quantification when identifying outcomes of ubiquitination. Future studies of other viral  
543 ligases should include this type of analysis of non-degradative ubiquitination in order to  
544 ensure that all aspects of viral manipulation by ubiquitin are identified. We propose that  
545 ubiquitination without the need for proteasome-mediated degradation provides increased  
546 flexibility and more rapid approaches to counter host responses and redirect cellular  
547 processes. Viral redirection of ubiquitination may present particularly good model  
548 systems to study how ubiquitin ligases in general can facilitate both degradative and non-

549 degradative ubiquitination of distinct substrates. Given the increasing appreciation that  
550 cellular ubiquitin ligases (such as Cullin ligases) can facilitate the formation of multiple  
551 different types of ubiquitin chains<sup>67-69</sup>, viral infections provide systems to decipher the  
552 rules that govern outcomes of ubiquitination.

553 In addition to its contributions to fundamental knowledge of cellular and molecular  
554 biology, Ad has also been developed as a vector for gene delivery and oncolytic cancer  
555 treatment. Mutant viruses that lack E1B55K have been shown to replicate conditionally  
556 in cancer cells, with selectivity that was initially suggested to be based on p53 inactivation  
557 but is more likely due to preferential viral late mRNA export<sup>70-72</sup>. Since many cancers  
558 have altered RNA processing, the Ad  $\Delta$ E1B used for oncolytic therapies may be  
559 complemented by defects in substrates of the E1B55K/E4orf6 complex. Our work  
560 suggests that alterations in these substrates, such as the RBPs RALY and hnRNP-C,  
561 may make tumor cells more susceptible to  $\Delta$ E1B-based oncolytic viruses.

562 **Materials and Methods**

563 **Cell culture**

564 All cell lines were obtained from the American Type Culture Collection (ATCC) and  
565 cultured at 37°C and 5% CO<sub>2</sub>. HeLa (Cat#: ATCC CCL-2), HEK293 (Cat#: ATCC CRL-  
566 1573), and U2OS cells (Cat#: ATCC HTB-96) were grown in DMEM (Corning, Cat#: 10-  
567 013-CV) supplemented with 10% v/v fetal bovine serum (FBS) (VWR, Cat#: 89510-186)  
568 and 1% v/v Pen/Strep (100 U/ml of penicillin, 100 µg/ml of streptomycin, Gibco, Cat#:  
569 15140-122). A549 cells (Cat#: ATCC CCL-185) were maintained in Ham's F-12K medium  
570 (Gibco, Cat#: 21127-022) supplemented with 10% v/v FBS and 1% v/v Pen/Strep.  
571 Primary like HBEC3-KT (Cat#: ATCC CRL-4051) were grown in Airway Epithelial Cell  
572 Basal Medium (Cat#: ATCC PCS-300-030) supplemented with Bronchial Epithelial Cell  
573 Growth Kit (Cat#: ATCC PCS-300-040) and 1% v/v Pen/Strep. The RALY-Flag inducible  
574 cell line was generated using a HeLa acceptor cell line kindly provided by E. Makeyev<sup>73</sup>  
575 and used as previously reported. RALY-Flag was cloned from the pcDNA3.1 plasmid  
576 described below and inserted into the inducible plasmid cassette using restriction  
577 enzymes BsrGI and AgeI. Sequence confirmed clones were transfected into the HeLa  
578 acceptor cells along with plasmid encoding the Cre recombinase. Clones were selected  
579 by puromycin (1 µg/mL) and induced with doxycycline (0.5 µg/mL) to express RALY-Flag.  
580 Protein expression was verified by immunoblot. All cell lines tested negative for  
581 mycoplasma using the LookOut Mycoplasma PCR Detection Kit (Sigma-Aldrich).

582

583 **Viruses and infection**

584 Ad5 wild-type (WT) was purchased from ATCC. The Ad5 E1B55K-deletion mutant dl110  
585 has been described previously<sup>10</sup> and was a gift from G. Ketner. The E1 deletion mutant  
586 recombinant adenovirus vectors expressing E1B55K (rAd E1B55K)<sup>35</sup> and E4orf6 (rAd  
587 E4orf6)<sup>19</sup> were obtained from P. Branton. All viruses were propagated on HEK293 cells,  
588 purified using two sequential rounds of ultracentrifugation in CsCl gradient and stored in  
589 40% v/v glycerol at -20°C. Viral titers were determined by plaque assay on HEK293 cells  
590 for all but rAd E4orf6. For this virus we assumed a plaque forming unit-to-particle ratio of  
591 1:50. All infections were carried out using a multiplicity of infection (MOI) of 10 and  
592 harvested at indicated hours post infection (hpi). Infections were performed on  
593 monolayers of cells by dilution of the virus in respective low serum growth medium. After  
594 2 h at 37°C additional full serum growth medium was added. For plaque assays, the virus  
595 infection media was removed after 2 h and cells were washed 1x in PBS before addition  
596 of full serum growth medium.

597

### 598 **Plasmids, siRNA and transfection**

599 Full-length RALY with a carboxyl-terminal Flag-tag (cDNA obtained from Dharmacon,  
600 Cat#: MHS6278-202857995) and hnRNP-C isoforms 1 and 2 with a carboxyl-terminal  
601 Flag-tag (cDNA containing plasmids were a gift from K. Lynch) and RFP were cloned into  
602 the pcDNA3.1 vector using the BamHI and XbaI restriction sites. The pRK5 vector  
603 encoding Ad5 E4orf6 was generated by subcloning from purified Ad5 DNA as previously  
604 described<sup>74</sup>. The expression vector for HA-tagged tetra-ubiquitin as previously  
605 described<sup>75</sup> was a gift from R. Greenberg DNA transfections were performed using the  
606 standard protocol for Lipofectamine2000 (Invitrogen).

607 The following siRNAs were obtained from Dharmacon: non-targeting control (Cat#: D-  
608 001206-13-05), RALY (Cat#: M-012392-00-0005) and hnRNP-C (Cat#: M-011869-01-  
609 0005; Cat#: L-011869-03-0005 only used for hnRNP-C single knockdown in  
610 supplementary Fig. 7). siRNA transfections were performed using the standard protocol  
611 for Lipofectamine RNAiMAX (Invitrogen).

612

### 613 **Antibodies and inhibitors**

614 The following primary antibodies for viral proteins were obtained: Adenovirus late protein  
615 antibody staining Hexon, Penton and Fiber (gift from J. Wilson<sup>76</sup>, species: rabbit, WB  
616 1:10,000), Protein VII (gift from H. Wodrich<sup>77</sup>, Clone: Chimera 2-14, WB 1:200), DBP (gift  
617 from A. Levine<sup>78</sup>, Clone: B6-8, WB 1:1000, IF 1:400), E1B55K (gift from A. Levine<sup>79</sup>,  
618 Clone: 58K2A6, WB 1:500) and E4orf6 (gift from D. Ornelles<sup>80</sup>, Clone: RSA#3, WB 1:500).

619 The following primary antibodies were used for cellular proteins: MRE11 (Novus  
620 Biologicals, Catalog#: NB100-142, WB 1:1000), BLM (Abcam, Catalog#: ab476, WB  
621 1:1000), Cullin5 (Bethyl Laboratories, Catalog#: A302-173A, WB 1:200), Actin (Sigma-  
622 Aldrich, Catalog#: A5441-100UL, WB 1:5000), RALY (Bethyl Laboratories, Catalog#:  
623 A302-070A, WB 1:1000; Bethyl Laboratories, Catalog#: A302-069A, IF 1:500, IP 5  $\mu$ l = 5  
624  $\mu$ g), hnRNP-C (Santa Cruz Biotechnology, Catalog#: sc-32308, WB 1:1000, IF 1:1000,  
625 IP 25  $\mu$ l=5  $\mu$ g), Tubulin (Santa Cruz Biotechnology, Catalog#: sc-69969, WB 1:1000),  
626 Flag (Sigma-Aldrich, Catalog#: F7425-.2MG, WB 1:1000; Sigma-Aldrich, Catalog#:  
627 F3165-1MG, IP 5  $\mu$ g), Ubiquitin (Santa Cruz, Catalog#: sc-9133, IP 10  $\mu$ l=2  $\mu$ g; Abcam,  
628 Catalog#: ab7780, IP 5  $\mu$ l), NBS1 (Novus Biologicals, Catalog#: NB100-143, WB 1:1000),

629 RAD50 (GeneTex, Catalog#: GTX70228, WB 1:1000) and USP7 (Bethyl Laboratories,  
630 Catalog#: A300-033A, IF 1:500).  
631 Horseradish peroxidase-conjugated (HRP) secondary antibodies for immunoblot were  
632 purchased from Jackson Laboratories. Anti-mouse IgG conjugated to HRP for  
633 immunoblot of immunoprecipitation samples (used in Fig. 3b) was purchased from Abcam  
634 (Cat#: ab131368). Fluorophore-conjugated secondaries for immunofluorescence were  
635 purchased from Life Technologies.  
636 Cycloheximide (CHX) was purchased from Calbiochem (Cat#: 293764), dissolved in  
637 DMSO to a stock concentration of 25 mM and used at a final concentration of 25  $\mu$ M.  
638 NEDDylation inhibitor MLN4924 was purchased from Sigma-Aldrich (Cat#: 505477),  
639 dissolved in DMSO to a stock concentration of 1 mM and used at a final concentration of  
640 3  $\mu$ M. Proteasome inhibitor MG132 was purchased from Sigma-Aldrich (Cat#: 474791) at  
641 a concentration of 10 mM in DMSO and used at a final concentration of 20  $\mu$ M.

642

### 643 **Immunoblotting**

644 Protein samples were prepared using lithium dodecyl sulfate (LDS) loading buffer  
645 (NuPage) supplemented with 25 mM dithiothreitol (DTT) and boiled at 95°C for 10 min.  
646 Equal amounts of protein lysate were separated by SDS-PAGE and transferred onto a  
647 nitrocellulose membrane (Millipore) at 30 V for at least 60 min (overnight for ubiquitination  
648 assays). Membranes were stained with Ponceau to confirm equal loading and blocked in  
649 5% w/v milk in TBST supplemented with 0.05% w/v sodium azide. Membranes were  
650 incubated with primary antibodies overnight, washed for 30 min in TBST, incubated with  
651 HRP-conjugated secondary for 1 h and washed again for 30 min in TBST. Proteins were

652 visualized with Pierce ECL Western Blotting Substrate (Thermo Scientific) and detected  
653 using a Syngene G-Box. Images were processed and assembled in Adobe CS6.  
654 Immunoblots were quantified by pixel densitometry using the Syngene GeneTools  
655 software.

656

### 657 **Immunofluorescence**

658 HeLa cells were grown on coverslips in 24-well plates, infected with indicated viruses and  
659 fixed at 24 hpi in 4% w/v paraformaldehyde in PBS for 10 mins. Cells were permeabilized  
660 with 0.5% v/v Triton-X in PBS for 10 mins. The samples were blocked in 3% w/v BSA in  
661 PBS (+ 0.05% w/v sodium azide) for 30 mins, incubated with primary antibodies in 3%  
662 w/v BSA in PBS (+ 0.05% w/v sodium azide) for 1 h, followed by secondary antibodies  
663 and 4,6-diamidino-2-phenylindole (DAPI) for 2 h. Secondary antibodies used were Alexa  
664 Fluor  $\alpha$ -rabbit 488 and  $\alpha$ -mouse 555. Coverslips were mounted onto glass slides using  
665 ProLong Gold Antifade Reagent (Cell Signaling Technologies). Immunofluorescence was  
666 visualized using a Zeiss LSM 710 Confocal microscope (Cell and Developmental  
667 Microscopy Core at UPenn) and ZEN 2011 software. Images were processed in ImageJ  
668 and assembled in Adobe CS6.

669

### 670 **RNA Fluorescence *in situ* hybridization**

671 RNA FISH was performed following previously established protocols<sup>81</sup>, with the following  
672 modifications. Thirty-two singly labeled DNA oligonucleotides targeting the Fiber open  
673 reading frame were designed using the Stellaris smFISH probe designer and ordered with  
674 a 3' mdC-TEG-Amino label from LGC Biosearch. Fiber FISH probes were pooled and



675 labeled with ATTO 647N NHS-Ester (ATTO-TEC, Cat#: AD 647N-31), isopropanol  
676 precipitated and purified by HPLC as previously described<sup>81</sup>. GAPDH probes labeled with  
677 Cy3 were used as a counterstain to demarcate cytoplasmic boundaries and were a kind  
678 gift from Sydney Schaffer, University of Pennsylvania<sup>82</sup>. All probe sequences can be  
679 found in **Supplementary Table 7**. HeLa cells were grown on coverslips, harvested, fixed,  
680 and permeabilized as described for conventional immunofluorescence above. After  
681 permeabilization, cells on coverslips were equilibrated in Wash Buffer (2X SSC, 10%  
682 formamide) before being inverted over 30  $\mu$ l Hybridization Buffer (2X SSC, 10%  
683 formamide, 10% dextran sulphate) containing 500 nM Fiber and GAPDH FISH probes  
684 and incubated at 37°C in a humidified chamber overnight. The following day coverslips  
685 were washed twice with Wash Buffer for 30 minutes at 37°C with DAPI added to the  
686 second wash, briefly washed three times at room temperature with 2X SSC, and then  
687 affixed to glass slides using clear nail polish. Images were acquired on a Zeiss LSM 710  
688 microscope with ten z-stacks of 0.7  $\mu$ m each in the z-direction. Images were deconvoluted  
689 by maximum intensity projection in the z-direction using ImageJ. Fiber RNA localization  
690 was scored as described in **Supplementary Figure 1** over 41-160 individual cells.  
691 Representative images were further processed in ImageJ and assembled in Adobe CS6.

692

### 693 **RNA isolation and RT-qPCR**

694 Total RNA was isolated from infected cells at the indicated timepoints using the RNeasy  
695 Micro Kit (Qiagen). Complementary DNA (cDNA) was synthesized using 1  $\mu$ g of input  
696 RNA and the High Capacity RNA-to-cDNA Kit (Thermo Fisher). Quantitative PCR was  
697 performed by standard protocol using diluted cDNA, primers for different viral and cellular

698 transcripts (see **Supplementary Table 7** for complete list of primers) and SYBR Green  
699 (Thermo Scientific) using the QuantStudio 7 Flex Real-Time PCR System (Thermo  
700 Scientific). The relative values for each transcript were normalized to a control RNA (actin  
701 or HPRT).

702

### 703 **RNA Transcription and Stability Profiling**

704 To assess relative RNA transcription rate and RNA half-life, cells were treated with 200  
705  $\mu\text{M}$  4-thiouridine (4sU; Sigma T4509) for exactly 30 min. Infection was stopped and RNA  
706 harvested using 1 ml TRIzol (Thermo Fisher Scientific), following manufacturer's  
707 instructions. A fraction of the total RNA was reserved as input, and the remaining 4sU-  
708 labeled nascent RNA was biotinylated using MTSEA-Biotin-XX (Biotium; 90066) as  
709 previously described<sup>83,84</sup>. Nascent RNA was separated from unlabeled RNA using MyOne  
710 C1 Streptavidin Dynabeads (Thermo Fisher Scientific; 65-001), biotin was removed from  
711 nascent RNA using 100 mM dithiothreitol (DTT), and RNA was isopropanol precipitated.  
712 Total RNA (1  $\mu\text{g}$ ) and an equivalent volume of nascent RNA were converted to cDNA and  
713 qPCR was performed as described above. Relative transcription rates were determined  
714 by the  $\Delta\Delta\text{Ct}$  method to compare nascent transcript levels between control and siRNA  
715 treated cells normalized to nascent GAPDH RNA. RNA half-life was determined using the  
716 previously described formula  $t_{1/2} = -t \times [\ln(2)/DR]$  where  $t$  is the 4sU labeling time (0.5 h)  
717 and  $DR$  is the decay rate defined as Nascent/Total RNA<sup>85</sup>. Half-lives were normalized to  
718 the half-life of GAPDH set at 8 h as previously determined<sup>86</sup>.

719

### 720 **RNA decay measurement using Actinomycin D**

721 To determine the decay of viral mRNA species, HeLa cells infected with either Ad5 WT  
722 or  $\Delta$ E1B were treated with 10  $\mu$ M Actinomycin D (Cayman Chemical, Cat#: 11421) at 24  
723 hpi. RNA harvested using RLT buffer (from Qiagen RNA isolation kit) at 0, 1, 2, 4, 6, and  
724 8 hours after treatment. RNA levels were quantified using RT-qPCR and normalized to 0  
725 hours of Actinomycin D to determine RNA decay.

726

### 727 **Viral genome accumulation by qPCR**

728 Infected cells were harvested by trypsinization at 4 and 24 hpi and total DNA was isolated  
729 using the PureLink Genomic DNA kit (Invitrogen). qPCR was performed using primers for  
730 the Ad5 DBP and cellular tubulin (see **Supplementary Table 7** for primers). Values for  
731 DBP were normalized internally to tubulin and to the 4 hpi timepoint to control for any  
732 variations in virus input. qPCR was performed using the standard protocol for SYBR  
733 Green and analyzed with the QuantStudio 7 Flex Real-Time PCR System.

734

### 735 **Plaque assay**

736 Infected cells seeded in 12-well plates were harvested by scraping at the indicated  
737 timepoints and lysed by three cycles of freeze-thawing. Cell debris was removed from  
738 lysates by centrifugation at max speed (21,130 g), 4°C, 5 min. Lysates were diluted  
739 serially in DMEM supplemented with 2% v/v FBS and 1% v/v Pen/Strep to infect HEK293  
740 cells seeded in 12-well plates. After incubation for 2 h at 37°C, the infection media was  
741 removed, and cells were overlaid with DMEM containing 0.45% w/v SeaPlaque agarose  
742 (Lonza) in addition to 2% v/v FBS and 1% v/v Pen/Strep. Plaques were stained using 1%  
743 w/v crystal violet in 50% v/v ethanol between 6 to 7 days post-infection.

744

745 **Immunoprecipitation**

746 Approximately  $2 \times 10^7$  cells were harvested, washed, pelleted and flash frozen for each  
747 immunoprecipitation. For IP of hnRNP-C and RALY 50  $\mu$ l of Protein G Dynabeads  
748 (Thermo Fisher) per sample were washed 3x in IP buffer (50 mM HEPES pH 7.4, 150  
749 mM KCl, 2 mM EDTA, 0.5% v/v NP-40, 0.5 mM DTT, 1x cOmplete Protease Inhibitor  
750 Cocktail (Roche)) and incubated with 5  $\mu$ g of antibody ( $\alpha$ -hnRNP-C or  $\alpha$ -RALY) rotating  
751 at 4°C for 2h. Cell pellets were resuspended in 1 ml IP buffer and incubated for 1 h on  
752 ice. Samples were sonicated with a Diagenode Biorupter on low setting for 30 s on and  
753 30 s off for ten rounds at 4°C and spun at max speed (21,130 g) for 10 min at 4°C. 300  $\mu$ l  
754 of sample were added to washed beads and incubated rotating at 4°C for 2h. Beads were  
755 washed 4x in IP wash (same as above but with only 0.05% v/v NP-40). Samples were  
756 eluted in 50  $\mu$ l 1x LDS sample buffer with 25 mM DTT by boiling for 10 min at 95°C and  
757 further processed for analysis by immunoblot.

758 The following changes were made to the protocol for IP of E1B55K: IP buffer contained  
759 50 mM Tris-HCl pH 7.4, 0.1% v/v Triton X-100, 150 mM NaCl, 50 mM NaF, 1 mM  $\text{Na}_3\text{VO}_4$ ,  
760 1x cOmplete Protease Inhibitor Cocktail.

761

762 **Denaturing *in vivo* ubiquitination assay**

763 Approximately  $1 \times 10^7$  cells were washed, pelleted and stored at -80°C for each  
764 immunoprecipitation. For HEK293 cells, the pellets were thawed on ice and resuspended  
765 in 100  $\mu$ l of Lysis buffer (1% w/v SDS, 5 mM EDTA, 10 mM DTT, 1x cOmplete Protease  
766 Inhibitor Cocktail) with 1  $\mu$ l Benzonase (Sigma-Aldrich) by vortexing. Samples were

767 incubated on ice for 5 min and then further denatured by heating to 95°C for 5 min. 900  
768  $\mu$ l of Wash buffer (10 mM Tris-HCl pH 7.4, 1 mM EDTA, 1 mM EGTA, 150 mM NaCl, 1%  
769 v/v Triton X-100, 0.2 mM Na<sub>3</sub>VO<sub>4</sub>, 1x cOmplete Protease Inhibitor Cocktail), passed 10  
770 times through a 23G syringe and spun at max speed (21,130 g) for 5 min at 4°C. A  
771 minimum of 800  $\mu$ l of sample was added to 50  $\mu$ l washed Pierce Anti-HA Magnetic beads  
772 (Thermo Fisher). Sample was incubated with beads rotating for 1 h at 4°C, washed 3x in  
773 Wash buffer and eluted in 1x LDS sample buffer with 25 mM DTT for further processing  
774 by immunoblot.

775 The following changes were made to the protocol for HeLa cells: the Lysis buffer  
776 contained 1% w/v SDS in PBS, Tris buffered saline with Tween-20 was used as wash  
777 buffer, Protein G Dynabeads incubated for 1 h with a mix of both  $\alpha$ -ubiquitin antibodies  
778 listed above were used for the IP.

779

#### 780 **De-ubiquitination assay**

781 Approximately  $1 \times 10^7$  HEK293 cells were washed, pelleted and stored at -80°C for each  
782 immunoprecipitation. The pellets were resuspended in 1 ml IP buffer B (20 mM HEPES-  
783 KOH pH 7.4, 110 mM potassium acetate, 2 mM MgCl<sub>2</sub>, 0.1% v/v Tween-20, 0.1% v/v  
784 Triton X-100, 150 mM NaCl, 1 mM DTT, 0.1 mM PTSF) containing 1x cOmplete Protease  
785 Inhibitor Cocktail, 20  $\mu$ M PR-619 (LifeSensors, Cat#: SI9619-5X5MG), 5 mM 1,10-  
786 phenanthroline (LifeSensors, Cat#: SI9649), and 1  $\mu$ l/ml Benzonase (Sigma-Alrich).  
787 Samples were incubated on ice for 30 min, sonicated with a Diagenode Biorupter on low  
788 setting for 30 s on and 30 s off for five rounds at 4°C and spun at max speed (21,130 g)  
789 for 5 min at 4°C. 925  $\mu$ l of sample was added to 100  $\mu$ l washed Pierce Anti-HA Magnetic

790 beads (Thermo Fisher). Sample was incubated with beads rotating for 2 h at 4°C, washed  
791 3x in IP buffer B, resuspended in 100 µl of IP buffer B and split into three 30 µl aliquots.  
792 1 µl of 20 mM PR-619 was added to sample 1 (untreated), 1 µl of USP2 (LifeSensors,  
793 Cat#: DB501) was added to sample 2 (DUB<sup>PAN</sup>) and 2 µl of OTUB1 (LifeSensors, Cat#:  
794 DB201) was added to sample 3 (DUB<sup>K48</sup>). Samples were incubated at 30°C for a minimum  
795 of 1 h. Samples were eluted by addition of 10 µl 4x LDS sample buffer with 100 mM DTT  
796 and boiling at 95°C for 10 min for further processing by immunoblotting.

797

### 798 **CLIP-qPCR**

799 The CLIP protocol was adapted from existing protocols<sup>58</sup>. In short, approximately  $2 \times 10^7$   
800 cells were crosslinked on ice with 0.8 J/cm<sup>2</sup> UV 254 nm in a UV Stratalinker 2400  
801 (Stratagene), washed in PBS with 2 mM EDTA and 0.2 mM PMSF, flash frozen in liquid  
802 nitrogen and stored at -80°C. 50 µl of Protein G Dynabeads per sample were washed 3x  
803 in iCLIP lysis buffer A (50 mM Tris-HCl pH 7.4, 100 mM NaCl, 0.2% v/v NP-40, 0.1% w/v  
804 SDS, 0.5% w/v Sodium deoxycholate, 1x cOmplete Protease Inhibitor Cocktail),  
805 resuspended in 100 µl iCLIP lysis buffer A and incubated with 5 µg of α-hnRNP-C  
806 antibody, 5 µg of α-Flag antibody (mouse), or 5 µl of Normal Mouse Serum Control  
807 (Thermo Fisher) rotating 1 h at 4°C. Cell pellets were resuspended in 1 ml of iCLIP lysis  
808 buffer B (same as buffer A but with 1% v/v NP-40 and 11 µl of Murine RNase inhibitor  
809 (NEB) per 1 ml) and incubated on ice for 15 min. Samples were sonicated with a  
810 Diagenode Biorupter on low setting for 30 s on and 30 s off for five rounds at 4°C. 2 µl of  
811 TURBO DNase (Thermo Fisher) were added and samples incubated at 37°C for 6 min.  
812 Lysates were cleared by centrifugation at max speed (21,130 g) for 15 min at 4°C and

813 supernatants transferred to a new tube. 300  $\mu$ l of lysate were added to washed beads  
814 and incubated rotating at 4°C for 2 h. Beads were washed 2x in High Salt buffer (50 mM  
815 Tris-HCl pH 7.4, 1 M NaCl, 1 mM EDTA, 0.2% v/v NP-40, 0.1% w/v SDS, 0.5% w/v  
816 Sodium deoxycholate), 2x in Wash buffer (20 mM Tris-HCl pH 7.4, 10 mM MgCl<sub>2</sub>, 0.2%  
817 v/v Tween-20) and 2x in Proteinase K buffer (100mM Tris-HCl pH 7.4, 50 mM NaCl, 10  
818 mM EDTA, 0.2% w/v SDS). Beads were resuspended in 50  $\mu$ l Proteinase K buffer and 10  
819  $\mu$ l removed and processed for immunoblot analysis. 10  $\mu$ l of Proteinase K (NEB) and 2  $\mu$ l  
820 Murine RNase Inhibitor were added to the remaining beads or to 30  $\mu$ l of input (10%) and  
821 incubated at 50°C for 1 h. The RNA was extracted using a standard protocol for TRIzol  
822 (Thermo Fisher) and further processed for RT-qPCR.

823

## 824 **seCLIP-Seq**

### 825 Sample preparation

826 The CLIP protocol was adapted from existing protocols<sup>87</sup>. In short, approximately  $2 \times 10^7$   
827 HeLa cells were crosslinked on ice with 0.8 J/cm<sup>2</sup> UV 254 nm in a UV Stratalinker 2400  
828 (Stratagene), washed in PBS with 2 mM EDTA and 0.2 mM PMSF, flash frozen in liquid  
829 nitrogen and stored at -80°C. Protein G Dynabeads (100  $\mu$ l per sample) were washed 3x  
830 in iCLIP lysis buffer A (see CLIP-qPCR), resuspended in 100  $\mu$ l iCLIP lysis buffer A and  
831 incubated with 10  $\mu$ g of  $\alpha$ -hnRNP-C antibody rotating 1 h at RT. Cell pellets were  
832 resuspended in 1 ml of iCLIP lysis buffer B and incubated on ice for 15 min. Samples  
833 were sonicated with a Diagenode Biorupter on low setting for 30 s on and 30 s off for five  
834 rounds at 4°C. Samples were incubated with 2  $\mu$ l of TURBO DNase (Thermo Fisher) and  
835 10  $\mu$ l of 1:10 diluted RNase I (Thermo Fisher) in Thermomixer at 1200 rpm at 37°C for 5  
836 min, samples placed on ice and 22  $\mu$ l SUPERase-In RNase Inhibitor was added. Cleared

837 lysate (500  $\mu$ l) was added to washed beads and incubated rotating at 4°C for 2 h. Beads  
838 were washed 2x in High Salt buffer, 2x in Wash buffer and 2x FastAP buffer. FastAP  
839 master mix (100  $\mu$ l) and FastAP enzyme (8  $\mu$ l) was added and samples were incubated  
840 with a Thermomixer at 1200 rpm at 37°C for 15 min. T4 PNK enzyme (7  $\mu$ l) and 300 PNK  
841 master mix were added and samples were incubated with a Thermomixer at 1200 rpm at  
842 37 °C for 20 min. Beads were washed and resuspended in Ligase buffer with 2.5  $\mu$ l RNA  
843 Ligase high conc., 2.5  $\mu$ l of RNA adapters (3SR\_RNA), and incubated at RT for 75 min.  
844 Beads were washed and a fraction saved for immunoblotting. For the remaining fraction,  
845 beads were resuspended in lysis buffer with DTT, eluted by incubation in Thermomixer,  
846 1200 rpm, 70 °C, run on SDS-PAGE and transferred onto Nitrocellulose o/n, 30V. Lanes  
847 for the RBP band (plus 75 kDa) and size-matched input were cut from the membranes  
848 RNA was eluted with 20  $\mu$ l of Proteinase K (Thermo Fisher) in a Thermomixer at 1200  
849 rpm at 50 °C for 1 h. RNA was extracted with acid phenol/chloroform/isoamyl alcohol (pH  
850 4.5), and concentrated using RNA Clean and Concentrator (Zymo). Size-matched inputs  
851 were ligated to 3SR\_RNA. All RNA samples were reverse transcribed with 0.9  $\mu$ l  
852 AffinityScript Enzyme at 55 °C for 45 min with RT primer SR\_RTv2. RNA and excess  
853 primers were removed with 3.5  $\mu$ l ExoSAP-IT 1 M NaOH. cDNA was purified using 10  $\mu$ l  
854 MyONE Silane beads and ligated to 5' linker SR\_DNA o/n at RT. After clean up, cDNA  
855 was quantified by qPCR using NEBNext universal and index primers (NEB E7335S).  
856 Libraries were indexed using NEBNext High-Fidelity PCR Master Mix (NEB M0541S) for  
857 11 cycles (size-matched input) or 15 cycles (hnRNP-C IP). Libraries were size selected  
858 by 1.0x AmpureXP beads (Beckman Coulter A63880), quantified by QuBit HS DNA and  
859 Bioanalyzer High Sensitivity DNA assay, and pooled for sequencing.



860 Data analysis

861 Preprocessing involved adapter cutting using cutadapt (v. 1.18)<sup>88</sup> and extracting the UMIs  
862 using umi\_tools (v 1.0.0)<sup>89</sup>. Alignment was achieved using GSNAP (v 2019-09-12)<sup>90</sup>.  
863 Reads were aligned to the human and adenovirus 5 genome simultaneously. After the  
864 alignment we used umi\_tools to deduplicate reads based on the UMIs, which was  
865 followed by removing all non-unique reads. We then used clipper (v0.1.4)<sup>91</sup> to find  
866 significant enriched IP peaks over the input on the human genome. To identify enriched  
867 peaks on the virus genome we employed a sliding window approach, by counting  
868 fragments overlapping 10bp wide windows along both the forward and reverse strand on  
869 the genome. If two consecutive windows were significantly enriched over input, they were  
870 merged into one peak. Motif analysis was conducted using the Homer suite<sup>92</sup>.

871

872 **Analyzing protein complexes by crosslinking**

873 Cells were crosslinked using disuccinimidyl suberate (DSS, Thermo Fisher) dissolved to  
874 100 mM in DMSO and further diluted to 0.1 mM, 0.3 mM and 1 mM in PBS. Cells seeded  
875 as a monolayer in 6-well plates were washed once with PBS, overlaid with 500 µl with  
876 PBS or the different DSS dilutions and incubated at room temperature for 30 min. The  
877 reaction was quenched by addition of 500 µl of 20 mM Tris-HCl pH 7.4, washed twice  
878 with PBS and further processed for immunoblot analysis.

879

880 **Di-glycine remnant profiling by mass spectrometry**

881 Cell lysis and initial desalting

882 Approximately 10 mg of input was generated from 5x15 cm plates of HeLa cells  
883 transduced with rAd E1B55K and rAd E4orf6 constructs for 0 h (mock), 6 h, 8 h, and 10  
884 h. Each timepoint was produced in biological triplicate. Cell were harvested with 0.25%  
885 Trypsin (Gibco), washed 1x in PBS, flash frozen in liquid nitrogen and stored at -80°C.  
886 Pellets were thawed, resuspended in 1 ml of lysis buffer (6 M urea, 2 M thiourea, in 50  
887 mM ammonium bicarbonate pH 8.0) with 1x Halt Protease Cocktail inhibitor solution, and  
888 incubated for ~5 min on ice. Samples were then diluted 10-fold in 50 mM ammonium  
889 bicarbonate, reduced with 10 mM DTT, alkylated with 20 mM iodoacetamide, and  
890 digested with trypsin protease overnight. Digestion was quenched by acidification to pH  
891 2 with trifluoroacetic acid (TFA) and samples were desalted over Waters tC18 SepPak  
892 cartridges (Cat#: 036805). A 10% aliquot was set aside for global proteomic analysis and  
893 all samples were dried to completion.

#### 894 Di-glycine (K-ε-GG) enrichment, fractionation, and desalting

895 A Cell Signaling PTMScan ubiquitin remnant motif kit (Cat#: 5562) was used to enrich for  
896 peptides that had been ubiquitinated. Aliquoted beads were cross-linked for 30 minutes  
897 in 100 mM sodium borate and 20 mM dimethyl pimelimidate (Thermo Scientific), following  
898 the protocol outlined by Udeshi *et. al.*<sup>28</sup>. Tryptic peptides were resuspended in IAP buffer  
899 (50 mM MOPS, pH 7.2, 10 mM sodium phosphate, 50 mM NaCl) and immunoprecipitated  
900 with the provided antibody for 2 h at 4°C. Samples were eluted in LC-MS grade water  
901 (Thermo Fisher) with 0.15% v/v TFA and separated into either 3 high-pH fractions  
902 (enriched ubiquitinated peptides) or 7 high-pH fractions (global proteome) over C18  
903 columns (The Nest Group, MicroSpin column C18 silica, part#: SEM SS18V, lot#:

904 091317). Fractionated samples were desalted a final time over Oligo R3 reverse-phase  
905 resin (Thermo Scientific, Cat#:1-1339-03).

906 Data acquisition and search parameters

907 All solvents used in analysis of MS samples were LC-MS grade. Samples were analyzed  
908 with an Easy-nLC system (Thermo Fisher) running 0.1% v/v formic acid (Buffer A) and  
909 80% v/v acetonitrile with 0.1% v/v formic acid (Buffer B), coupled to an Orbitrap Fusion  
910 Tribrid mass spectrometer. Peptides were separated using a 75  $\mu\text{m}$  i.d. silica capillary  
911 column packed in-house with Repro-Sil Pur C18-AQ 3  $\mu\text{m}$  resin and eluted with a gradient  
912 of 3-38% Buffer B over 85 minutes. Full MS scans from 300-1500 m/z were analyzed in  
913 the Orbitrap at 120,000 FWHM resolution and  $5 \times 10^5$  AGC target value, for 50 ms  
914 maximum injection time. Ions were selected for MS2 analysis with an isolation window of  
915 2 m/z, for a maximum injection time of 50 ms, to a target AGC of  $5 \times 10^4$ .

916 MS raw files were analyzed by MaxQuant software version 1.6.0.16, and MS2 spectra  
917 were searched against a target + reverse database with the Andromeda search engine  
918 using the Human UniProt FASTA database [9606] (reviewed, canonical entries;  
919 downloaded November 2017) and adenovirus serotype 5 UniProt FASTA database  
920 (reviewed, canonical entries; downloaded February 2018). The search included variable  
921 modifications of methionine oxidation, N-terminal acetylation, and GlyGly on lysine  
922 residues, with a fixed modification of carbamidomethyl cysteine. For global proteome  
923 samples, iBAQ quantification was performed on unique+razor peptides using unmodified,  
924 oxidized methionine, and N-terminally acetylated forms. Trypsin cleavage was specified  
925 with up to 2 missed cleavages allowed. Match between runs was enabled, but restricted  
926 to matches within a single biological replicate by separating replicates into independent

927 searches. Match between runs parameters included a retention time alignment window  
928 of 20 min and a match time window of 0.7 min. False discovery rate (FDR) was set to  
929 0.01.

930

## 931 **Proteomics and bioinformatics analysis**

### 932 Data normalization and filtering

933 MaxQuant output was filtered to remove identified contaminant and reverse proteins.  
934 MaxQuant “Intensity” and “iBAQ”<sup>93</sup> label free quantification values were used to measure  
935 abundances for the K-ε-GG and WCP data, respectively. Abundances were transformed  
936 to log<sub>2</sub> values, with unidentified values assigned as “NA”. K-ε-GG and WCP data were  
937 normalized separately. Data were normalized by subtracting the sample medians from  
938 log<sub>2</sub> transformed abundances within replicates. Both the KεGG and the WCP datasets  
939 were filtered at each timepoint to require quantification in at least 2 of 3 replicates to be  
940 included in the calculations of fold change, z-score, or for hypothesis testing. Data that  
941 contained less than 2 replicate quantifications in each timepoint was removed entirely  
942 from the analysis. Peptides or proteins are considered uniquely identified in one timepoint  
943 compared to another if there were at least 2 replicate quantifications for one timepoint  
944 and 0 replicate quantifications for the compared timepoint.

### 945 Fold change, p-value, and z-score calculations

946 The fold change across timepoints was calculated by comparing the log<sub>2</sub> transformed,  
947 normalized peptide or protein abundances for compared timepoints. Fold changes were  
948 calculated both on a per-replicate basis and by comparing averaged abundances across  
949 timepoints. Hypothesis testing was performed using unpaired, two-tailed Students t-tests,

950 when comparing log<sub>2</sub> transformed, normalized replicate abundances across timepoints.  
951 Hypothesis testing using one-sided t-tests, with null hypothesis of fold change equal 0,  
952 was implemented when evaluating log<sub>2</sub> fold changes. Multiple testing correction was not  
953 performed. Peptide ubiquitin intensity Z-scores were used to measure relative ubiquitin  
954 abundances for a peptide at the respective timepoint. Z-scores were calculated by  
955 averaging the peptide intensities for each replicate identification within the timepoint and  
956 comparing to the mean and standard deviation of averaged values within that timepoint.

#### 957 Protein ubiquitin abundance calculation

958 The di-glycine technique quantifies peptide-based abundance of the K- $\epsilon$ -GG modification.  
959 In order to quantify protein-based K- $\epsilon$ -GG abundance changes, we implemented a  
960 calculation to combine the peptide-based fold changes for cases in which multiple K- $\epsilon$ -  
961 GG peptides comprise a modified protein. If a single K- $\epsilon$ -GG peptide was identified for a  
962 modified protein, that K- $\epsilon$ -GG peptide abundance fold change represented the protein-  
963 based K- $\epsilon$ -GG fold change. For cases in which multiple K- $\epsilon$ -GG peptides were quantified  
964 for a single protein, the fold changes of each peptide were weighted by the abundance of  
965 that peptide and the weighted fold changes were averaged to calculate the protein-based  
966 K- $\epsilon$ -GG fold change. In cases for which a peptide was uniquely identified in the mock or  
967 10 h transduction timepoint, a log<sub>2</sub> fold change of plus or minus 7, respectively,  
968 representing the largest fold changes identified in the dataset, was assigned to this  
969 peptide. The K- $\epsilon$ -GG abundance log<sub>2</sub> fold changes, for each identified replicate, were  
970 normalized by the total protein abundance log<sub>2</sub> fold change of the corresponding replicate  
971 of the same protein in the corresponding whole cell proteome. The replicate-based  
972 normalized log<sub>2</sub> fold changes were averaged and hypothesis testing was performed for

973 the log<sub>2</sub> fold changes using onesided t-tests. The normalization of the K-ε-GG fold change  
974 by total protein fold change was performed to identify differentially increased or decreased  
975 ubiquitination, beyond what would be expected if modification abundance was driven  
976 solely by changes in total protein abundance.

#### 977 K-ε-GG and whole cell proteome comparison

978 The protein-based K-ε-GG and corresponding whole cell proteome data were compared  
979 to identify proteins that exhibited an increase in K-ε-GG abundance and to predict the  
980 effect of ubiquitination on total protein abundance. Proteins that exhibited a protein-  
981 based, normalized K-ε-GG log<sub>2</sub> fold change > 1 were classified as being increased in  
982 ubiquitination in response to E1B55K/E4orf6 expression. Proteins that exhibited whole  
983 cell proteome log<sub>2</sub> fold change greater than the mean fold change +/- 1 standard  
984 deviation, or which were uniquely identified in the 0 or 10 hour timepoint, were classified  
985 as increased or decreased in total protein abundance. Proteins for which total protein  
986 expression did not deviate more than +/- 1 standard deviation from the mean fold change  
987 were classified as unchanged in protein abundance in response to E1B55K/E4orf6  
988 expression. Proteins that were ubiquitinated and decreased in total protein abundance  
989 were predicted to be potential substrates of E1B55K/E4orf6 ubiquitin-mediated  
990 degradation. Proteins that were ubiquitinated and unchanged in total protein abundance  
991 were predicted to be non-degraded substrates of E1B55K/E4orf6.

#### 992 Gene ontology and protein-protein interaction network analysis

993 The proteins that exhibited increased protein-based ubiquitination were analyzed using  
994 the ReactomeFI plug-in (6.1.0)<sup>36</sup> within the Cytoscape network visualization software  
995 (3.4.0)<sup>94</sup>. The protein-protein interaction network was generated using the Gene Set

996 analysis within the "2016" ReactomeFI network version with "linker genes" included. The  
997 network was clustered using the in-built ReactomeFI clustering algorithm. Gene ontology  
998 "Molecular Function", "Biological Processes" and Reactome Pathway analysis was  
999 performed within the ReactomeFI application for the entire network as well as for each  
1000 clustered module. Network node attributes included size, which corresponded to degree  
1001 of increased ubiquitination, and color, which corresponded to total protein increase or  
1002 decrease. Network edges were set to non-directed, solid lines for all types of Reactome  
1003 protein-protein interactions.

1004

#### 1005 **Targeted hnRNP-C RBR-ID**

##### 1006 Cell growth

1007 Heavy and light media were prepared by supplementing SILAC DMEM (Thermo #88364)  
1008 with 800  $\mu$ M of Lysine (Sigma #L8662-25G) and 400  $\mu$ M Arginine (Sigma #A8094-25G)  
1009 for light or K8 (Silantes #211604102) and R10 isotopes (Silantes #201604102) for heavy,  
1010 and 120 mg/L Proline (Sigma #P0380-100G). Media was then filtered and adjusted to  
1011 10% dialyzed FBS (HyClone #SH30079.03) and 1% penicillin-streptomycin. Heavy  
1012 isotope labeling in HeLa cells was confirmed by mass spectrometry. Cells were either  
1013 mock-treated or infected with Ad5 WT Ad5 or  $\Delta$ E1B at an MOI of 10. At 20 hpi, media  
1014 was exchanged and heavy-labeled cells were pulsed with 500  $\mu$ M 4sU, with light-labeled  
1015 cells serving as non-treated controls. At 24 hpi, all samples were washed with cold PBS  
1016 and crosslinked at 1.0 J/cm<sup>2</sup> with 310 nm UV-B. Cells were then harvested, heavy/light  
1017 pairs were combined 1:1, and aliquoted for further analysis.

##### 1018 hnRNP-C IP

1019 Approximately  $1 \times 10^7$  pooled heavy and light HeLa cells were used for one hnRNP-C IP.  
1020 50  $\mu$ l of Protein G Dynabeads (Thermo Fisher) per sample were washed 3x in IP buffer  
1021 (20 mM HEPES-KOH pH 7.4, 110 mM potassium acetate, 2 mM  $MgCl_2$ , 0.1% Tween-20,  
1022 0.1% Triton, 150 mM NaCl, 1 mM DTT, 0.1 mM PMSF, 1x cOmplete Protease Inhibitor  
1023 Cocktail (Roche)) and incubated with 5  $\mu$ g of  $\alpha$ -hnRNP-C antibody rotating at RT for 1 h.  
1024 Cell pellets were resuspended in 500  $\mu$ l IP buffer, after 10 min 1.5  $\mu$ l benzonase (Sigma-  
1025 Aldrich, Cat#: E1014) were added and the sample was incubated for 1 h on ice. Samples  
1026 were sonicated with a Diagenode Biorupter on low setting for 30 s on and 30 s off for ten  
1027 rounds at 4 °C and spun at max speed (21,130 g) for 10 min at 4 °C. 450  $\mu$ l of sample  
1028 were added to washed beads and incubated rotating at 4 °C for 2 h. Beads were washed  
1029 3x with IP buffer before proteins were eluted in 0.1 M glycine (pH 2.4) for 10 min at RT,  
1030 and elution was quenched with an equal volume of 0.1 M Tris-HCl (pH 8.0).

#### 1031 Mass spectrometry sample prep

1032 Immunoprecipitated samples were reduced with 10 mM DTT for 30 min at RT and  
1033 alkylated with 20 mM iodoacetamide for 45 min at RT in the dark. Samples were adjusted  
1034 to 10 mM  $CaCl_2$  and split into two aliquots. One set of aliquots was digested at RT with  
1035 chymotrypsin at a ~1:25 ratio and the other with trypsin at a ~1:30 ratio. Digestions were  
1036 quenched after ~16 hrs by addition of TFA to pH 2. Samples were then desalted over  
1037 Oligo R3 reverse-phase resin (Thermo Scientific, Cat#1-1339-03).

#### 1038 Data acquisition

1039 Peptide quantification by LC-MS/MS was performed on a Thermo Fisher Ultimate 3000  
1040 Dionex™ liquid chromatography system and a Thermo Q-Exactive HF-X™ mass  
1041 spectrometer. The mobile phases consisted of 0.1% formic acid aqueous (mobile phase



1042 A) and 0.1% formic acid 80% acetonitrile (mobile phase B) with a gradient of 5-45% over  
1043 48 min and a 60 min total gradient. Samples were quantified by A<sub>280</sub> absorbance and 1  
1044 µg of each was injected. Trypsin samples were run with MS1 settings of 250-1100 m/z  
1045 window, a resolution of 60,000, AGC target of 5e5, and MIT (maximum inject time) of 54  
1046 ms. MS2 scans were collected in data dependent mode with a TopN loop count of 10,  
1047 resolution of 15,000, AGC target of 1e5, and MIT of 100ms. Chymotrypsin samples were  
1048 run on the same LC gradient with MS1 settings of 250-1100 m/z window, a resolution of  
1049 60,000, AGC target of 1e6, and MIT of 60 ms. MS2 scans were collected in data  
1050 dependent mode with a TopN loop count of 10, resolution of 15,000, AGC target of 5e5,  
1051 and MIT of 120ms. Fragmentation was performed with HCD using stepped normalized  
1052 collision energies (NCE) of 25, 27, 30%<sup>95</sup>.

### 1053 Data processing

1054 Data files were processed by Sequest™ within Proteome Discoverer™ (PD) 2.3 workflow  
1055 nodes. Searching parameters were set to find mass offsets of 8.014 Da for heavy K(+8)  
1056 lysine and 10.008 Da for heavy R(+10) arginine for the SILAC heavy pairs<sup>55</sup>. Additionally,  
1057 phosphorylation (79.966Da) and methylation (14.015Da) were searched on both viral and  
1058 host proteins. A human protein FASTA and adenovirus type 5 specific FASTA files  
1059 downloaded directly from Uniprot were used to process the raw files<sup>96</sup>. No imputation was  
1060 used across data files. A 1% FDR level cutoff was applied at the peptide level by  
1061 Percolator and the protein level. The use of Minora Feature Detector™ was used to  
1062 identify SILAC pairs and identify non-sequenced peptides between runs<sup>97</sup>. Post-  
1063 processing of the data files was performed in R Studio and peptide abundances were  
1064 normalized to their respective proteins. If each peptide was identified in each sample, the

1065 heavy/light pairs p-values were determined by a Student's t-test as previously used in  
1066 both the original RBR-ID paper<sup>53</sup> and the subsequent SILAC targeted RBR-ID paper<sup>54</sup>.  
1067 Score plots and fold change plots were generated using the mapping function from the  
1068 original RBR-ID paper<sup>53</sup>.

1069

### 1070 **hnRNP-C interactome analysis**

1071 In the targeted RBR-ID experiment, the “light” control sample contains the global  
1072 interactome data for the targeted protein, hnRNP-C, in the absence of any RNA-protein  
1073 crosslinking. The “light” control data for mock, Ad5 WT, and  $\Delta$ E1B infections were  
1074 compared to identify the proteins that interact with hnRNP-C in each of these conditions  
1075 and to quantify changes in interactions induced by WT or  $\Delta$ E1B infection. Three biological  
1076 replicates were generated for each condition and each biological replicate was analyzed  
1077 in two technical replicates. The “light” protein abundance data for each replicate was  
1078 transformed by log<sub>2</sub> and the identified protein abundances were normalized by the  
1079 abundance of hnRNP-C in the respective replicate. The protein abundance values for the  
1080 two technical replicates were averaged within each biological replicate. The protein  
1081 abundance values for the three biological replicates within each condition were then  
1082 averaged. When computing averages, unidentified values were not included in the  
1083 calculation. Z-scores were calculated by comparing the average abundance of the protein  
1084 in the respective condition to the mean and standard deviation of all averaged  
1085 abundances for that condition. The z-score was calculated only proteins with abundance  
1086 quantified in at least 2 replicates for the respective condition. Fold changes were  
1087 calculated by comparing protein average abundance values for compared conditions.

1088 Hypothesis testing was performed by using an unpaired t-test to compare log<sub>2</sub> normalized  
1089 protein abundance values for each replicate within compared conditions. Correlations  
1090 were analyzed for log<sub>2</sub> normalized abundances using the cor function (Pearson  
1091 correlation coefficient) and visualized using the corrplot package in the R software  
1092 environment<sup>98</sup>.

1093

### 1094 **Statistics and reproducibility**

1095 Each experiment was carried out at least in triplicate with reproducible results. The  
1096 sample size was chosen to provide enough statistical power apply parametric test  
1097 (unpaired, two-tailed Student's t-test unless otherwise noted). Details regarding statistical  
1098 analysis are reported in each figure legend and p-values for each analysis can be found  
1099 in **Supplementary Table 8**.

1100

### 1101 **Data availability**

1102 All mass spectrometry data for this study are deposited in the CHORUS database  
1103 (dataset identifier and DOI will be provided upon acceptance of manuscript). The seCLIP-  
1104 Seq data have been deposited in NCBI's Gene Expression Omnibus<sup>99</sup> and are accessible  
1105 through GEO Series accession number GSE145411  
1106 (<https://www.ncbi.nlm.nih.gov/geo/query/acc.cgi?acc=GSE145411>). Additional  
1107 supporting data are available from the corresponding author upon request.

1108

### 1109 **Code availability**

1110 The proteomics data were analyzed using standard methods. The implementation of the  
1111 analysis was performed using R software. The scripts are available from the  
1112 corresponding author upon request or can be accessed via GitHub.  
1113 <https://github.com/JosephDybas/AdenovirusProteomics>

1114

### 1115 **Acknowledgements**

1116 We thank members of the Weitzman Lab for insightful discussions and input. We thank  
1117 P. Choi for help with seCLIP-Seq, and G. Yeo and E. Van Nostrand for their input  
1118 regarding analysis of corresponding data. We are grateful to A. Berk, P. Branton, R.  
1119 Greenberg, G. Ketner, A. Levine, K. Lynch, D. Ornelles, J. Wilson, and H. Wodrich for  
1120 generous gifts of reagents. We thank S. Schaffer for technical advice, and D. Avgousti,  
1121 L. Busino, P. Choi, K. Lynch, and J. Weitzman for careful reading of the manuscript. We  
1122 thank the UPenn Cell and Developmental Biology Microscopy Core for imaging  
1123 assistance. This research was supported by NIAID grants R01-AI145266 (MDW), R01-  
1124 AI121321 (MDW) and R01-AI118891 (BAG), and NCI grant R01-CA97093 (MDW).  
1125 Additional support came from the NCI T32 Training Grant in Tumor Virology T32-  
1126 CA115299 (AMP) and Individual National Research Service Awards F32-AI147587  
1127 (JMD) and F32-AI138432 (AMP) from the National Institutes of Health.

1128

### 1129 **Author Contributions**

1130 M.D.W., C.H., J.M.D. and J.C.L. conceived of the project. C.H. performed the experiments  
1131 and received assistance from J.C.L., A.M.P. and E.T.K. C.H. prepared figures with input  
1132 from other authors. J.M.D. performed the bioinformatics and proteomics data analysis.

1133 J.C.L. and R.L. performed mass spectrometry. A.M.P. performed RNA FISH. A.M.P.,  
1134 C.E.P., and C.H. performed RT-qPCR, CLIP-qPCR, and seCLIP-Seq sample  
1135 preparation. K.E.H. performed bioinformatics analysis of seCLIP-Seq data. M.C.  
1136 performed microscopy. C.H., J.C.L., and E.T.K. performed immunoprecipitation. C.H.,  
1137 J.M.D., and M.D.W. wrote the manuscript with input from the other authors. M.D.W. and  
1138 B.A.G. supervised the research.

1139

1140

1141 **References**

- 1142
- 1143 1 Isaacson, M. K. & Ploegh, H. L. Ubiquitination, ubiquitin-like modifiers, and  
1144 deubiquitination in viral infection. *Cell host & microbe* **5**, 559-570 (2009).
- 1145 2 Luo, H. Interplay between the virus and the ubiquitin-proteasome system:  
1146 molecular mechanism of viral pathogenesis. *Curr Opin Virol* **17**, 1-10 (2016).
- 1147 3 Dybas, J. M., Herrmann, C. & Weitzman, M. D. Ubiquitination at the interface of  
1148 tumor viruses and DNA damage responses. *Curr Opin Virol* **32**, 40-47 (2018).
- 1149 4 Komander, D. & Rape, M. The ubiquitin code. *Annu Rev Biochem* **81**, 203-229  
1150 (2012).
- 1151 5 Oh, E., Akopian, D. & Rape, M. Principles of Ubiquitin-Dependent Signaling. *Annu*  
1152 *Rev Cell Dev Biol* **34**, 137-162 (2018).
- 1153 6 Kulathu, Y. & Komander, D. Atypical ubiquitylation - the unexplored world of  
1154 polyubiquitin beyond Lys48 and Lys63 linkages. *Nature reviews. Molecular cell*  
1155 *biology* **13**, 508-523 (2012).
- 1156 7 Petroski, M. D. & Deshaies, R. J. Function and regulation of cullin-RING ubiquitin  
1157 ligases. *Nature reviews. Molecular cell biology* **6**, 9-20 (2005).
- 1158 8 Querido, E. *et al.* Degradation of p53 by adenovirus E4orf6 and E1B55K proteins  
1159 occurs via a novel mechanism involving a Cullin-containing complex. *Genes Dev*  
1160 **15**, 3104-3117 (2001).
- 1161 9 Harada, J. N., Shevchenko, A., Shevchenko, A., Pallas, D. C. & Berk, A. J. Analysis  
1162 of the adenovirus E1B-55K-anchored proteome reveals its link to ubiquitination  
1163 machinery. *J Virol* **76**, 9194-9206 (2002).
- 1164 10 Babiss, L. E. & Ginsberg, H. S. Adenovirus type 5 early region 1b gene product is  
1165 required for efficient shutoff of host protein synthesis. *J Virol* **50**, 202-212 (1984).
- 1166 11 Babiss, L. E., Ginsberg, H. S. & Darnell, J. E., Jr. Adenovirus E1B proteins are  
1167 required for accumulation of late viral mRNA and for effects on cellular mRNA  
1168 translation and transport. *Mol Cell Biol* **5**, 2552-2558 (1985).
- 1169 12 Halbert, D. N., Cutt, J. R. & Shenk, T. Adenovirus early region 4 encodes functions  
1170 required for efficient DNA replication, late gene expression, and host cell shutoff.  
1171 *J Virol* **56**, 250-257 (1985).
- 1172 13 Pilder, S., Moore, M., Logan, J. & Shenk, T. The adenovirus E1B-55K transforming  
1173 polypeptide modulates transport or cytoplasmic stabilization of viral and host cell  
1174 mRNAs. *Mol Cell Biol* **6**, 470-476 (1986).
- 1175 14 Bridge, E. & Ketner, G. Redundant control of adenovirus late gene expression by  
1176 early region 4. *J Virol* **63**, 631-638 (1989).
- 1177 15 Bridge, E. & Ketner, G. Interaction of adenoviral E4 and E1b products in late gene  
1178 expression. *Virology* **174**, 345-353 (1990).
- 1179 16 Sandler, A. B. & Ketner, G. Adenovirus early region 4 is essential for normal  
1180 stability of late nuclear RNAs. *J Virol* **63**, 624-630 (1989).
- 1181 17 Woo, J. L. & Berk, A. J. Adenovirus ubiquitin-protein ligase stimulates viral late  
1182 mRNA nuclear export. *J Virol* **81**, 575-587 (2007).
- 1183 18 Blanchette, P. *et al.* Control of mRNA export by adenovirus E4orf6 and E1B55K  
1184 proteins during productive infection requires E4orf6 ubiquitin ligase activity. *J Virol*  
1185 **82**, 2642-2651 (2008).

- 1186 19 Querido, E. *et al.* Regulation of p53 levels by the E1B 55-kilodalton protein and  
1187 E4orf6 in adenovirus-infected cells. *J Virol* **71**, 3788-3798 (1997).
- 1188 20 Stracker, T. H., Carson, C. T. & Weitzman, M. D. Adenovirus oncoproteins  
1189 inactivate the Mre11-Rad50-NBS1 DNA repair complex. *Nature* **418**, 348-352  
1190 (2002).
- 1191 21 Baker, A., Rohleder, K. J., Hanakahi, L. A. & Ketner, G. Adenovirus E4 34k and  
1192 E1b 55k oncoproteins target host DNA ligase IV for proteasomal degradation. *J*  
1193 *Virol* **81**, 7034-7040 (2007).
- 1194 22 Dallaire, F., Blanchette, P., Groitl, P., Dobner, T. & Branton, P. E. Identification of  
1195 integrin alpha3 as a new substrate of the adenovirus E4orf6/E1B 55-kilodalton E3  
1196 ubiquitin ligase complex. *J Virol* **83**, 5329-5338 (2009).
- 1197 23 Orazio, N. I., Naeger, C. M., Karlseder, J. & Weitzman, M. D. The adenovirus  
1198 E1b55K/E4orf6 complex induces degradation of the Bloom helicase during  
1199 infection. *J Virol* **85**, 1887-1892 (2011).
- 1200 24 Cathomen, T. & Weitzman, M. D. A functional complex of adenovirus proteins E1B-  
1201 55kDa and E4orf6 is necessary to modulate the expression level of p53 but not its  
1202 transcriptional activity. *J Virol* **74**, 11407-11412 (2000).
- 1203 25 Carson, C. T. *et al.* The Mre11 complex is required for ATM activation and the  
1204 G2/M checkpoint. *Embo j* **22**, 6610-6620 (2003).
- 1205 26 Schwartz, R. A. *et al.* Distinct requirements of adenovirus E1b55K protein for  
1206 degradation of cellular substrates. *J Virol* **82**, 9043-9055 (2008).
- 1207 27 Xu, G., Paige, J. S. & Jaffrey, S. R. Global analysis of lysine ubiquitination by  
1208 ubiquitin remnant immunoaffinity profiling. *Nature biotechnology* **28**, 868-873  
1209 (2010).
- 1210 28 Udeshi, N. D., Mertins, P., Svinkina, T. & Carr, S. A. Large-scale identification of  
1211 ubiquitination sites by mass spectrometry. *Nat Protoc* **8**, 1950-1960 (2013).
- 1212 29 Soucy, T. A. *et al.* An inhibitor of NEDD8-activating enzyme as a new approach to  
1213 treat cancer. *Nature* **458**, 732-736 (2009).
- 1214 30 Hori, T. *et al.* Covalent modification of all members of human cullin family proteins  
1215 by NEDD8. *Oncogene* **18**, 6829-6834 (1999).
- 1216 31 Schwechheimer, C. NEDD8-its role in the regulation of Cullin-RING ligases. *Curr*  
1217 *Opin Plant Biol* **45**, 112-119 (2018).
- 1218 32 Zhou, P. & Howley, P. M. Ubiquitination and degradation of the substrate  
1219 recognition subunits of SCF ubiquitin-protein ligases. *Mol Cell* **2**, 571-580 (1998).
- 1220 33 Tudek, A., Schmid, M. & Jensen, T. H. Escaping nuclear decay: the significance  
1221 of mRNA export for gene expression. *Curr Genet* **65**, 473-476 (2019).
- 1222 34 Stewart, M. Polyadenylation and nuclear export of mRNAs. *The Journal of*  
1223 *biological chemistry* **294**, 2977-2987 (2019).
- 1224 35 Marcellus, R. C., Teodoro, J. G., Charbonneau, R., Shore, G. C. & Branton, P. E.  
1225 Expression of p53 in Saos-2 osteosarcoma cells induces apoptosis which can be  
1226 inhibited by Bcl-2 or the adenovirus E1B-55 kDa protein. *Cell Growth Differ* **7**,  
1227 1643-1650 (1996).
- 1228 36 Fabregat, A. *et al.* The Reactome Pathway Knowledgebase. *Nucleic Acids Res* **46**,  
1229 D649-D655 (2018).
- 1230 37 [www.proteinatlas.org](http://www.proteinatlas.org).

- 1231 38 König, J. *et al.* iCLIP reveals the function of hnRNP particles in splicing at individual  
1232 nucleotide resolution. *Nat Struct Mol Biol* **17**, 909-915 (2010).
- 1233 39 McCloskey, A., Taniguchi, I., Shinmyozu, K. & Ohno, M. hnRNP C tetramer  
1234 measures RNA length to classify RNA polymerase II transcripts for export. *Science*  
1235 **335**, 1643-1646 (2012).
- 1236 40 Zarnack, K. *et al.* Direct competition between hnRNP C and U2AF65 protects the  
1237 transcriptome from the exonization of Alu elements. *Cell* **152**, 453-466 (2013).
- 1238 41 Cornella, N. *et al.* The hnRNP RALY regulates transcription and cell proliferation  
1239 by modulating the expression of specific factors including the proliferation marker  
1240 E2F1. *The Journal of biological chemistry* **292**, 19674-19692 (2017).
- 1241 42 Rossi, A. *et al.* Identification and dynamic changes of RNAs isolated from RALY-  
1242 containing ribonucleoprotein complexes. *Nucleic Acids Res* **45**, 6775-6792 (2017).
- 1243 43 Bondy-Chorney, E. *et al.* RNA binding protein RALY promotes Protein Arginine  
1244 Methyltransferase 1 alternatively spliced isoform v2 relative expression and  
1245 metastatic potential in breast cancer cells. *Int J Biochem Cell Biol* **91**, 124-135  
1246 (2017).
- 1247 44 van Eekelen, C. *et al.* Sequence dependent interaction of hnRNP proteins with late  
1248 adenoviral transcripts. *Nucleic Acids Res* **10**, 7115-7131 (1982).
- 1249 45 Tenzer, S. *et al.* Proteome-wide characterization of the RNA-binding protein RALY-  
1250 interactome using the in vivo-biotinylation-pulldown-quant (iBioPQ) approach. *J*  
1251 *Proteome Res* **12**, 2869-2884 (2013).
- 1252 46 Graham, F. L., Smiley, J., Russell, W. C. & Nairn, R. Characteristics of a human  
1253 cell line transformed by DNA from human adenovirus type 5. *The Journal of*  
1254 *general virology* **36**, 59-74 (1977).
- 1255 47 Mevissen, T. E. T. & Komander, D. Mechanisms of Deubiquitinase Specificity and  
1256 Regulation. *Annu Rev Biochem* **86**, 159-192 (2017).
- 1257 48 Chahal, J. S. & Flint, S. J. Timely synthesis of the adenovirus type 5 E1B 55-  
1258 kilodalton protein is required for efficient genome replication in normal human cells.  
1259 *J Virol* **86**, 3064-3072 (2012).
- 1260 49 Mashtalir, N. *et al.* Autodeubiquitination protects the tumor suppressor BAP1 from  
1261 cytoplasmic sequestration mediated by the atypical ubiquitin ligase UBE2O. *Mol*  
1262 *Cell* **54**, 392-406 (2014).
- 1263 50 Bridge, E. & Pettersson, U. Nuclear organization of adenovirus RNA biogenesis.  
1264 *Exp Cell Res* **229**, 233-239 (1996).
- 1265 51 Pombo, A., Ferreira, J., Bridge, E. & Carmo-Fonseca, M. Adenovirus replication  
1266 and transcription sites are spatially separated in the nucleus of infected cells.  
1267 *EMBO J* **13**, 5075-5085 (1994).
- 1268 52 Huang, M. *et al.* The C-protein tetramer binds 230 to 240 nucleotides of pre-mRNA  
1269 and nucleates the assembly of 40S heterogeneous nuclear ribonucleoprotein  
1270 particles. *Mol Cell Biol* **14**, 518-533 (1994).
- 1271 53 He, C. *et al.* High-Resolution Mapping of RNA-Binding Regions in the Nuclear  
1272 Proteome of Embryonic Stem Cells. *Mol Cell* **64**, 416-430 (2016).
- 1273 54 Zhang, Q. *et al.* RNA exploits an exposed regulatory site to inhibit the enzymatic  
1274 activity of PRC2. *Nat Struct Mol Biol* **26**, 237-247 (2019).



- 1275 55 Ong, S. E. *et al.* Stable isotope labeling by amino acids in cell culture, SILAC, as  
1276 a simple and accurate approach to expression proteomics. *Mol Cell Proteomics* **1**,  
1277 376-386 (2002).
- 1278 56 Gorlach, M., Burd, C. G. & Dreyfuss, G. The determinants of RNA-binding  
1279 specificity of the heterogeneous nuclear ribonucleoprotein C proteins. *The Journal*  
1280 *of biological chemistry* **269**, 23074-23078 (1994).
- 1281 57 Van Nostrand, E. L. *et al.* A Large-Scale Binding and Functional Map of Human  
1282 RNA Binding Proteins. *bioRxiv*, 179648 (2018).
- 1283 58 Van Nostrand, E. L. *et al.* Robust transcriptome-wide discovery of RNA-binding  
1284 protein binding sites with enhanced CLIP (eCLIP). *Nat Methods* **13**, 508-514  
1285 (2016).
- 1286 59 Dallaire, F., Blanchette, P. & Branton, P. E. A proteomic approach to identify  
1287 candidate substrates of human adenovirus E4orf6-E1B55K and other viral cullin-  
1288 based E3 ubiquitin ligases. *J Virol* **83**, 12172-12184 (2009).
- 1289 60 Evans, V. C. *et al.* De novo derivation of proteomes from transcriptomes for  
1290 transcript and protein identification. *Nat Methods* **9**, 1207-1211 (2012).
- 1291 61 Fu, Y. R. *et al.* Comparison of protein expression during wild-type, and E1B-55k-  
1292 deletion, adenovirus infection using quantitative time-course proteomics. *The*  
1293 *Journal of general virology* **98**, 1377-1388 (2017).
- 1294 62 Hung, G. & Flint, S. J. Normal human cell proteins that interact with the adenovirus  
1295 type 5 E1B 55kDa protein. *Virology* **504**, 12-24 (2017).
- 1296 63 Cheng, C. Y. *et al.* The E4orf6/E1B55K E3 ubiquitin ligase complexes of human  
1297 adenoviruses exhibit heterogeneity in composition and substrate specificity. *J Virol*  
1298 **85**, 765-775 (2011).
- 1299 64 Pancholi, N. J. & Weitzman, M. D. Serotype-specific restriction of wild-type  
1300 adenoviruses by the cellular Mre11-Rad50-Nbs1 complex. *Virology* **518**, 221-231  
1301 (2018).
- 1302 65 Vassileva, M. T. & Matunis, M. J. SUMO modification of heterogeneous nuclear  
1303 ribonucleoproteins. *Mol Cell Biol* **24**, 3623-3632 (2004).
- 1304 66 Chanarat, S. & Mishra, S. K. Emerging Roles of Ubiquitin-like Proteins in Pre-  
1305 mRNA Splicing. *Trends Biochem Sci* **43**, 896-907 (2018).
- 1306 67 Chan, C. H. *et al.* The Skp2-SCF E3 ligase regulates Akt ubiquitination, glycolysis,  
1307 herceptin sensitivity, and tumorigenesis. *Cell* **149**, 1098-1111 (2012).
- 1308 68 Lee, S. W. *et al.* Skp2-dependent ubiquitination and activation of LKB1 is essential  
1309 for cancer cell survival under energy stress. *Mol Cell* **57**, 1022-1033 (2015).
- 1310 69 Zhang, Q. *et al.* FBXW7 Facilitates Nonhomologous End-Joining via K63-Linked  
1311 Polyubiquitylation of XRCC4. *Mol Cell* **61**, 419-433 (2016).
- 1312 70 Bischoff, J. R. *et al.* An adenovirus mutant that replicates selectively in p53-  
1313 deficient human tumor cells. *Science* **274**, 373-376 (1996).
- 1314 71 Goodrum, F. D. & Ornelles, D. A. p53 status does not determine outcome of E1B  
1315 55-kilodalton mutant adenovirus lytic infection. *J Virol* **72**, 9479-9490 (1998).
- 1316 72 O'Shea, C. C. *et al.* Late viral RNA export, rather than p53 inactivation, determines  
1317 ONYX-015 tumor selectivity. *Cancer Cell* **6**, 611-623 (2004).
- 1318 73 Khandelia, P., Yap, K. & Makeyev, E. V. Streamlined platform for short hairpin  
1319 RNA interference and transgenesis in cultured mammalian cells. *Proceedings of*

- 1320 *the National Academy of Sciences of the United States of America* **108**, 12799-  
1321 12804 (2011).
- 1322 74 Grifman, M. *et al.* Overexpression of cyclin A inhibits augmentation of recombinant  
1323 adeno-associated virus transduction by the adenovirus E4orf6 protein. *J Virol* **73**,  
1324 10010-10019 (1999).
- 1325 75 Sobhian, B. *et al.* RAP80 targets BRCA1 to specific ubiquitin structures at DNA  
1326 damage sites. *Science* **316**, 1198-1202 (2007).
- 1327 76 Kozarsky, K. F., Jooss, K., Donahee, M., Strauss, J. F., 3rd & Wilson, J. M.  
1328 Effective treatment of familial hypercholesterolaemia in the mouse model using  
1329 adenovirus-mediated transfer of the VLDL receptor gene. *Nat Genet* **13**, 54-62  
1330 (1996).
- 1331 77 Komatsu, T., Dacheux, D., Kreppel, F., Nagata, K. & Wodrich, H. A Method for  
1332 Visualization of Incoming Adenovirus Chromatin Complexes in Fixed and Living  
1333 Cells. *PLoS One* **10**, e0137102 (2015).
- 1334 78 Reich, N. C., Sarnow, P., Duprey, E. & Levine, A. J. Monoclonal antibodies which  
1335 recognize native and denatured forms of the adenovirus DNA-binding protein.  
1336 *Virology* **128**, 480-484 (1983).
- 1337 79 Sarnow, P., Sullivan, C. A. & Levine, A. J. A monoclonal antibody detecting the  
1338 adenovirus type 5-E1b-58Kd tumor antigen: characterization of the E1b-58Kd  
1339 tumor antigen in adenovirus-infected and -transformed cells. *Virology* **120**, 510-  
1340 517 (1982).
- 1341 80 Marton, M. J., Baim, S. B., Ornelles, D. A. & Shenk, T. The adenovirus E4 17-  
1342 kilodalton protein complexes with the cellular transcription factor E2F, altering its  
1343 DNA-binding properties and stimulating E1A-independent accumulation of E2  
1344 mRNA. *J Virol* **64**, 2345-2359 (1990).
- 1345 81 Raj, A., van den Bogaard, P., Rifkin, S. A., van Oudenaarden, A. & Tyagi, S.  
1346 Imaging individual mRNA molecules using multiple singly labeled probes. *Nat*  
1347 *Methods* **5**, 877-879 (2008).
- 1348 82 Shaffer, S. M. *et al.* Rare cell variability and drug-induced reprogramming as a  
1349 mode of cancer drug resistance. *Nature* **546**, 431-435 (2017).
- 1350 83 Poling, B. C., Price, A. M., Luftig, M. A. & Cullen, B. R. The Epstein-Barr virus miR-  
1351 BHRF1 microRNAs regulate viral gene expression in cis. *Virology* **512**, 113-123  
1352 (2017).
- 1353 84 Russo, J., Heck, A. M., Wilusz, J. & Wilusz, C. J. Metabolic labeling and recovery  
1354 of nascent RNA to accurately quantify mRNA stability. *Methods* **120**, 39-48 (2017).
- 1355 85 Price, A. M., Messinger, J. E. & Luftig, M. A. c-Myc Represses Transcription of  
1356 Epstein-Barr Virus Latent Membrane Protein 1 Early after Primary B Cell Infection.  
1357 *J Virol* **92** (2018).
- 1358 86 Dolken, L. *et al.* High-resolution gene expression profiling for simultaneous kinetic  
1359 parameter analysis of RNA synthesis and decay. *RNA* **14**, 1959-1972 (2008).
- 1360 87 Van Nostrand, E. L. *et al.* Robust, Cost-Effective Profiling of RNA Binding Protein  
1361 Targets with Single-end Enhanced Crosslinking and Immunoprecipitation  
1362 (seCLIP). *Methods Mol Biol* **1648**, 177-200 (2017).
- 1363 88 Martin, M. Cutadapt removes adapter sequences from high-throughput  
1364 sequencing reads. *2011* **17**, 3 (2011).

- 1365 89 Smith, T., Heger, A. & Sudbery, I. UMI-tools: modeling sequencing errors in Unique  
1366 Molecular Identifiers to improve quantification accuracy. *Genome Res* **27**, 491-499  
1367 (2017).
- 1368 90 Wu, T. D. & Nacu, S. Fast and SNP-tolerant detection of complex variants and  
1369 splicing in short reads. *Bioinformatics* **26**, 873-881 (2010).
- 1370 91 Lovci, M. T. *et al.* Rbfox proteins regulate alternative mRNA splicing through  
1371 evolutionarily conserved RNA bridges. *Nat Struct Mol Biol* **20**, 1434-1442 (2013).
- 1372 92 Heinz, S. *et al.* Simple combinations of lineage-determining transcription factors  
1373 prime cis-regulatory elements required for macrophage and B cell identities. *Mol*  
1374 *Cell* **38**, 576-589 (2010).
- 1375 93 Schwanhaussner, B. *et al.* Global quantification of mammalian gene expression  
1376 control. *Nature* **473**, 337-342 (2011).
- 1377 94 Shannon, P. *et al.* Cytoscape: a software environment for integrated models of  
1378 biomolecular interaction networks. *Genome Res* **13**, 2498-2504 (2003).
- 1379 95 Jedrychowski, M. P. *et al.* Evaluation of HCD- and CID-type Fragmentation Within  
1380 Their Respective Detection Platforms For Murine Phosphoproteomics. *Molecular*  
1381 *& Cellular Proteomics* **10**, M111.009910 (2011).
- 1382 96 Consortium, T. U. UniProt: a worldwide hub of protein knowledge. *Nucleic Acids*  
1383 *Research* **47**, D506-D515 (2018).
- 1384 97 The, M., MacCoss, M. J., Noble, W. S. & Kall, L. Fast and Accurate Protein False  
1385 Discovery Rates on Large-Scale Proteomics Data Sets with Percolator 3.0. *J Am*  
1386 *Soc Mass Spectrom* **27**, 1719-1727 (2016).
- 1387 98 Wei, T. & Simko, V. R package "corrplot": Visualization of a Correlation Matrix  
1388 (Version 0.84). Available from <https://github.com/taiyun/corrplot> (2017).
- 1389 99 Edgar, R., Domrachev, M. & Lash, A. E. Gene Expression Omnibus: NCBI gene  
1390 expression and hybridization array data repository. *Nucleic Acids Res* **30**, 207-210  
1391 (2002).

1392

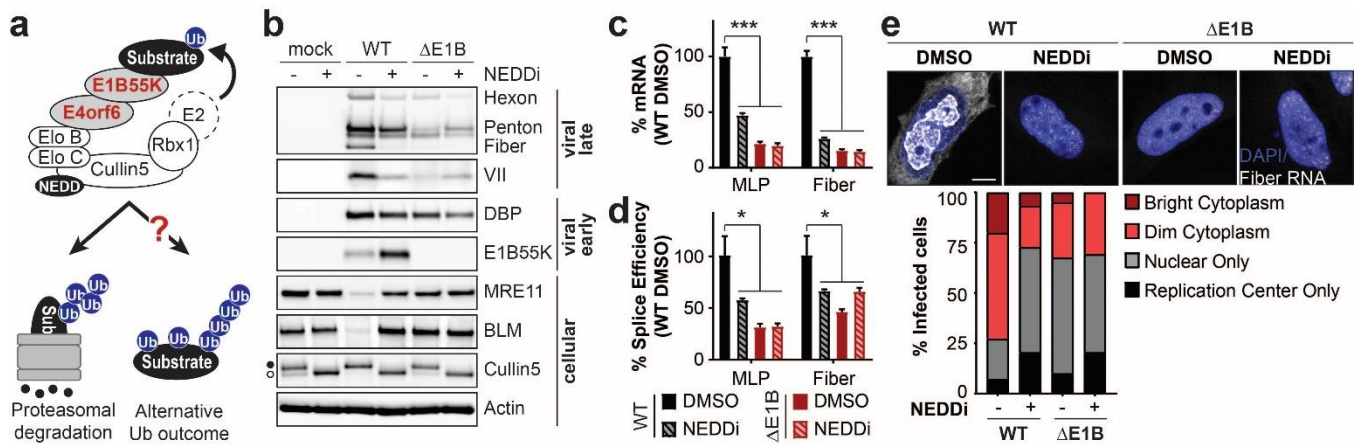

**Figure 1 | E1B55K deletion or inhibition of Cullin-mediated ubiquitination decreases adenovirus late RNA splicing and RNA processing overall.** **a**, The E1B55K/E4orf6 complex redirects substrate recognition of the host Cullin5 ubiquitin ligase to target proteins for proteasomal degradation or induce alternative outcomes of ubiquitination. **b-e**, HeLa cells infected with wild-type (WT) or E1B55K-deleted ( $\Delta$ E1B) Ad5 at multiplicity of infection (MOI) of 10. Cells were treated with either DMSO or NEDDi (neddylation inhibitor MLN4924) at 8 hours post-infection (hpi) and assayed at 24 hpi. **b**, Immunoblot analysis of viral and cellular protein abundance. The neddylated ( $\bullet$ ) and unmodified ( $\circ$ ) forms of Cullin5 are indicated. Results are representative of three biological experiments. **c**, Bar graph representing spliced RNA levels of viral late transcripts for the major late promoter (MLP) and fiber by quantitative reverse transcription PCR (RT-qPCR). Shown is mean+s.d., n equals three biological experiments. **d**, Bar graph representing splicing efficiency as the ratio of spliced to unspliced transcripts of MLP and fiber relative to the WT DMSO control by RT-qPCR. Shown is mean+s.d., n equals three biological experiments. **e**, RNA FISH visualizing the localization of fiber transcripts (white) in relation to nuclear DNA stained with DAPI (blue) and quantification of observed pattern for > 50 HeLa cells. Scale bar 10  $\mu$ m. Statistical significance was calculated using an unpaired, two-tailed Student's t-test, \*  $p < 0.05$ , \*\*\*  $p < 0.005$ .

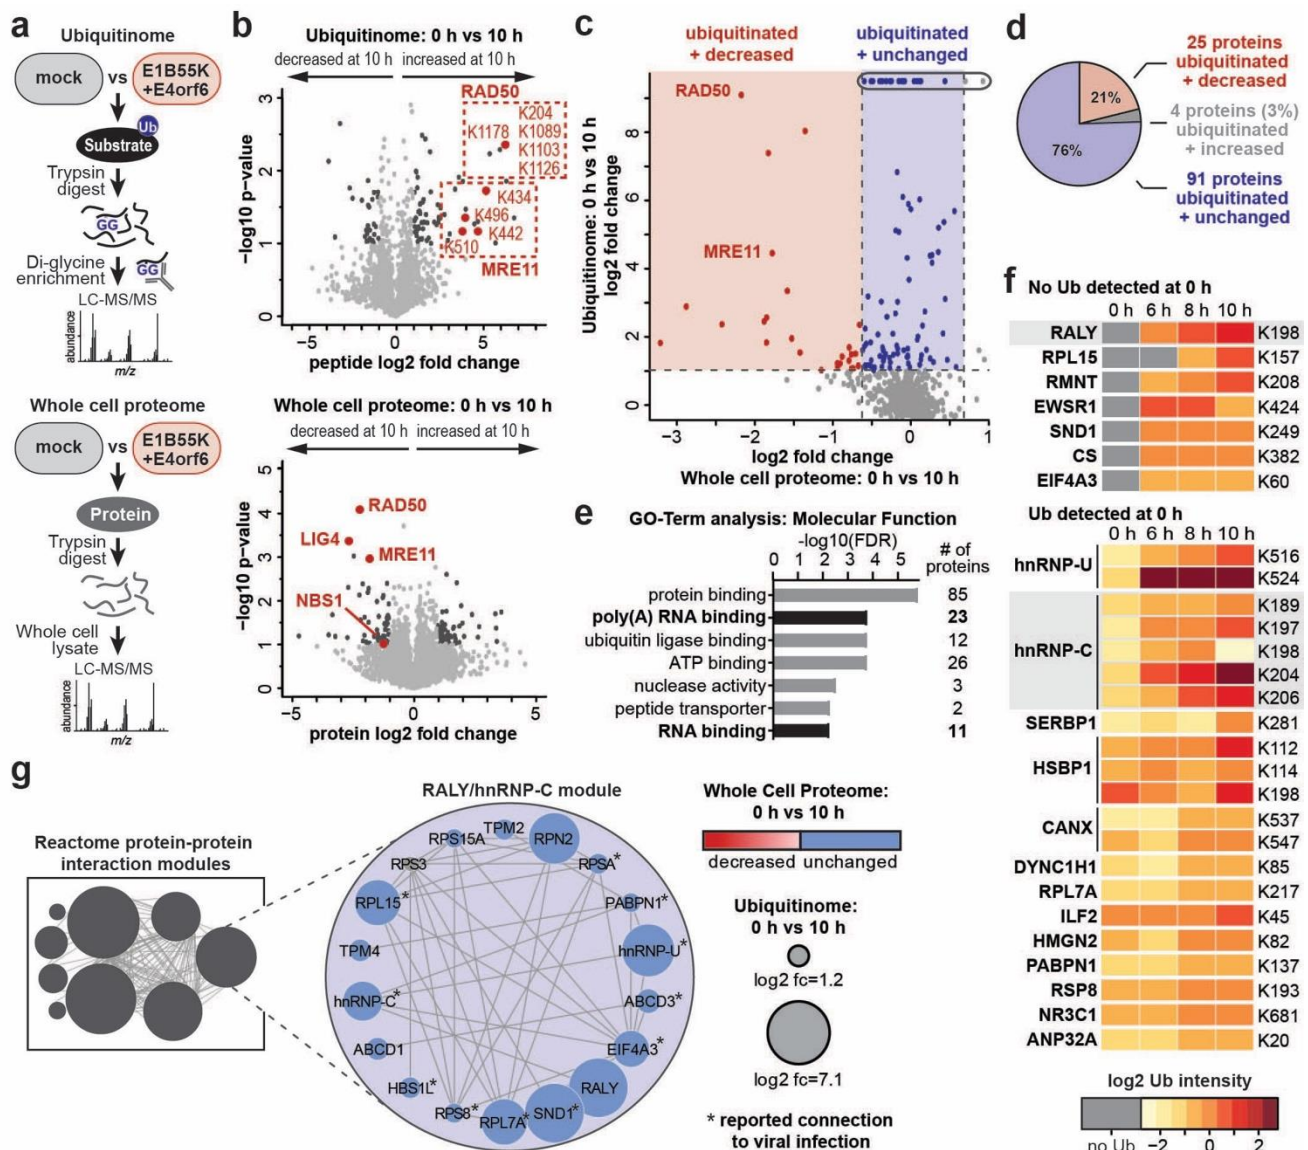

**Figure 2 | Unbiased proteomics reveals RNA-binding proteins among putative non-degraded substrates of the Ad E1B55K/E4orf6 complex.** **a**, Proteomics workflow for identification of E1B55K/E4orf6 substrates. HeLa cells were transduced with recombinant Ad vectors expressing E1B55K and E4orf6 (MOI=10), and subjected to both di-glycine remnant profiling (K-ε-GG) to identify ubiquitinated lysine residues and whole cell proteomics to determine protein abundance. **b**, Volcano plots showing log<sub>2</sub> fold-changes between 0 h and 10 h for ubiquitination (above) and protein abundance (below). For ubiquitination, individual peptides containing the modified lysine residues are normalized to protein abundance. Peptides and proteins with a fold change  $> \pm$ s.e.m. and p-value  $< 0.05$  are considered significantly changed and highlighted in dark grey. Ubiquitinated peptides and proteins corresponding to known E1B55K/E4orf6 substrates are highlighted in red. n equals three biological replicates. **c**, Scatter plot integrating changes in protein abundance (X-axis) and ubiquitination (Y-axis). Putative degraded substrates are shown in red (increased ubiquitination, decreased protein abundance), putative non-degraded substrates are shown in blue (increased ubiquitination, no significant change in protein abundance). Known degraded substrates MRE11 and RAD50 are indicated. Blue dots circled at the top indicate proteins that were only ubiquitinated upon expression of E1B55K/E4orf6 and were not detected as ubiquitinated in mock conditions. **d**, Bar graph representing gene ontology (GO) analysis of all predicted substrates by molecular functions. Categories containing RNA-binding proteins are highlighted. **e**, Predicted substrates that either decrease (red), increase (grey) or remain unchanged (blue) in their protein abundance during expression of E1B55K/E4orf6. **f**, Heat map of all ubiquitinated lysine residues within RNA-binding proteins with a normalized log<sub>2</sub> abundance z-score  $> -0.5$  and maximum log<sub>2</sub> fold-change  $> 1$  over the time course of E1B55K/E4orf6 transduction. The colors in the heat map correspond to the average z-score of the ubiquitination and are indicated in the accompanying scale. Highly ubiquitinated proteins RALY and hnRNP-C are highlighted. **g**, The Reactome-FI application in Cytoscape was utilized to generate a protein-protein interaction network in which nodes represent proteins and edges represent Reactome-based protein-protein interactions. Shown is the single module containing RALY and hnRNP-C. Node size corresponds to relative protein-based ubiquitination log<sub>2</sub> fold change and node color corresponds to whole cell proteome log<sub>2</sub> fold change following 10 h transduction of E1B55K/E4orf6. \* denotes proteins that have a reported role during different viral infections.

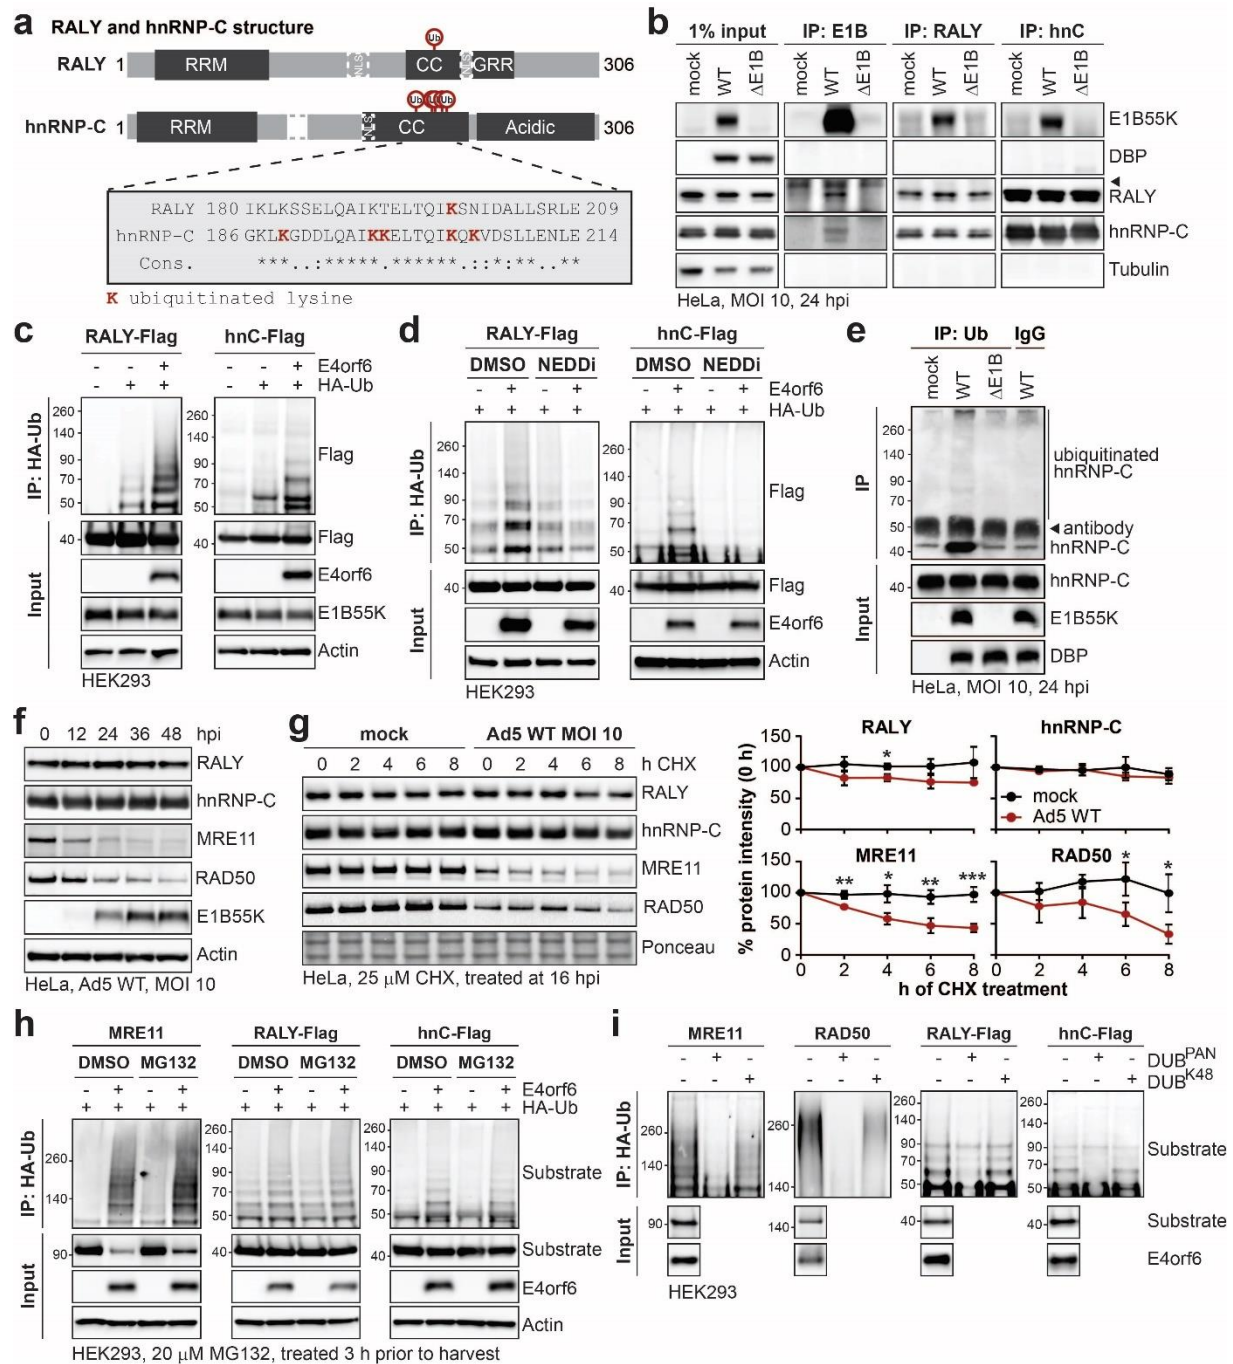

**Figure 3 | RALY and hnRNP-C are non-degraded substrates of the Ad E1B55K/E4orf6 complex ubiquitin ligase activity.**  
**a**, Domain structure of RALY and hnRNP-C. RRM = RNA recognition motif, NLS = nuclear localization sequence, CC = coiled-coil region, GRR = glycine rich region. CC region shown below contains all the lysine residues with increased ubiquitination upon E1B55K/E4orf6 expression highlighted in red. **b**, Immunoblot analysis of E1B55K, RALY, and hnRNP-C immunoprecipitations (IP) probing for pull-down of viral and cellular proteins during mock, WT and ΔE1B infection of HeLa cells at MOI of 10 for 24 hpi. The viral protein DBP and cellular protein Tubulin served as negative controls and were not isolated with any condition. ◀ denotes the signal of the antibody heavy chain. **c**, HEK293 cells transfected with the indicated constructs for 24 h followed by denaturing IP with HA antibody and immunoblot analysis of RALY-Flag or hnRNP-C-Flag. **d**, HEK293 cells transfected with the indicated constructs for 24 h and treated with DMSO or NEDDi 6 h prior to harvest followed by denaturing IP with HA antibody and immunoblot analysis of RALY-Flag or hnRNP-C-Flag. **e**, Immunoblot of denaturing hnRNP-C IP probing for ubiquitin during mock, WT and ΔE1B infections at MOI of 10 for 24 h. ◀ indicates non-specific signal of the antibody heavy chain. **f**, Immunoblot analysis of protein levels over a time course of Ad5 WT infection (MOI=10) of HeLa cells. **g**, Immunoblot analysis and quantification of RALY, hnRNP-C, MRE11, and RAD50 over a time course of cycloheximide (CHX) treatment of mock or Ad5 WT infected HeLa cells. Quantification showing mean+s.d. of three biological replicates. Statistical significance was calculated using an unpaired, two-tailed Student's t-test, \* p < 0.05, \*\* p < 0.01, \*\*\* p < 0.005. **h**, HEK293 cells transfected with the indicated constructs for 24 h

and treated with DMSO or proteasome inhibitor MG132 3 h prior to harvest followed by denaturing IP with HA antibody and immunoblot analysis of MRE11, RALY-Flag, and hnRNP-C-Flag. i, HEK293 cells transfected with the indicated constructs for 24 h followed by denaturing IP with HA antibody, treatment with the indicated deubiquitinating enzymes (DUBs) and immunoblot analysis of MRE11, RAD50, RALY-Flag, and hnRNP-C-Flag. All immunoblots are representative of at least three biological replicates. Size markers in kDa are shown for ubiquitination immunoblots.

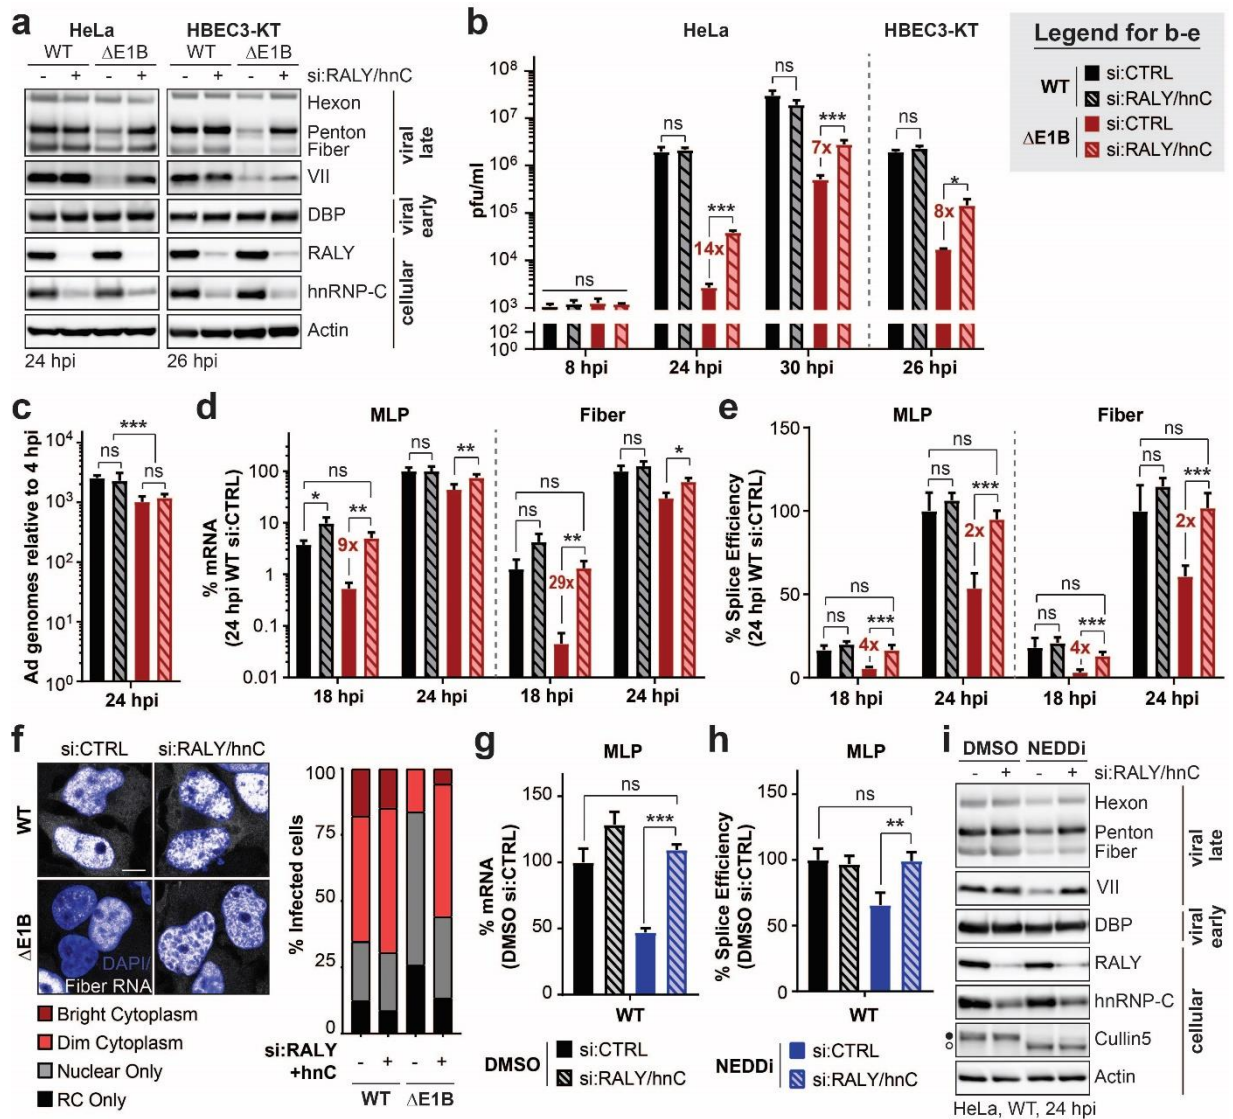

**Figure 4 | Knockdown of RALY and hnRNP-C rescues the RNA processing defect caused by the absence of a functional E1B55K/E4orf6 complex.** **a-f**, HeLa cells or HBEC3-KT (only a,b) transfected with control (si:CTRL) or RALY and hnRNP-C (si:RALY/hnC) siRNA 24 h prior to infection with Ad5 WT or  $\Delta E1B$  (MOI 10), harvested at respective time points. **a**, Immunoblot analysis of viral and cellular protein levels. **b**, Bar graph representing plaque assays for viral progeny. pfu = plaque forming units. **c**, Bar graph representing qPCR of viral genomes normalized to input. **d**, Bar graph representing spliced RNA levels of viral late transcripts MLP and fiber measured by RT-qPCR. **e**, Bar graph representing splicing efficiency as defined as the ratio of spliced to unspliced transcripts of MLP and fiber measured by RT-qPCR. **f**, RNA FISH visualizing the localization of fiber transcripts (white) in relation to nuclear DNA stained with DAPI (blue) and quantification of observed pattern for > 100 HeLa cells. RC – replication center. Scale bar 10  $\mu$ m. **g-i**, HeLa cells transfected with control (si:CTRL) or RALY and hnRNP-C (si:RALY/hnC) siRNA 24 h prior to infection with Ad5 WT (MOI=10), treated with either DMSO or NEDDi at 8 hpi and processed at 24 hpi. **g**, Bar graph representing spliced RNA levels of MLP measured by RT-qPCR. **h**, Bar graph representing splicing efficiency as defined as the ratio of spliced to unspliced transcripts of MLP measured by RT-qPCR. **i** Immunoblot analysis of viral and cellular protein levels, with neddylated ( $\bullet$ ) and unmodified ( $\circ$ ) forms of Cullin5 indicated. All immunoblots are representative of at least three biological experiments. All graphs show the mean+s.d. with n equals three biological replicates. Statistical significance was calculated using an unpaired, two-tailed Student's t-test, \*  $p < 0.05$ , \*\*  $p < 0.01$ , \*\*\*  $p < 0.005$ .



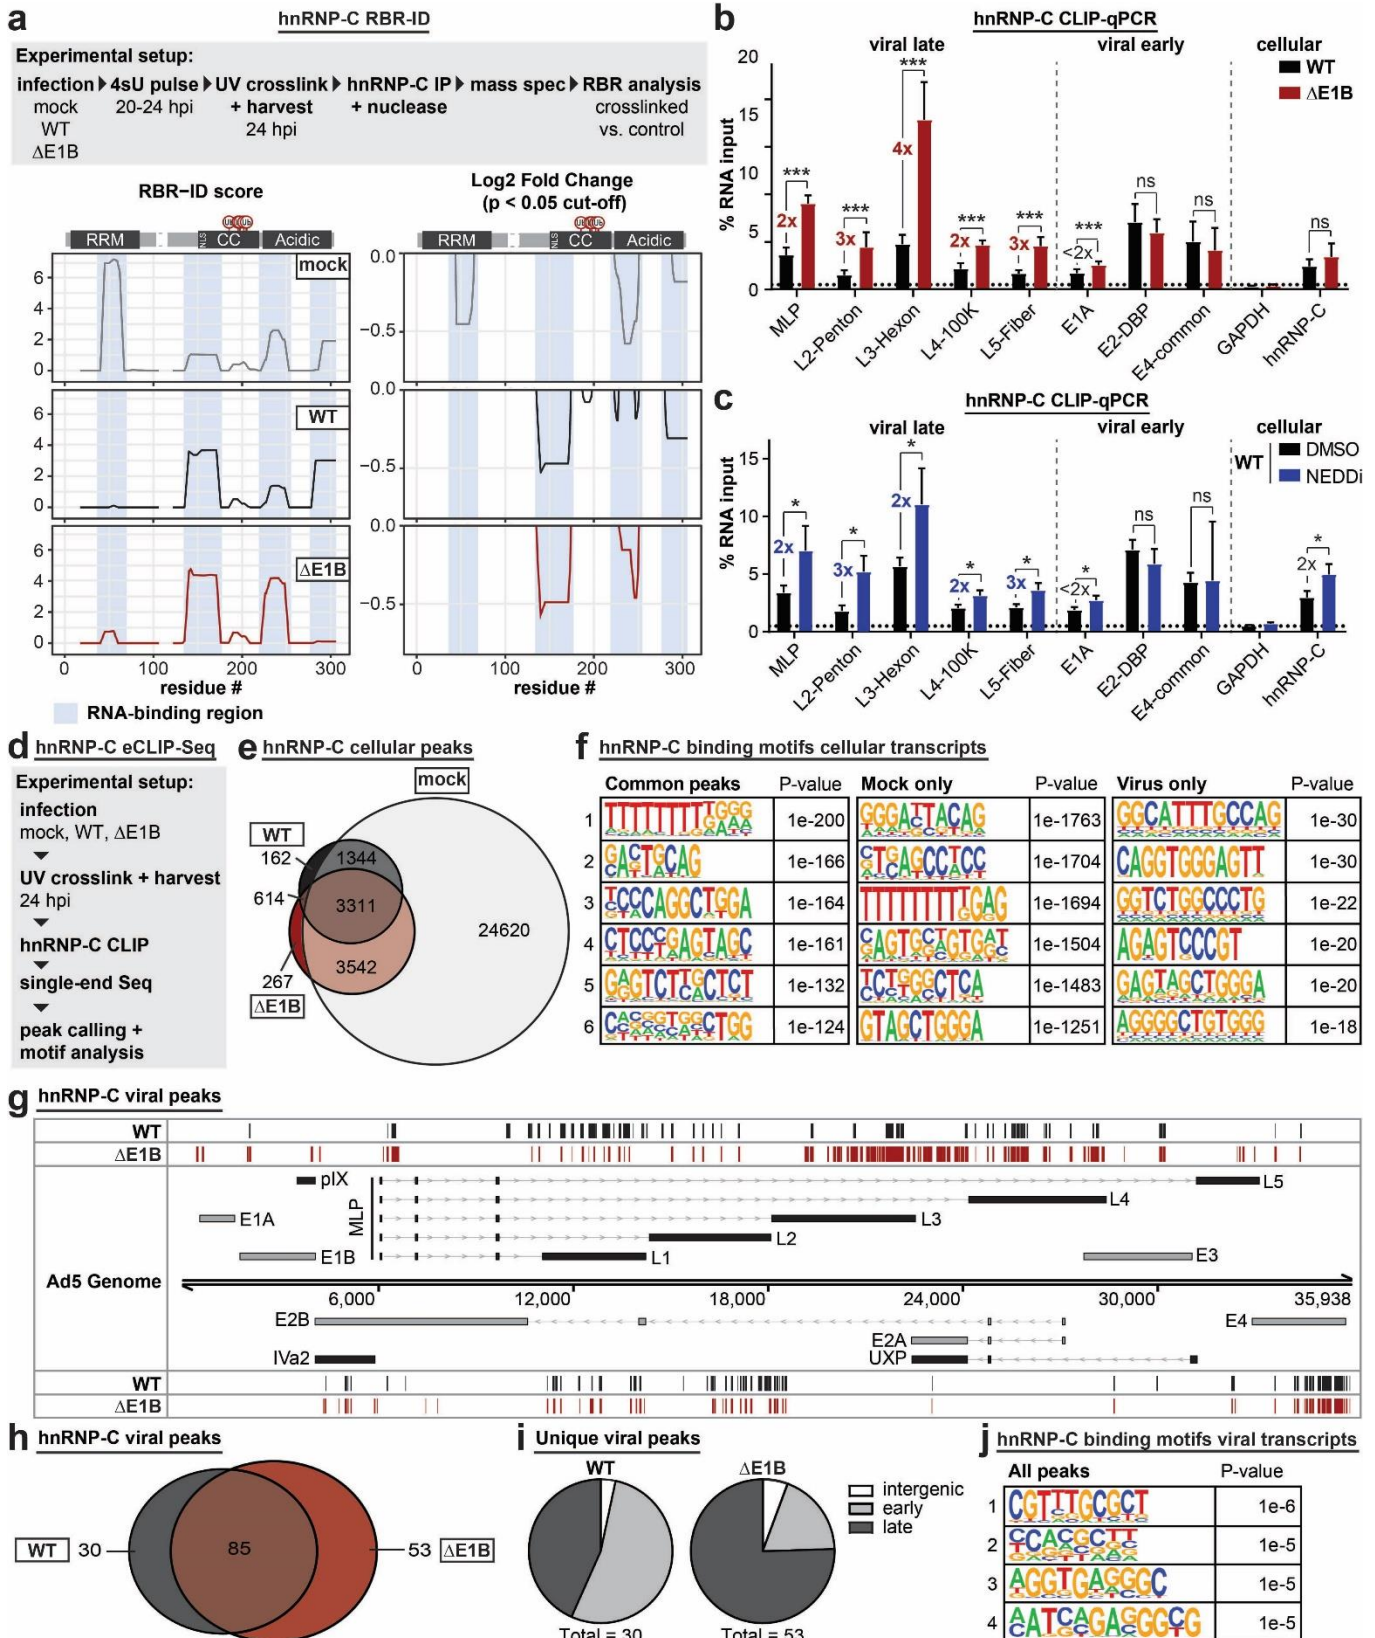

**Figure 5 | The interaction of hnRNP-C with viral late RNA increases in the absence of a functional E1B55K/E4orf6 complex.** **a**, RBR-ID (RNA-binding region identification) for hnRNP-C comparing mock (grey), Ad5 WT (black), and ΔE1B (red) at 24 hpi with MOI 10. Shown are the experimental setup (**above**), smoothed residue-level RBR-ID score plotted along the primary sequence (**left**), and smoothed residue-level fold-change between crosslinked and control conditions with a significance threshold of  $p < 0.05$  (**right**). hnRNP-C domain structure with ubiquitination sites is shown above graphs. RNA-binding regions are

highlighted in blue shaded area. **b**, HeLa cells infected with either WT Ad5 or  $\Delta E1B$  (MOI=10), UV-crosslinked and harvested at 24 hpi, subjected to hnRNP-C CLIP and RT-qPCR for viral early and late transcripts. GAPDH is a cellular negative control. hnRNP-C is a cellular positive control. **c**, HeLa cells infected with WT Ad5 (MOI=10), treated with either DMSO or NEDDi at 8 hpi, UV-crosslinked and harvested at 24 hpi, subjected to hnRNP-C CLIP and RT-qPCR for viral early and late transcripts. GAPDH is a cellular negative control. hnRNP-C is a cellular positive control. Graphs show mean+s.d, n equals six (b) or three (c) biological replicates. Statistical significance was calculated using an unpaired, two-tailed Student's t-test, \*  $p < 0.05$ , \*\*  $p < 0.01$ , \*\*\*  $p < 0.005$ . **d**, Experimental setup for hnRNP-C eCLIP-Seq. **e**, Venn diagram showing the overlap of hnRNP-C peaks called in host transcripts for mock (grey), Ad5 WT (black), and  $\Delta E1B$  (red). **f**, Top six motifs identified for hnRNP-C binding sites in host transcripts present in all 3 conditions (left), mock only (middle), and virus only (right, WT only +  $\Delta E1B$  only + WT and  $\Delta E1B$ ). **g**, hnRNP-C peaks called for Ad transcripts in Ad5 WT (black) and  $\Delta E1B$  (red) infection on the forward strand (above) and reverse strand (below). The simplified schematic of the viral transcriptome shows forward facing transcription units above the genome and reverse facing transcription units below. Viral genes are color-coded to denote early (grey) and late (black) transcription units. Lines with arrows denote introns and bars are exonic regions. **h**, Venn diagram showing the overlap of hnRNP-C peaks called in viral transcripts for Ad5 WT (black) and  $\Delta E1B$  (red). **i**, Pie charts of unique peaks for WT and  $\Delta E1B$  showing the location in intergenic, early, or late transcription units. **j**, Top four motifs identified for hnRNP-C binding sites in viral transcripts present in any of the conditions.

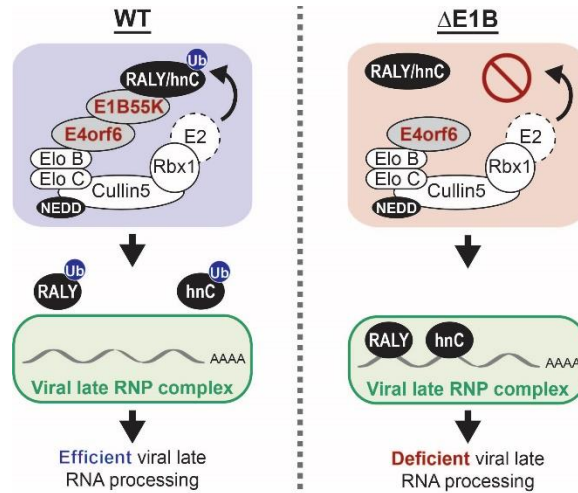

**Figure 6 | Non-degradative ubiquitination of RNA-binding proteins promotes efficient adenoviral RNA processing.** During wild-type (WT) Ad5 infection the E1B55K/E4orf6 complex induces ubiquitination of RNA-binding proteins RALY and hnRNP-C to facilitate efficient viral late RNA processing. Ubiquitination regulates interaction of these host proteins with viral RNA to facilitate viral infection. In the absence of the E1B55K/E4orf6 complex ubiquitin ligase activity, the RBPs bind more to viral late mRNAs and limit RNA processing and protein production. RNP – ribonucleoprotein.

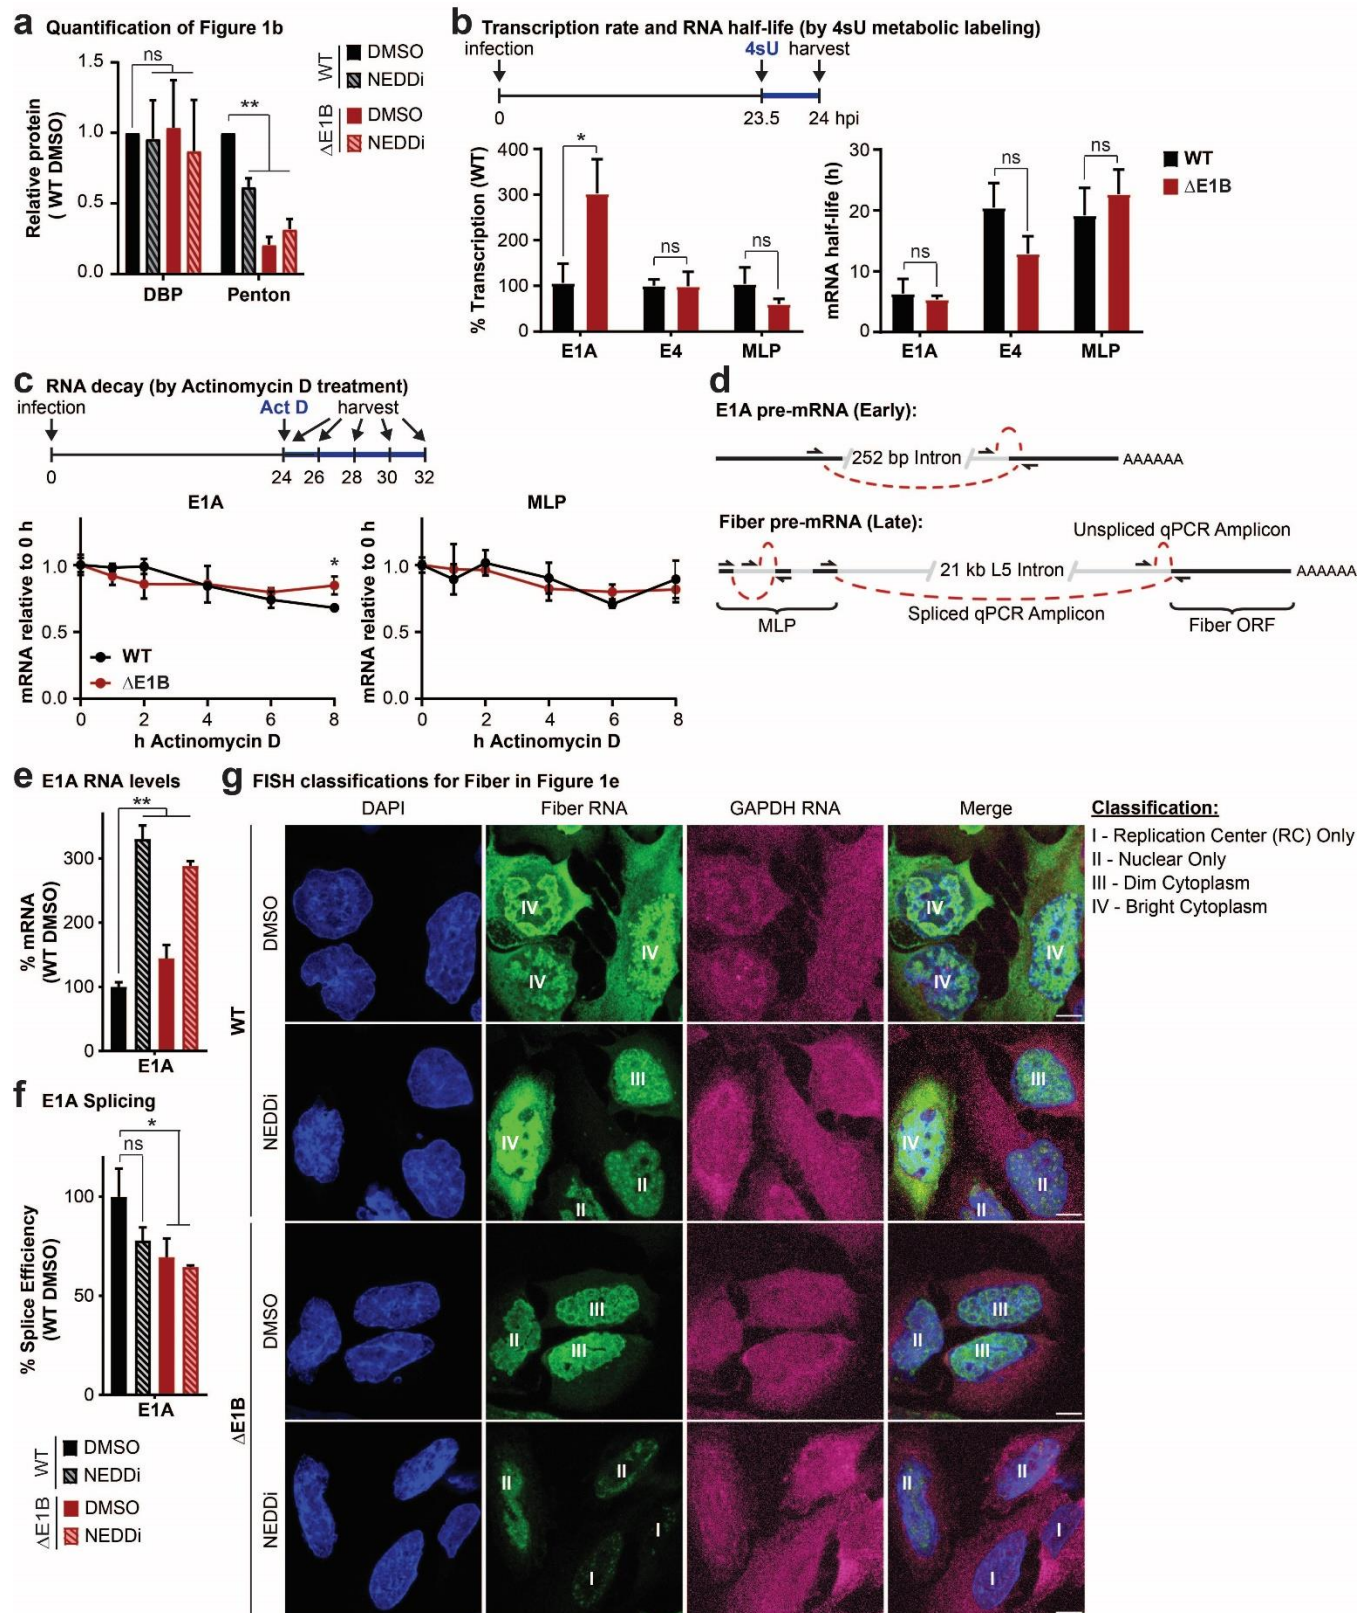

**Supplementary Figure 1 | E1B55K deletion or inhibition of Cullin-mediated ubiquitination does not decrease late RNA transcription and decay or early RNA processing.** **a**, Quantification of immunoblot shown in Figure 1b in triplicate. **b**, Analysis of nascent transcription and mRNA half-life by labeling RNA with 4-thiouridine (4sU) for 30 min at 23.5 hpi in HeLa cells infected with WT or ΔE1B Ad5 at MOI=10. Nascent 4sU-labeled RNA was purified for RT-qPCR for determining relative transcription rates of two early (E1A and E4) and one late (MLP) viral RNA. mRNA half-life was approximated using the ratio of nascent and total input RNA levels normalized to GAPDH. **c**, Analysis of decay of viral early (E1A) and late (MLP) RNA species by Actinomycin D

pulse at 24 hpi in HeLa cells infected with WT or  $\Delta$ E1B Ad5 at MOI 10 by normalization to input levels. **d**, Schematic illustrating primer design to differentiate spliced and unspliced viral transcripts. **e-g**, HeLa cells infected with WT or  $\Delta$ E1B Ad5 (MOI=10) in the presence of DMSO or NEDDi (neddylation inhibitor MLN2449) added at 8 hours post-infection (hpi). Cells were harvested for RNA analysis at 24 hpi. **e**, Bar graph representing spliced RNA levels of viral early transcripts E1A by RT-qPCR, **f**, Bar graph representing splicing efficiency as the ratio of spliced to unspliced transcripts of E1A relative to the WT DMSO control by RT-qPCR. **g**, RNA FISH visualizing the localization of fiber (green) and GAPDH (magenta) transcripts in relation to nuclear DNA stained with DAPI (blue). Nuclei are labeled with the classification of each cell according to the pattern of fiber used for Figure 1d. Scale bar 10  $\mu$ m. Shown is mean+s.d., n equals at least three biological experiments. Statistical significance was calculated using a paired (a) or unpaired (others), two-tailed Student's t-test, \*  $p < 0.05$ , \*\*  $p < 0.01$ .

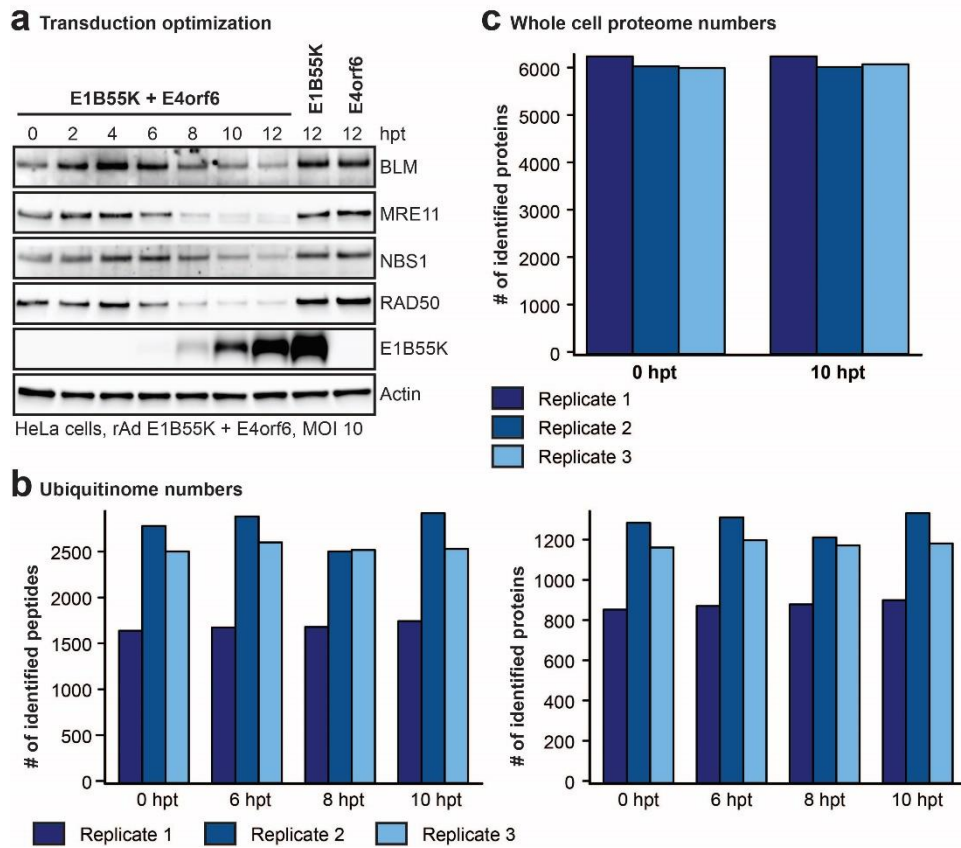

**Supplementary Figure 2 | Quantification of number of peptides and proteins identified in di-glycine remnant profiling and whole cell proteome data sets. a-c**, HeLa cells transduced with rAd E1B55K/E4orf6 at MOI 10. **a**, Immunoblot of time course of E1B55K/E4orf6 expression showing degradation kinetics of known substrates. hpt = hours post transduction. **b**, Numbers of peptides and corresponding proteins identified following K- $\epsilon$ -GG antibody enrichment in di-glycine remnant combined with mass spectrometry analysis at 0, 6, 8, and 10 hours post E1B55K/E4orf6 expression. **c**, Number of proteins identified by whole cell proteomics analysis at time 0 and 10 hours post E1B55K/E4orf6 expression. **b,c**, Dark blue, medium blue, and light blue bars indicate the counts for three individual biological replicates.

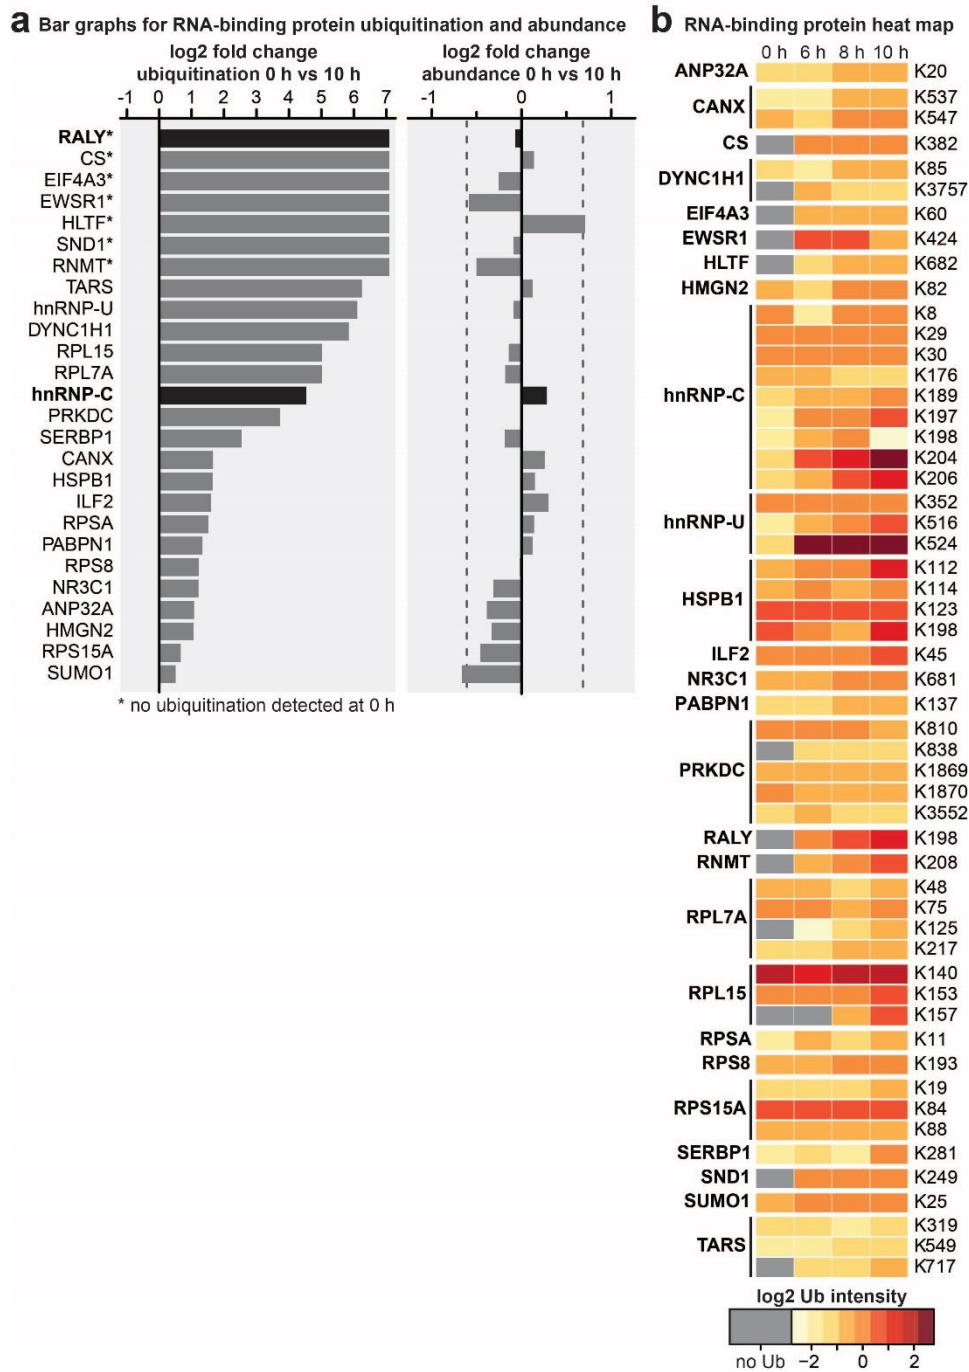

**Supplementary Figure 3 | Di-glycine remnant profiling and whole cell proteome data for RNA-binding proteins enriched within the predicted E1B55K/E4orf6 substrates. a-b,** Gene ontology analysis identified RNA-binding proteins enriched in the set of proteins that exhibited an increase in normalized protein-based ubiquitin abundance of log<sub>2</sub> fold change > 1 following 10 h transduction of E1B55K/E4orf6. **a,** Enriched RNA-binding protein, ubiquitination log<sub>2</sub> fold changes (left) and whole cell protein abundance log<sub>2</sub> fold changes (right) following 10 h transduction by E1B55K/E4orf6. **b,** Heat map showing relative ubiquitination of the respective lysine residues quantified by di-glycine remnant profiling analysis at 0, 6, 8, and 10 h of E1B55K/E4orf6 expression for peptides within enriched RNA-binding proteins. Heat map color gradient is based on low (yellow) to high (red) ubiquitin abundance and grey indicates “not identified” at that time point.

**a** Protein-protein interaction network of identified potential E1B55K/E4orf6 substrates

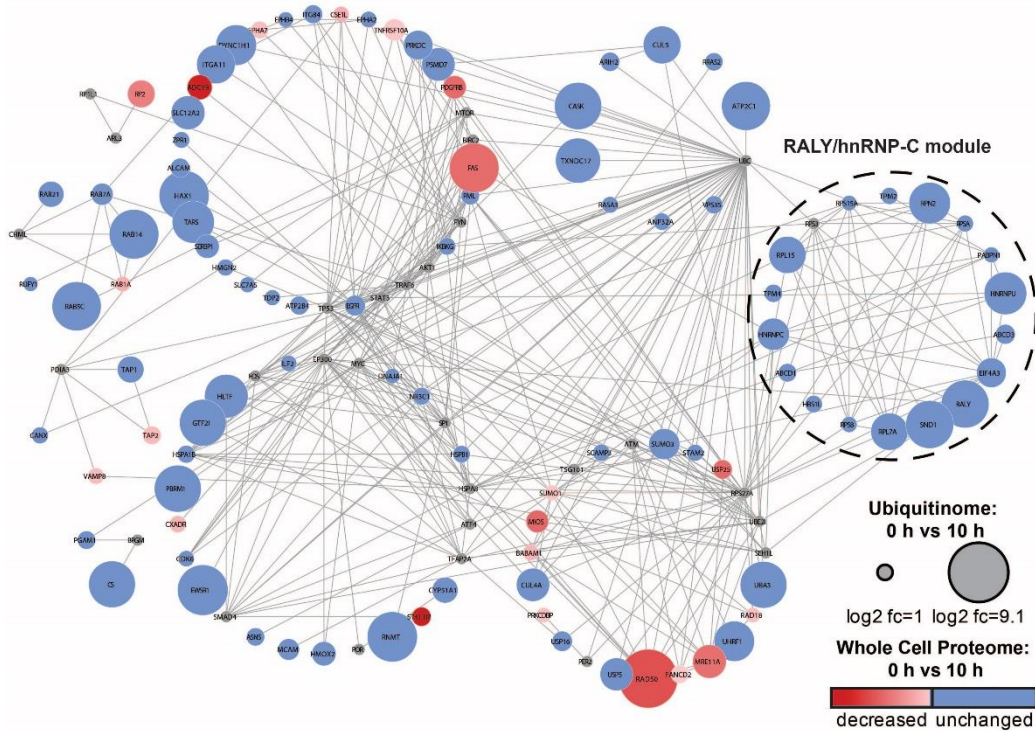

**b** GO-term analysis for RALY/hnRNP-C module

| Pathway                 | $-\log_{10}(\text{FDR})$ | # Genes |
|-------------------------|--------------------------|---------|
| Poly(A) RNA binding     | 6.61                     | 11      |
| RNA binding             | 5.14                     | 7       |
| Constituent of ribosome | 4.43                     | 5       |

**c** Bar graphs for RALY/hnRNP-C module ubiquitination and protein abundance

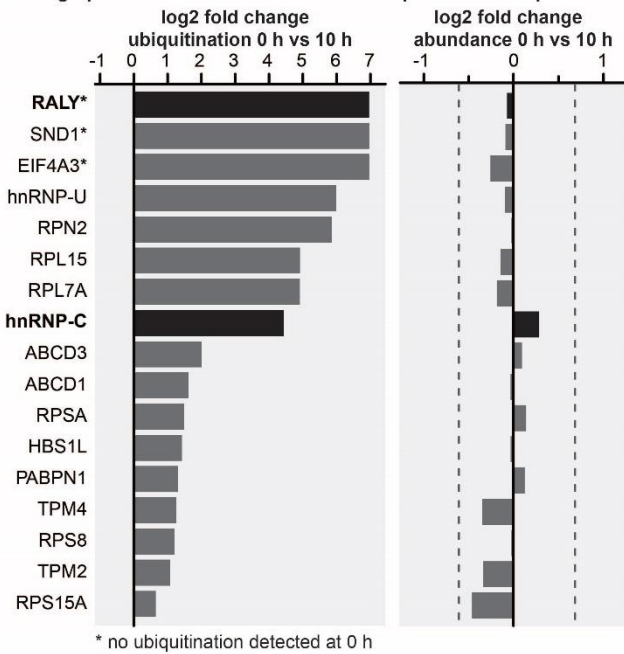

**d** Heat map for module

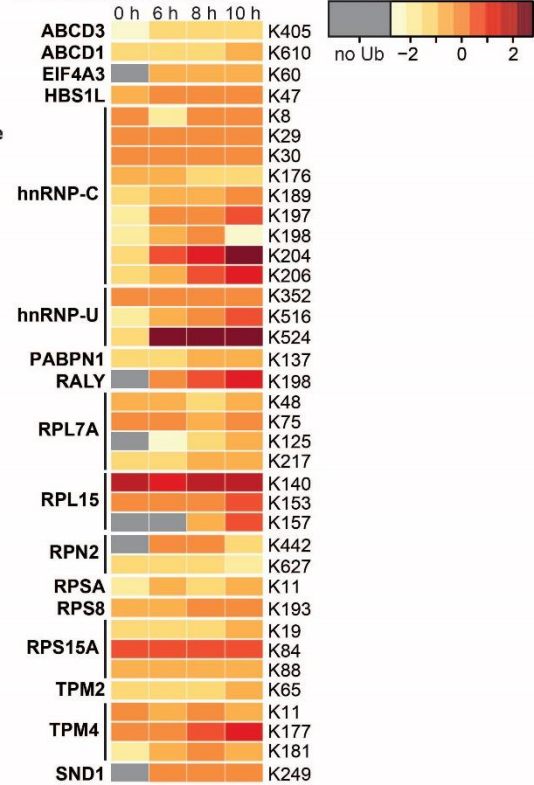

**Supplementary Figure 4 | Network analysis of predicted E1B55K/E4orf6 substrates identifies a “RALY/hnRNP-C module” enriched for RNA-binding proteins.** **a**, The Reactome-Fl application in Cytoscape was utilized to generate a protein-protein interaction network in which nodes represent proteins and edges represent Reactome-based protein-protein interactions. Node size corresponds to relative protein-based ubiquitination  $\log_2$  fold change and node color corresponds to whole cell proteome  $\log_2$  fold change following 10 h transduction of E1B55K/E4orf6. Protein-protein interaction network of proteins that exhibited normalized



protein-based ubiquitin abundance log<sub>2</sub> fold change > 1 following 10 h transduction of E1B55K/E4orf6. Reactome-FI interaction module analysis was performed to generate clusters of highly interacting proteins. **b**, Gene ontology analysis for molecular function identified enrichment of RNA-binding and Poly(A) RNA-binding proteins within the RALY/hnRNP-C network module shown in Figure 2g. **c**, RALY/hnRNP-C network module protein ubiquitin log<sub>2</sub> fold changes (left) and whole cell protein abundance log<sub>2</sub> fold changes (right) comparing 0 and 10 h post-transduction with E1B55K/E4orf6. **d**, Heat map showing relative ubiquitin abundance quantified by di-glycine remnant profiling analysis at 0, 6, 8, and 10 h post E1B55K/E4orf6 transduction for peptides from proteins within the RALY/hnRNP-C network module. Heat map color gradient is based on low (yellow) to high (red) ubiquitination and grey indicates “not identified” at that time point.

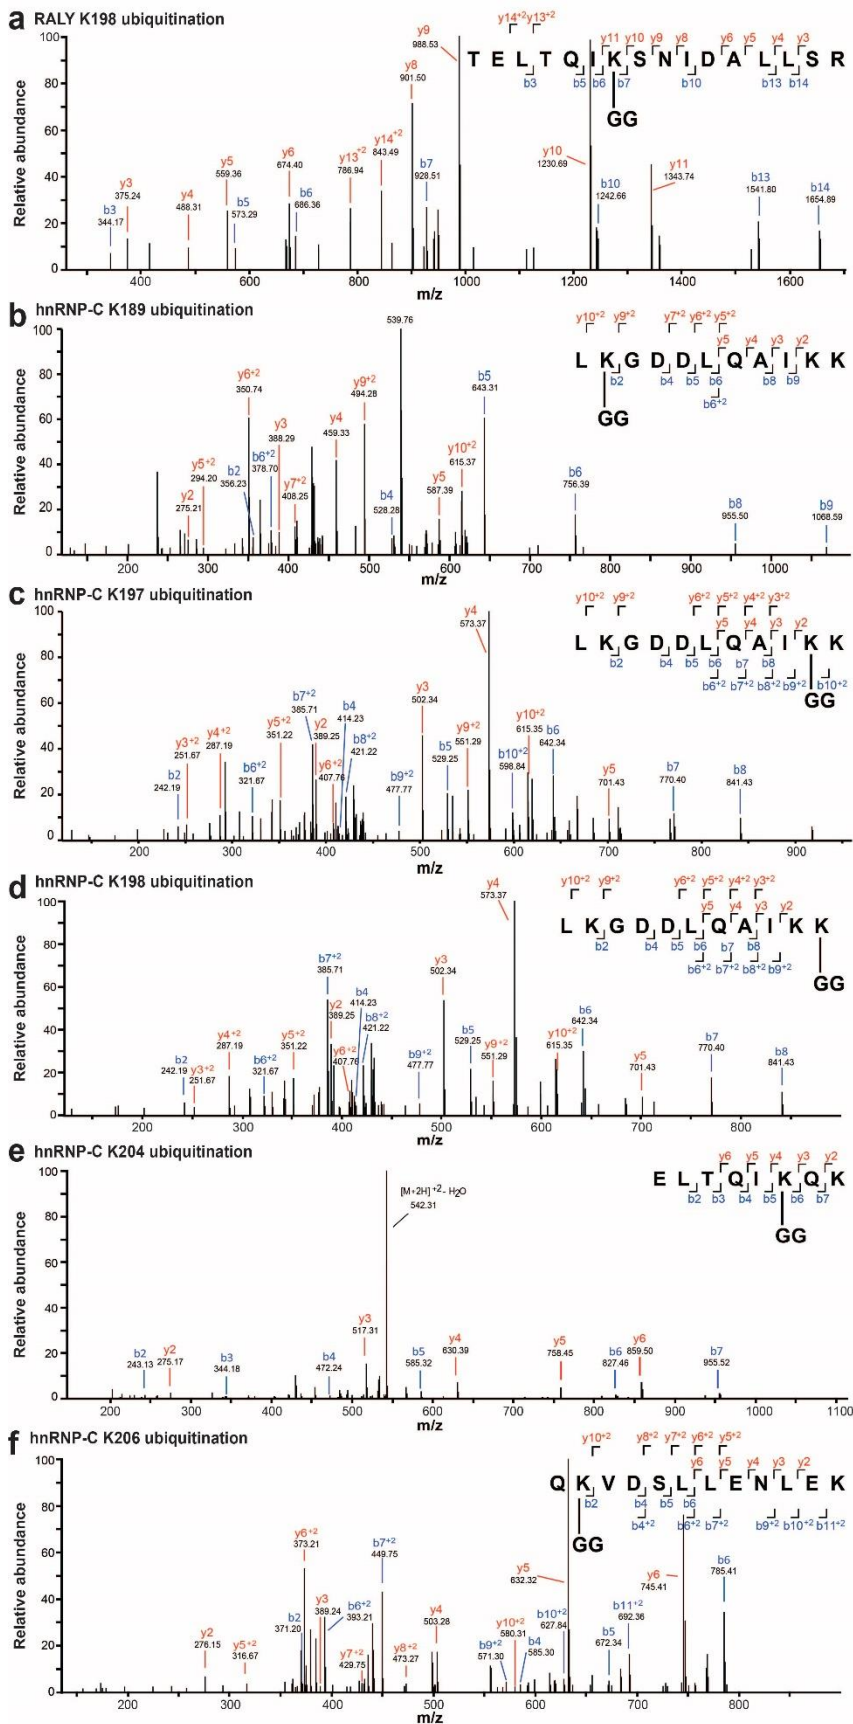

**Supplementary Figure 5 | MS2 evidence for ubiquitination site localization in RALY (a) and hnRNP-C (b-f) peptides.** Spectra were obtained from LC-MS/MS analyses using collision-induced dissociation (CID) at 35%, and identified in MaxQuant 1.6.0.1. All modified residues can be confidently identified by confirming ions, except for hnRNP-C K198 (d), which lacks ions to distinguish between K197 and K198. Best evidence spectra were selected for annotation of b-ion (blue) and y-ion (red) series and their masses for singly- and doubly-charged fragments.

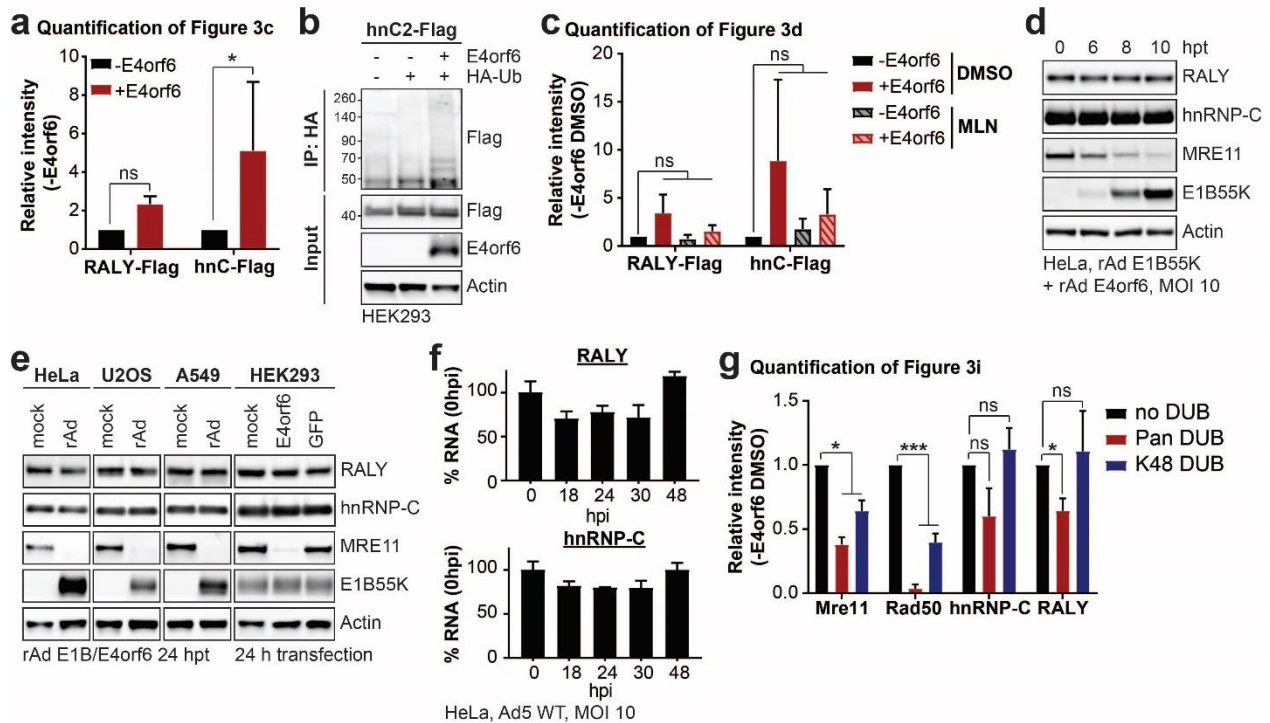

**Supplementary Figure 6 | RALY and hnRNP-C are not decreased upon transduction in multiple cell lines.** **a**, Quantification of immunoblot shown in Figure 3c in triplicate. **b**, HEK293 cells transfected with the indicated constructs for 24 h followed by denaturing IP with HA antibody and immunoblot analysis of hnRNP-C2-Flag. **c**, Quantification of immunoblot shown in Figure 3d in triplicate. **d**, Immunoblot analysis of protein levels in HeLa cells over a time course of transduction with recombinant Ad vectors expressing only E1B55K and E4orf6 (MOI=10). **e**, Immunoblot analysis of protein levels in HeLa, U2OS, A549 and HEK293 cells. HeLa, U2OS and A549 cells were transduced with recombinant Ad vectors expressing only E1B55K and E4orf6 for 24 h. HEK293 cells, which contain an endogenous copy of E1B55K, were mock transfected or transfected with plasmids expressing E4orf6 or GFP. **f**, Bar graphs of RALY and hnRNP-C RNA levels over a time course of infection with Ad5 WT (MOI=10) relative to mock as determined by RT-qPCR, shown is mean+s.d, n equals three biological replicates. **g**, Quantification of immunoblot shown in Figure 3i in triplicate. All immunoblots are representative of at least three biological replicates. Statistical significance was calculated using a paired, two-tailed Student's t-test, \*  $p < 0.05$ , \*\*  $p < 0.01$ , \*\*\*  $p < 0.005$ .

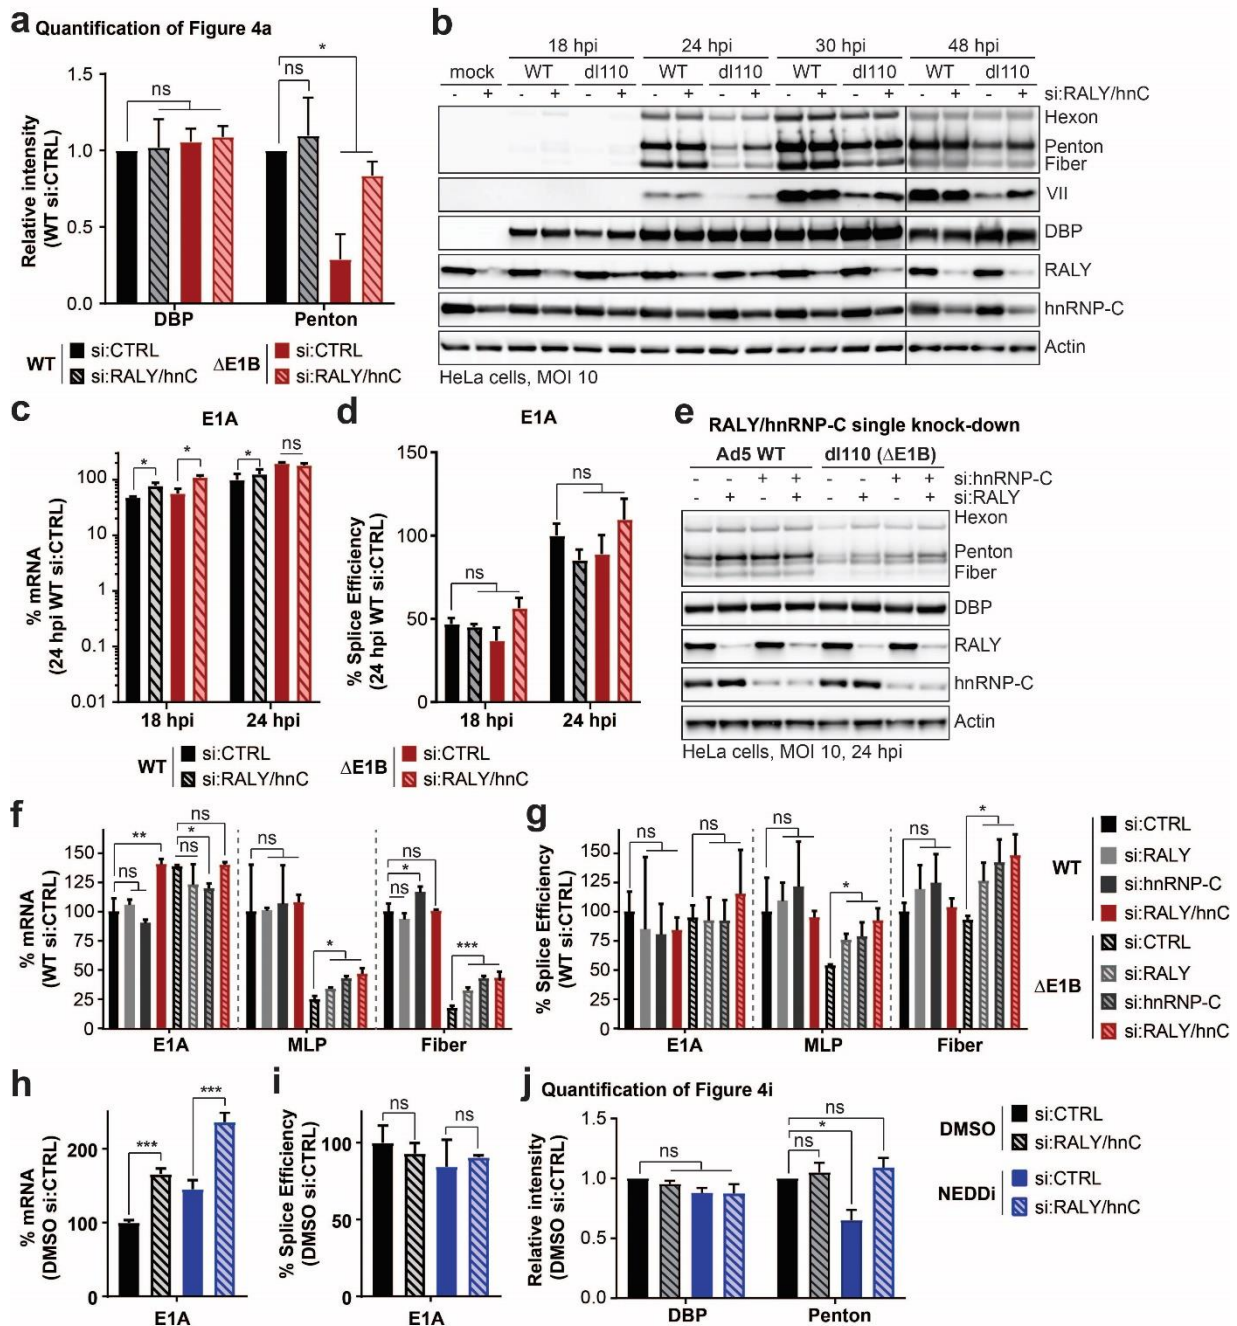

**Supplementary Figure 7 | RALY and hnRNP-C single knockdown rescue late protein, RNA and splice efficiency during infection with Ad  $\Delta$ E1B.** **a-d**, HeLa cells transfected with control (siCTRL) or RALY and hnRNP-C (siRALY/hnC) siRNA 24 h prior to infection with Ad5 WT or  $\Delta$ E1B (MOI=10), harvested at respective time points. **a**, Quantification of immunoblot shown in Figure 4a in triplicate. **b**, Extended immunoblot analysis of viral and cellular protein levels. **c**, Bar graph representing spliced RNA levels of viral early transcript E1A measured by RT-qPCR. **d**, Bar graph representing splicing efficiency as defined as the ratio of spliced to unspliced transcripts of E1A measured by RT-qPCR. **e-g**, HeLa cells transfected with control siRNA (siCTRL), siRNA for RALY (siRALY), siRNA for hnRNP-C (sihnRNP-C) or siRNA for both RALY and hnRNP-C (siRALY/hnC) 24 h prior to infection with Ad5 WT or  $\Delta$ E1B (MOI=10) and harvested at 24 hpi. **e**, Immunoblot analysis of viral and cellular protein levels. **f**, Bar graph representing spliced RNA levels of E1A, MLP and fiber measured by RT-qPCR. **g**, Bar graph representing splicing efficiency as defined as the ratio of spliced to unspliced transcripts of E1A, MLP and fiber measured by RT-qPCR. **h-j**, HeLa cells transfected with control (siCTRL) or RALY and hnRNP-C (siRALY/hnC) siRNA 24 h prior to infection with Ad5 WT (MOI=10), treated with either DMSO or NEDDi at 8 hpi and processed at 24 hpi. **h**, Bar graph representing spliced RNA levels of E1A measured by RT-qPCR. **i**, Bar graph representing splicing efficiency as defined as the ratio of spliced to unspliced transcripts of E1A measured by RT-qPCR. **j**, Quantification of immunoblot shown in Figure 4i in triplicate. All immunoblots are representative of at least three biological experiments. All graphs show the mean+s.d. with n equals three biological replicates. Statistical significance was calculated using a paired (a and j) or unpaired (others), two-tailed Student's t-test, \*  $p < 0.05$ , \*\*  $p < 0.01$ , \*\*\*  $p < 0.005$ .

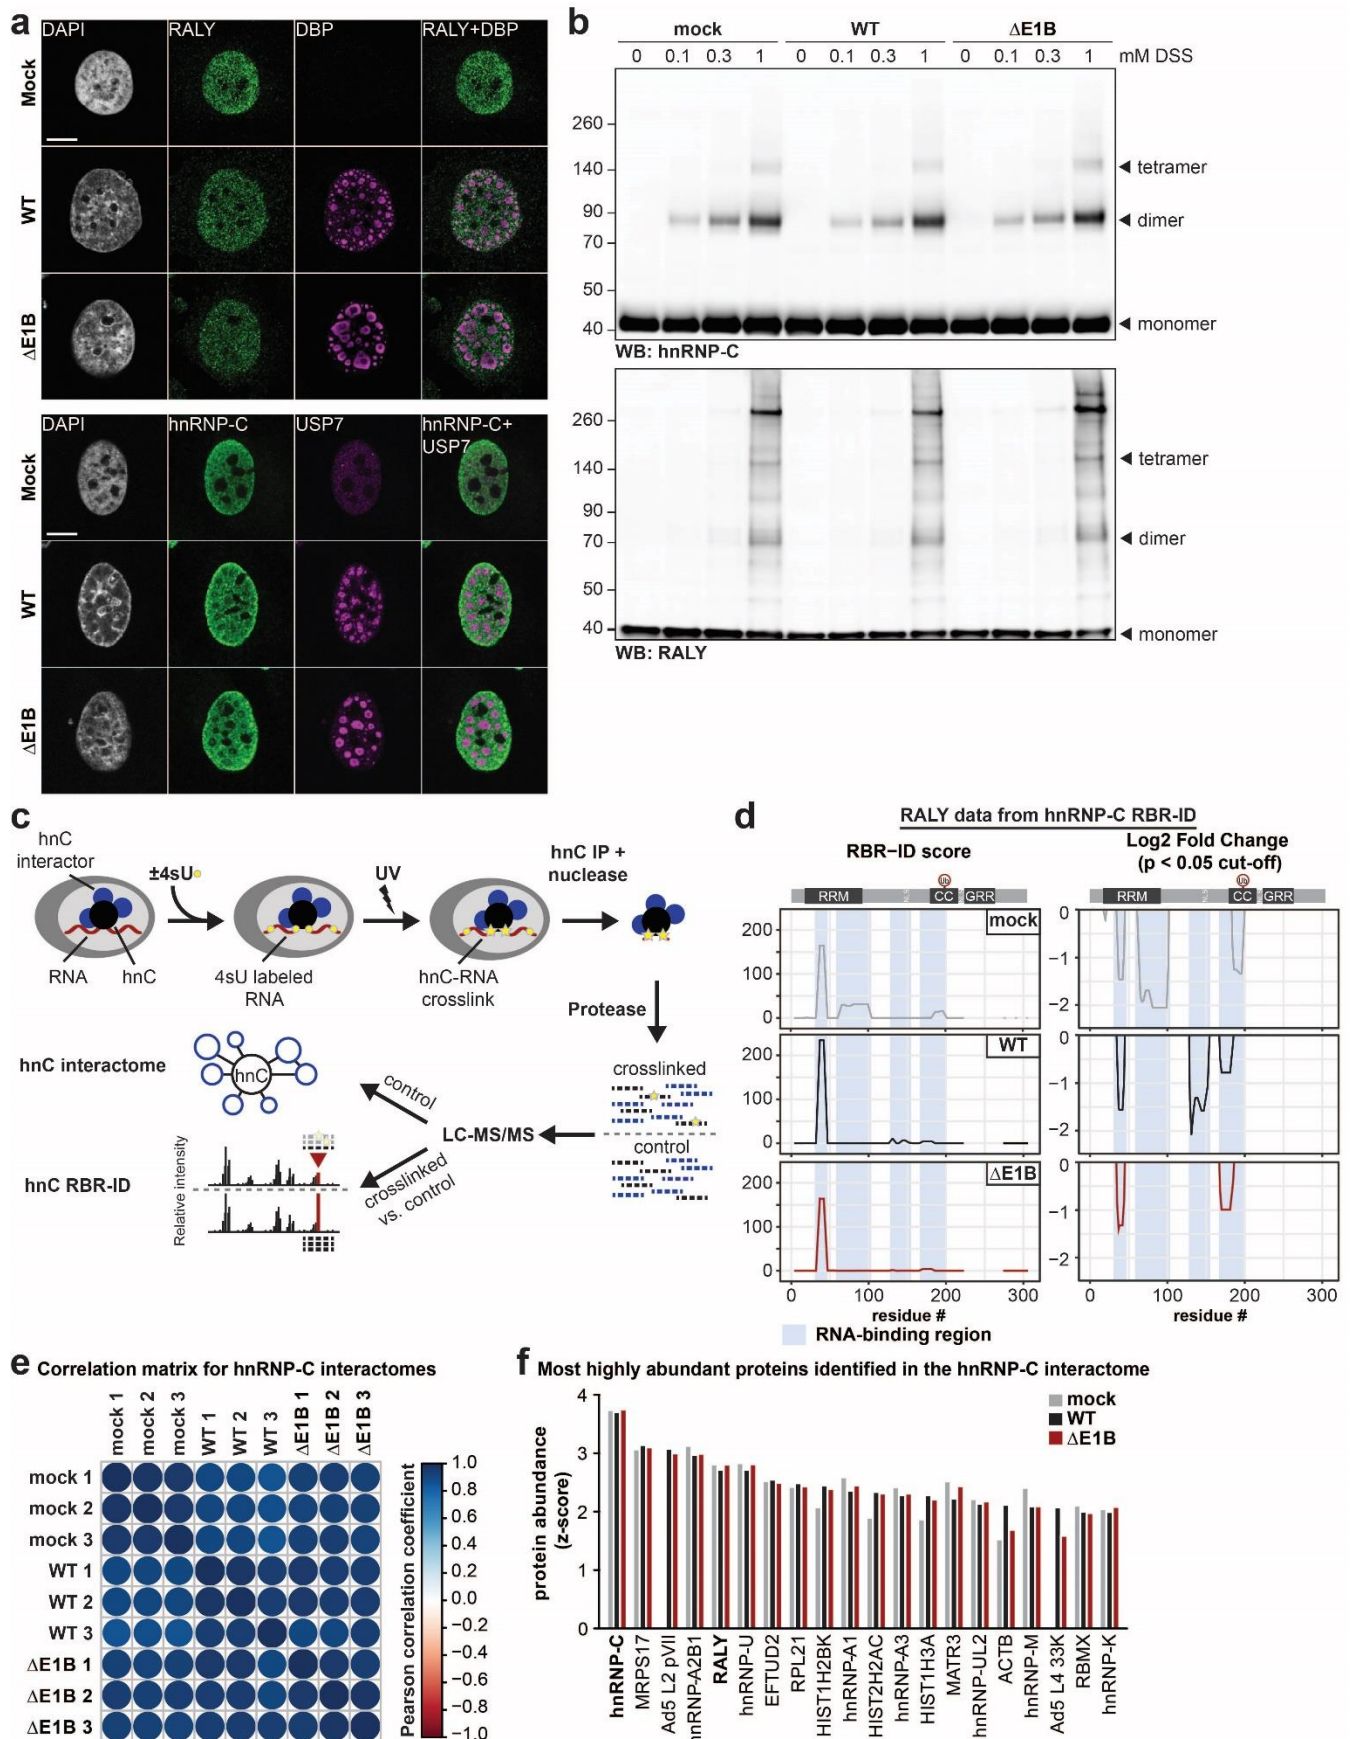

**Supplementary Figure 8 | No dramatic difference in protein localization and protein-complex formation of RALY and hnRNP-C between Ad WT and  $\Delta E1B$  infection. a, Representative images of immunofluorescence comparing the localization of**

RALY and hnRNP-C (both green) in mock, Ad WT and  $\Delta$ E1B infection of HeLa cells (MOI=10, 24 hpi). Viral replication centers are stained by DBP or USP7 (both magenta) and nuclear DNA by DAPI (grey). Scale bar 10  $\mu$ m. **b**, Immunoblot analysis of RALY and hnRNP-C protein complexes formed upon mock, Ad WT and  $\Delta$ E1B infection of HeLa cells (MOI=10) and treatment with indicated concentrations of disuccinimidyl suberate (DSS) for 30 min at 24 hpi. Representative of three biological replicates. **c**, Schematic for targeted hnRNP-C RNA-binding region identification (RBR-ID) and interactome. **d**, Data for RALY from hnRNP-C RBR-ID experiment comparing mock (grey), Ad5 WT (black), and  $\Delta$ E1B (red) at 24 hpi and MOI 10. Shown are smoothed residue-level RBR-ID score plotted along the primary sequence (**left**) and smoothed residue-level fold-change between crosslinked and control conditions with a significance threshold of  $p < 0.05$  (**right**). RALY domain structure with ubiquitination site is shown above graphs. RNA-binding regions are highlighted in blue. **e**, Correlation matrix for hnRNP-C interactome between replicates of mock, Ad5 WT, and Ad5  $\Delta$ E1B. Color gradient is based on the Pearson correlation coefficient with correlation ( $> 0.0$ ) in blue and anti-correlation ( $< 0.0$ ) in red. **f**, Comparison of z-scores for top 20 proteins identified in hnRNP-C interactome during WT Ad5 infection (MOI 10, 24 hpi). Mock = grey, Ad5 WT = black, Ad5  $\Delta$ E1B = red.

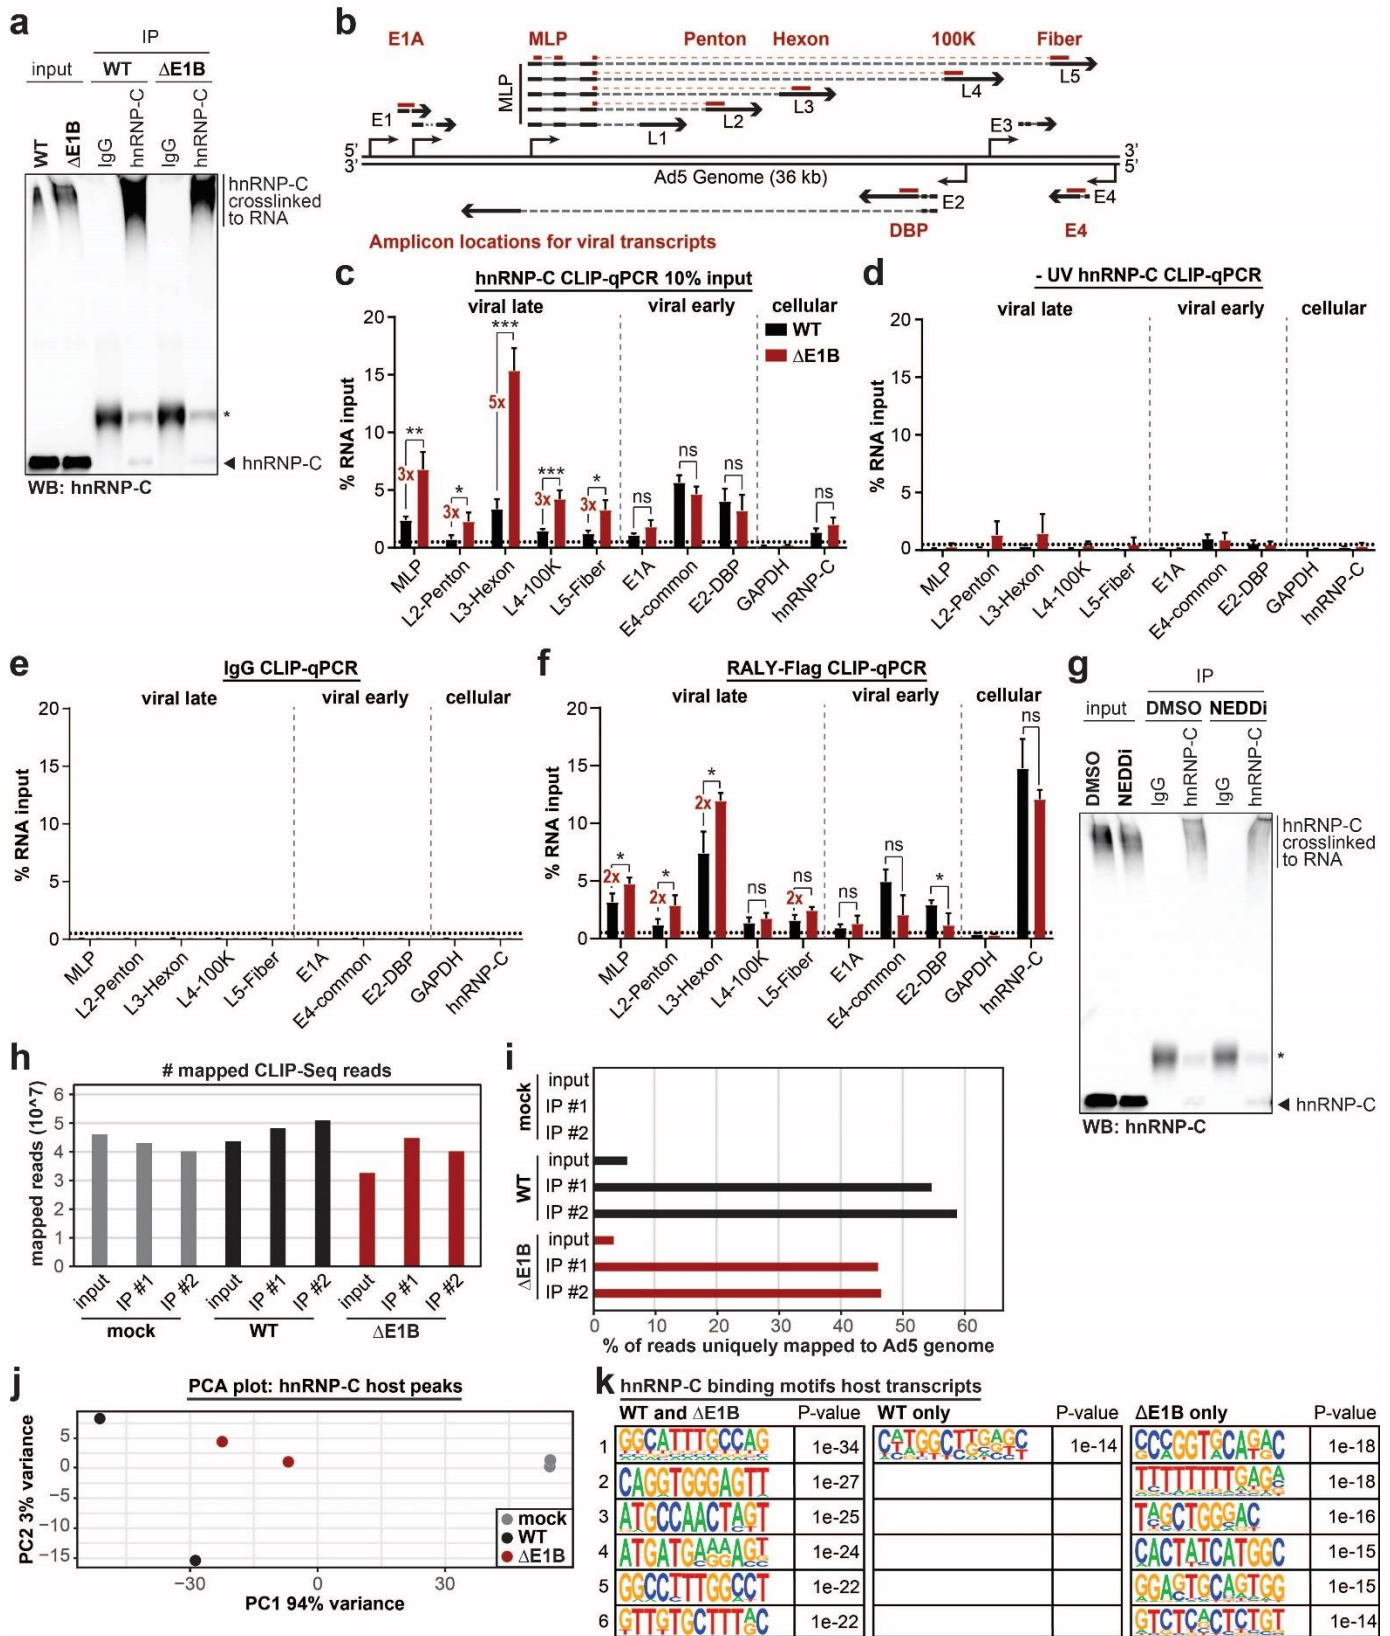

**Supplementary Figure 9 | hnRNP-C and RALY interact more with viral late RNA in the absence of E1B55K.** **a**, Control immunoblot for hnRNP-C CLIP-qPCR shown in Figure 5b. Higher molecular weight complexes stained with hnRNP-C antibody represent hnRNP-C crosslinked to RNA. \* marks the antibody heavy chain detected in the IP. Representative of at least three biological replicates for both CLIP-qPCR and immunoblot analysis thereof. **b**, Schematic of the Ad5 genome and viral transcription units. Location of amplicons for viral early (E1A, DBP, E4) and viral late (MLP, Penton, Hexon, 100K, Fiber) are noted. **c**, HeLa

cells infected with either WT Ad5 or  $\Delta$ E1B (MOI=10), UV-crosslinked and harvested at 24 hpi, subjected to hnRNP-C CLIP with only 10% of input as compared to Figure 5b and RT-qPCR for viral early and late transcripts. **d**, HeLa cells infected with either WT Ad5 or  $\Delta$ E1B (MOI=10), without UV-crosslinking and harvested at 24 hpi, subjected to hnRNP-C CLIP and RT-qPCR for viral early and late transcripts. **e**, HeLa cells infected with either WT Ad5 or  $\Delta$ E1B (MOI=10), UV-crosslinked and harvested at 24 hpi, subjected to IgG CLIP and RT-qPCR for viral early and late transcripts. **f**, HeLa cells induced for RALY-Flag expression with doxycycline for 3 days total, infected with either WT Ad5 or  $\Delta$ E1B (MOI=10), UV-crosslinked and harvested at 24 hpi, subjected to Flag CLIP and RT-qPCR for viral early and late transcripts. For all CLIP-qPCR experiments GAPDH is a cellular negative control. hnRNP-C is a cellular positive control. **g**, Control immunoblot for hnRNP-C CLIP-qPCR shown in Figure 5c. Higher molecular weight complexes stained with hnRNP-C antibody represent hnRNP-C crosslinked to RNA. \* marks the antibody heavy chain detected in the IP. Representative of three biological replicates for both CLIP-qPCR and immunoblot analysis thereof. **h**, Number of mapped hnRNP-C eCLIP-Seq reads for the indicated conditions. **i**, Percentage of mapped reads that uniquely mapped to the Ad5 genome for the different hnRNP-C eCLIP-Seq conditions. **j**, PCA plot for hnRNP-C peaks mapped to host transcripts comparing mock (grey), Ad5 WT (black), and Ad5  $\Delta$ E1B (red). **k**, Top 6 hnRNP-C binding motifs identified for binding sites in WT and  $\Delta$ E1B infection, WT infection only, and  $\Delta$ E1B infection only.
